# Supplementary material for: The Feasibility of Animal-Based Indicators of Consciousness and Unconsciousness for Stunning in Sheep: A Systematic Review
Source: Animals (Basel). 2023 Apr 18;13(8):1395. doi: 10.3390/ani13081395 (PMC10134993; doi:10.3390/ani13081395)
Supplement: Supplementary file 1 [file animals-13-01395-s001.zip › Data_sheet_S2.xlsx]

## Sheet: all_records
number	Authors	Author(s) ID	Titles	SCREENING (0=PERTINENT;1=NO SLAUGHTER CONTEXT IN GENERAL;2=OTHER SPECIES; 3=SLAUGHTER W/O PRIOR STUN (RITUAL); 4=GAS STUNNING METHOD; 5= NOT ANIMAL-RELATED (RESOURCE, SURVEY, ECC);6=CHECK)	Year	Source title	Volume	Issue	Art. No.	Page start	Page end	Page count	DOI	Cited by	Link	Affiliations	Authors with affiliations	Abstract	Author Keywords	Language of Original Document	Document Type	Publication Stage	Open Access	Source	EID
	Anil M.H.; Yesildere T.; Aksu H.; Matur E.; McKinstry J.L.; Erdogan O.; Hughes S.; Mason C.	7003722254; 6506983524; 57206755214; 6602294360; 6701792417; 57203145655; 57201999683; 7202125526	Comparison of religious slaughter of sheep with methods that include pre-slaughter stunning, and the lack of differences in exsanguination, packed cell volume and meat quality parameters	assessed for eligibility	2004	Animal Welfare	13	4		387	392	5		43	https://www.scopus.com/inward/record.uri?eid=2-s2.0-8544232771&partnerID=40&md5=16e39929160922a8bff9d9909037f24f	University of Bristol, Dept. of Clinical Veterinary Science, Bristol BS18 7DY, Langford, United Kingdom; Chamber Vet. Surgeons Istanbul IVHO, Beyoglo, Istanbul, Sofyali Sok, Asmali Mescit, Tunel, Turkey; Humane Slaughter Association, The Old School, Hertfordshire AL4 8AN, Brewhouse Hill, Wheathampstead, United Kingdom	Anil M.H., University of Bristol, Dept. of Clinical Veterinary Science, Bristol BS18 7DY, Langford, United Kingdom; Yesildere T., Chamber Vet. Surgeons Istanbul IVHO, Beyoglo, Istanbul, Sofyali Sok, Asmali Mescit, Tunel, Turkey; Aksu H., Chamber Vet. Surgeons Istanbul IVHO, Beyoglo, Istanbul, Sofyali Sok, Asmali Mescit, Tunel, Turkey; Matur E., Chamber Vet. Surgeons Istanbul IVHO, Beyoglo, Istanb…	UK legislation requiring pre-slaughter stunning has certain exemptions for religious slaughter. Supporters of both Muslim (Halal) and Jewish (Shechita) slaughter methods claim that the efficiency of the bleed out is adversely affected by stunning. In this study, electrical stunning followed by neck cutting, and captive bolt stunning followed by neck cutting, were compared with the Muslim slaughte…	Animal welfare; Blood loss; Halal; Religious slaughter; Shechita; Stunning	English	Article	Final		Scopus	2-s2.0-8544232771
	Kiran M.; Naveena B.M.; Smrutirekha M.; Baswa Reddy P.; Rituparna B.; Praveen Kumar Y.; Venkatesh C.; Rapole S.	57200216256; 57239450800; 57204364857; 56786391300; 56220280800; 55763348200; 57204363693; 55857663300	Traditional halal slaughter without stunning versus slaughter with electrical stunning of sheep (Ovis aries)	assessed for eligibility	2019	Meat Science	148			127	136	9	10.1016/j.meatsci.2018.10.011	13	https://www.scopus.com/inward/record.uri?eid=2-s2.0-85055351562&doi=10.1016%2fj.meatsci.2018.10.011&partnerID=40&md5=8eabb9457526ad73022ae70fd3893cdf	Department of Livestock Products Technology, Veterinary College, KVAFSU, Bidar, 585401, Karnataka, India; ICAR-National Research Centre on Meat, Chengicherla, Hyderabad, 500092, Telangana, India; Proteomics Lab, National Centre for Cell Science, Pune, 411007, Maharashtra, India	Kiran M., Department of Livestock Products Technology, Veterinary College, KVAFSU, Bidar, 585401, Karnataka, India; Naveena B.M., ICAR-National Research Centre on Meat, Chengicherla, Hyderabad, 500092, Telangana, India; Smrutirekha M., ICAR-National Research Centre on Meat, Chengicherla, Hyderabad, 500092, Telangana, India; Baswa Reddy P., ICAR-National Research Centre on Meat, Chengicherla, Hyde…	Thirty Nellore crossbred male sheep (Ovis aries) were divided into two groups of 15 animals each and subjected to either pre-slaughter electrical stunning followed by slaughter (ST) or traditional halal slaughter without stunning (NST) to investigate the changes in blood biochemical parameters, meat quality and proteomic profile. Higher (P <.05) pH, water holding capacity and Warner-Bratzler shea…	Animal welfare; Differential gel electrophoresis; Electrical stunning; Halal slaughter; Mass spectrometry	English	Article	Final		Scopus	2-s2.0-85055351562
	Grandin T.	57204287640	Auditing animal welfare and making practical improvements in beef-, pork- and sheep-slaughter plants	assessed for eligibility	2012	Animal Welfare	21	SUPPL. 2		29	34	5	10.7120/096272812X13353700593400	16	https://www.scopus.com/inward/record.uri?eid=2-s2.0-84861328211&doi=10.7120%2f096272812X13353700593400&partnerID=40&md5=f3e72f75dc3112c9ff26a94e8bb4fd1f	Department of Animal Science, Colorado State University, Fort Collins, CO 80523-1171, United States	Grandin T., Department of Animal Science, Colorado State University, Fort Collins, CO 80523-1171, United States	A welfare audit that utilises numerically scored, animal-based outcome measures has been used successfully by McDonald's and other restaurant companies for over ten years. In 2010, audit data from two restaurant companies indicated that all 30 of their North American plants rendered 95% or more of the cattle insensible with a single shot from a captive-bolt gun. Eight pork plants that used electr…	Animal welfare; Auditing; Handling; Slaughter; Stunning; Vocalisation	English	Article	Final		Scopus	2-s2.0-84861328211
	Kiran M.; Maheswarappa N.B.; Banerjee R.; Ch V.; Rapole S.	57200216256; 57239450800; 56220280800; 57270986900; 55857663300	Impact of stunning before slaughter on expression of skeletal muscles proteome in sheep	assessed for eligibility	2021	Animal Biotechnology							10.1080/10495398.2021.1976198	1	https://www.scopus.com/inward/record.uri?eid=2-s2.0-85115650876&doi=10.1080%2f10495398.2021.1976198&partnerID=40&md5=0852965fa216dbf9c07e79090be821a5	Department of Livestock Products Technology, Veterinary College, KVAFSU, Bidar, India; ICAR-National Research Centre on Meat, Hyderabad, India; Proteomics Lab, National Centre for Cell Science, Pune, India	Kiran M., Department of Livestock Products Technology, Veterinary College, KVAFSU, Bidar, India; Maheswarappa N.B., ICAR-National Research Centre on Meat, Hyderabad, India; Banerjee R., ICAR-National Research Centre on Meat, Hyderabad, India; Ch V., Proteomics Lab, National Centre for Cell Science, Pune, India; Rapole S., Proteomics Lab, National Centre for Cell Science, Pune, India	The commercial production of halal and kosher meat and controversy surrounding the slaughter without stunning is rapidly growing across the globe. Huge global market for halal and kosher meat warrants conciliation of religious practices and animal welfare for the betterment of meat industry. In the present study, we investigated changes in muscle proteome of sheep (Ovis aries) subjected to either…	2-dimensional gel electrophoresis; Animal welfare; bioinformatics; electrical stunning; halal; mass spectrometry; proteomics	English	Article	Article in press		Scopus	2-s2.0-85115650876
	Santos V.C.; Ezequiel J.M.B.; De Oliveira D'Aurea E.M.; Fávaro V.R.; Da Silva D.A.V.; Homem A.C., Jr.; Lage J.F.; Negrão J.A.	24336294600; 6602307283; 56382955900; 36132780400; 55561666400; 35386426300; 36642328200; 6604061626	Influence of stunning methods on the welfare of glycerine-fed lambs	assessed for eligibility	2014	Semina:Ciencias Agrarias	35	4		2541	2554	13	10.5433/1679-0359.2014v35n4Supl1p2541	1	https://www.scopus.com/inward/record.uri?eid=2-s2.0-84907917905&doi=10.5433%2f1679-0359.2014v35n4Supl1p2541&partnerID=40&md5=507875f0cdc1228cc20699be15cad8e3	Universidade Estadual Paulista Julio de Mesquita Filho, UNESP/FCAV, Jaboticabal, SP, Brazil; Dept de Zootecnia, UNESP/FCAV, Jaboticabal, SP, Brazil; UNESP/FCAV, Jaboticabal, SP, Brazil; Dept de Ciências Básicas, Universidade de São Paulo, USP/FZEA, Pirassununga, SP, Brazil	Santos V.C., Universidade Estadual Paulista Julio de Mesquita Filho, UNESP/FCAV, Jaboticabal, SP, Brazil; Ezequiel J.M.B., Dept de Zootecnia, UNESP/FCAV, Jaboticabal, SP, Brazil; De Oliveira D'Aurea E.M., UNESP/FCAV, Jaboticabal, SP, Brazil; Fávaro V.R., Universidade Estadual Paulista Julio de Mesquita Filho, UNESP/FCAV, Jaboticabal, SP, Brazil; Da Silva D.A.V., UNESP/FCAV, Jaboticabal, SP, Brazi…	The effects of electrical and non-penetrating bolt pistol stunning methods were evaluated. Forty uncastrated, mixed-breed (1/2 Santa Inês x 1/2 Dorper) males were used. The welfare of lambs was not affected (P> 0.05) by the inclusion of glycerin in the diet. The color of the meat (24 hours after slaughter) of lambs stunned with a non-penetrating bolt pistol was lighter (P> 0.05). The shear force,…	Blood parameters; Electrical stimulation; Meat quality; Non-penetrating bolt pistol; Sheep	English	Article	Final		Scopus	2-s2.0-84907917905
	Eriksen M.S.; Rødbotten R.; Grøndahl A.M.; Friestad M.; Andersen I.L.; Mejdell C.M.	7006114057; 6602332888; 6602905403; 57215630768; 7101937964; 6506960086	Mobile abattoir versus conventional slaughterhouse-Impact on stress parameters and meat quality characteristics in Norwegian lambs	assessed for eligibility	2013	Applied Animal Behaviour Science	149	2023-04-01		21	29	8	10.1016/j.applanim.2013.09.007	24	https://www.scopus.com/inward/record.uri?eid=2-s2.0-84888436213&doi=10.1016%2fj.applanim.2013.09.007&partnerID=40&md5=61209466945d18555dc0863395b6b963	Department of Animal and Aquacultural Sciences, Norwegian University of Life Sciences, 1432 Ås, Arboretveien 6, PO Box 5003, Norway; Nofima, NO-1431 Ås, PO Box 210, Norway; Department of Health Surveillance, Norwegian Veterinary Institute, 0106 Oslo, PO Box 750 Sentrum, Norway	Eriksen M.S., Department of Animal and Aquacultural Sciences, Norwegian University of Life Sciences, 1432 Ås, Arboretveien 6, PO Box 5003, Norway; Rødbotten R., Nofima, NO-1431 Ås, PO Box 210, Norway; Grøndahl A.M., Department of Health Surveillance, Norwegian Veterinary Institute, 0106 Oslo, PO Box 750 Sentrum, Norway; Friestad M., Department of Animal and Aquacultural Sciences, Norwegian Univer…	The aim of the present study was to investigate possible differences in certain stress parameters and meat quality characteristics between Norwegian lambs slaughtered at a mobile abattoir (at two different localities) versus lambs slaughtered at a conventional, stationary slaughterhouse. Lambs slaughtered at the conventional slaughterhouse had higher serum cortisol levels than lambs slaughtered a…	Animal welfare; Lamb; Meat quality; Mobile abattoir; Slaughter; Stress	English	Article	Final		Scopus	2-s2.0-84888436213
	Mason A.; Tolo E.; Hektoen L.; Haga H.A.	18434496800; 36344280700; 55311380700; 7101608855	The effect of electrical head-to-chest stunning on the EEG in sheep	assessed for eligibility	2018	Animal Welfare	27	4		343	350	7	10.7120/09627286.27.4.343	3	https://www.scopus.com/inward/record.uri?eid=2-s2.0-85055000421&doi=10.7120%2f09627286.27.4.343&partnerID=40&md5=29521235c5f9a0a8e703ede498b30123	Norwegian Meat and Poultry Research Institute, PO Box 396, Oslo, 0513, Norway; Norwegian University of Life Sciences, Faculty of Veterinary Medicine, Pb 369 Sentrum, Oslo, 0102, Norway	Mason A., Norwegian Meat and Poultry Research Institute, PO Box 396, Oslo, 0513, Norway; Tolo E., Norwegian Meat and Poultry Research Institute, PO Box 396, Oslo, 0513, Norway; Hektoen L., Norwegian University of Life Sciences, Faculty of Veterinary Medicine, Pb 369 Sentrum, Oslo, 0102, Norway; Haga H.A., Norwegian University of Life Sciences, Faculty of Veterinary Medicine, Pb 369 Sentrum, Oslo,…	Head-to-body stunning is regarded as 'best practice' stunning for sheep. The benefits are loss of consciousness followed by cardiac arrest, death, prevention of animal movements post stun/kill and improved meat quality. Commercial equipment places electrodes on the head and back, which is known to cause pelt burning, thus reducing the value of the skins. The aim was to demonstrate that passing cu…	Animal welfare; EEG; Electrical Stunning; Head-To-Back; Head-To-Chest; Sheep	English	Article	Final		Scopus	2-s2.0-85055000421
	Orford F.; Ford E.A.; Brown S.N.; McKinstry J.; Hadley P.J.; Lines J.A.; Knowles T.G.; Wotton S.B.	57190341594; 56318842300; 7501417635; 6701792417; 55926633700; 7006374986; 7005124141; 7007055463	The evaluation of two commercial electric sheep stunning systems: Current applied and the effect on heart function	assessed for eligibility	2016	Animal Welfare	25	3		331	337	6	10.7120/09627286.25.3.331	4	https://www.scopus.com/inward/record.uri?eid=2-s2.0-84979243452&doi=10.7120%2f09627286.25.3.331&partnerID=40&md5=9ba4904a3270812798d1715019e8f2d6	School of Veterinary Science, University of Bristol, Langford, Bristol, BS40 5DU, United Kingdom; AHDB Beef and Lamb, Creech Castle, Bathpool, Taunton, TA1 2DX, United Kingdom; Silsoe Livestock Systems Ltd., Silsoe, Bedford, MK45 4HS, United Kingdom	Orford F., School of Veterinary Science, University of Bristol, Langford, Bristol, BS40 5DU, United Kingdom; Ford E.A., AHDB Beef and Lamb, Creech Castle, Bathpool, Taunton, TA1 2DX, United Kingdom; Brown S.N., School of Veterinary Science, University of Bristol, Langford, Bristol, BS40 5DU, United Kingdom; McKinstry J., School of Veterinary Science, University of Bristol, Langford, Bristol, BS40…	The maintenance of head-only minimum stunning currents for sheep to ≥ 1.0 Amp as per current legislation was examined in two trials in a commercial abattoir. In the first trial, a Jetco MS100 stunner failed to maintain the current to > 1.0 Amp in 118 of the 228 sheep. In a second trial, a Jetco MS105 delivered sufficient current in all sheep (n = 275) to meet the legislative requirement, apart fr…	Animal welfare; Electrical stunning; Electrocardiogram; Halal; Sheep; Voltage current	English	Article	Final	All Open Access; Green Open Access	Scopus	2-s2.0-84979243452
	Khalid R.; Knowles T.G.; Wotton S.B.	56711039800; 7005124141; 7007055463	A comparison of blood loss during the Halal slaughter of lambs following Traditional Religious Slaughter without stunning, Electric Head-Only Stunning and Post-Cut Electric Head-Only Stunning	assessed for eligibility	2015	Meat Science	110			15	23	8	10.1016/j.meatsci.2015.06.008	40	https://www.scopus.com/inward/record.uri?eid=2-s2.0-84935490741&doi=10.1016%2fj.meatsci.2015.06.008&partnerID=40&md5=9ef62c595cfe661e4c5179486125a1da	Euro Quality Lambs Ltd, Euro House, Dale Street, Craven Arms, Shropshire, SY7 9PA, United Kingdom; University of Bristol, School of Veterinary Sciences, Langford, Bristol, BS40 5DU, United Kingdom	Khalid R., Euro Quality Lambs Ltd, Euro House, Dale Street, Craven Arms, Shropshire, SY7 9PA, United Kingdom; Knowles T.G., University of Bristol, School of Veterinary Sciences, Langford, Bristol, BS40 5DU, United Kingdom; Wotton S.B., University of Bristol, School of Veterinary Sciences, Langford, Bristol, BS40 5DU, United Kingdom	Blood lost at exsanguination during the Halal slaughter of lambs was compared between the slaughter methods of Traditional Religious Slaughter without stunning (TRS), Electric Head-Only Stunning (EHOS) and Post-Cut Electric Head-Only Stunning (PCEHOS). Two protocols were examined, Experimental (80 lambs) and Commercial (360 lambs), assessing varying periods of animal orientation during the 4. min…	Blood; Halal; Post-cut stunning; Sheep; Slaughter with stunning; Slaughter without stunning	English	Article	Final	All Open Access; Green Open Access; Hybrid Gold Open Access	Scopus	2-s2.0-84935490741
	Grist A.; Lines J.A.; Bock R.; Knowles T.G.; Wotton S.B.	57193085398; 7006374986; 16196564300; 7005124141; 7007055463	An examination of the performance of blank cartridges used in captive bolt devices for the pre-slaughter stunning and euthanasia of animals	assessed for eligibility	2019	Animals	9	8	552				10.3390/ani9080552	5	https://www.scopus.com/inward/record.uri?eid=2-s2.0-85073276132&doi=10.3390%2fani9080552&partnerID=40&md5=5d4162c3e13351963aa1b1b7ed42aeff	School of Veterinary Sciences, University of Bristol, Langford House, Langford, North Somerset, BS40 5DU, United Kingdom; Silsoe Livestock Systems, Wrest Park, Silsoe, Bedford, MK45 4HR, United Kingdom; Bock Industries, Inc. (BI), 156 Bock Lane, Philipsburg, 16866, PA, United States	Grist A., School of Veterinary Sciences, University of Bristol, Langford House, Langford, North Somerset, BS40 5DU, United Kingdom; Lines J.A., Silsoe Livestock Systems, Wrest Park, Silsoe, Bedford, MK45 4HR, United Kingdom; Bock R., Bock Industries, Inc. (BI), 156 Bock Lane, Philipsburg, 16866, PA, United States; Knowles T.G., School of Veterinary Sciences, University of Bristol, Langford House,…	Blank cartridges provide the power source for the majority of captive bolt devices used for rendering animals unconscious prior to slaughter within the United Kingdom or euthanasia worldwide. This paper presents the results of the examination of cartridges as one of the variables that can contribute to an unsuccessful application of this method in practice. Variation was found in cartridge weight…	Animal welfare; Blank cartridges; Captive bolt devices; Cartridge variation; Mechanical stunning; Performance; Velocity measurement	English	Article	Final	All Open Access; Gold Open Access; Green Open Access	Scopus	2-s2.0-85073276132
	Negroni, JA; Lascano, EC; del Valle, HF; Crottogini, AJ		ATP-sensitive potassium channels do not have a main role in mediating late preconditioning protection against arrhythmias and stunning in conscious sheep	assessed for eligibility	2002	BASIC RESEARCH IN CARDIOLOGY	97	1		55	64		10.1007/s395-002-8388-7					Objective Although late preconditioning protects against stunning following several short periods of ischemia-reperfusion, it is not clear if it confers protection against stunning and malignant arrhythmias after a sustained reversible ischemia, and whether KATP channels are involved as triggers and/or end effectors of the protective mechanism. The purpose of this work was thus to test these issu…			Article			WOS
	Finnie, JW; Manavis, J; Blumbergs, PC; Summersides, GE		Brain damage in sheep from penetrating captive bolt stunning	assessed for eligibility	2002	AUSTRALIAN VETERINARY JOURNAL	80	1-2		67	69		10.1111/j.1751-0813.2002.tb12840.x					Objective To determine the severity and distribution of structural changes in the brains of adult sheep stunned by penetrating captive bolt.Procedure The unconstrained heads of ten, anaesthetised, unhorned, 2-year-old Merino sheep were impacted at the summit of the head with a penetrating captive bolt pistol. Six sheep were ventilated and four received no respiratory support. Two hours after impa…			Article			WOS
	Coore, RR; Love, S; McKinstry, JL; Weaver, HR; Phillips, A; Hillman, T; Hiles, MJ; Shand, A; Helps, CR; Anil, MH		Dissemination of brain emboli following captive bolt stunning of sheep: Capacity for entry into the systemic arterial circulation	assessed for eligibility	2004	JOURNAL OF FOOD PROTECTION	67	5		1050	1052		10.4315/0362-028X-67.5.1050					The epidemic of bovine spongiform encephalopathy in the United Kingdom and the recognition of a variant of Creutzfeldt-Jakob disease prompted revision of the guidelines for slaughter of cattle and sheep to prevent contamination of the edible parts of the carcass with central nervous system tissue. We previously showed that captive bolt gun stunning, which is routinely used for the slaughter of ca…			Article			WOS
	Linares, M. B.; Bornez, R.; Vergara, H.		Effect of different stunning systems on meat quality of light lamb	assessed for eligibility	2007	MEAT SCIENCE	76	4		675	681		10.1016/j.meatsci.2007.02.007					The present study was proposed to compare the effect that different types of stunning (TS) had on the quality of refrigerated meat from light lambs of the Spanish Manchega breed at 24 h and 7 days post-mortem. Lambs were electrically stunned (ESL; n = 10), using CO2 (GSL; n = 10) or slaughtered without previous stunning (USL; n = 10). Measurements on meat quality were carried out by evaluating pH…			Article			WOS
	Finnie J.W.; Blumbergs P.C.; Manavis J.; Summersides G.E.; Davies R.A.	7005210299; 57203612784; 7004711882; 7801438460; 7404393715	Evaluation of brain damage resulting from penetrating and non-penetrating captive bolt stunning using lambs	assessed for eligibility	2000	Australian Veterinary Journal	78	11		775	778	3	10.1111/j.1751-0813.2000.tb10451.x	32	https://www.scopus.com/inward/record.uri?eid=2-s2.0-0034330855&doi=10.1111%2fj.1751-0813.2000.tb10451.x&partnerID=40&md5=fe0faa6a5bda887947af63fb9a3f76ae	Veterinary Services Division, Inst. of Med. and Veterinary Science, Gilles Plains, SA 5086, 101 Blacks Road, Australia; Neuropathology Laboratory, Inst. of Med. and Veterinary Science, Adelaide, SA 5001, Frome Road, Australia	Finnie J.W., Veterinary Services Division, Inst. of Med. and Veterinary Science, Gilles Plains, SA 5086, 101 Blacks Road, Australia; Blumbergs P.C., Neuropathology Laboratory, Inst. of Med. and Veterinary Science, Adelaide, SA 5001, Frome Road, Australia; Manavis J., Neuropathology Laboratory, Inst. of Med. and Veterinary Science, Adelaide, SA 5001, Frome Road, Australia; Summersides G.E., Veteri…	Objective To compare the brain damage in sheep resulting from penetrating and non-penetrating captive bolt stunning. Design The unrestrained heads of anaesthetised lambs were impacted in the temporal region with penetrating and non-penetrating captive bolt pistols (humane stunners) using a constant charge. Two hours after head impact, brains were perfusion-fixed with 4% paraformaldehyde. Coronal …	Brain trauma; Captive-bolt stunners; Sheep	English	Article	Final		Scopus	2-s2.0-0034330855
	Barrasso, Roberta; Tufarelli, Vincenzo; Ceci, Edmondo; Luposella, Francesco; Bozzo, Giancarlo		Evaluation of the Lambs' State of Consciousness Signs during Halal and Traditional Slaughtering	assessed for eligibility	2020	AGRICULTURE-BASEL	10	11	557				10.3390/agriculture10110557					The aim of this study was to evaluate the persistence of two signs of consciousness (rhythmic breathing and corneal reflex) in lambs slaughtered according to the traditional method and Halal ritual rite. A total of 240 lambs were examined and divided into two equal groups (n = 120 each). Lambs of group A were subjected to the stunning phase by the action of an electric current on the brain, while…			Article			WOS
	Bozzo, Giancarlo; Bonerba, Elisabetta; Barrasso, Roberta; Roma, Rocco; Luposella, Francesco; Zizzo, Nicola; Tantillo, Giuseppina		Evaluation of the Occurrence of False Aneurysms During Halal Slaughtering and Consequences on the Animal's State of Consciousness	assessed for eligibility	2020	ANIMALS	10	7	1183				10.3390/ani10071183					Simple Summary False aneurysm of the severed arteries is a potential concern in animals as it could extend the duration of brain function before they die. Indeed, false aneurysm formation in the carotids and a slow rate of blood loss may extend the period of consciousness during slaughter without stunning. The aim of this study was to monitor the development of false aneurysms in animals slaughte…			Article			WOS
	Gibson, Troy J.; Mason, Charles W.; Spence, Jade Y.; Barker, Heather; Gregory, Neville G.		Factors Affecting Penetrating Captive Bolt Gun Performance	assessed for eligibility	2015	JOURNAL OF APPLIED ANIMAL WELFARE SCIENCE	18	3		222	238		10.1080/10888705.2014.980579					Captive bolt stunning is used for rendering livestock insensible at slaughter. The mechanical factors relating to performance of 6 penetrating captive bolt gun (CBG) models were examined. The Matador Super Securit 3000 and the .25 Cash Euro Stunner had the highest kinetic energy values (443 J and 412 J, respectively) of the CBGs tested. Ninety percent (27/30) of CBGs held at a government gun repo…			Article			WOS
	Linares, M. B.; Vergara, H.		Light lamb meat quality packed under modified atmospheres: effect of stunning systems (electrically v. gas)	assessed for eligibility	2009	ANIMAL	3	12		1763	1771		10.1017/S1751731109990711					In the present study, the effect of type of stunning (electrical v. gas) and the gas mixtures in a modified atmosphere (MA) packing system (MA-A: 30% CO2 + 70% O-2; MA-B: 30% CO2 + 69.3% N-2 + 0.7% CO; MA-C: 40% CO2 + 60% N-2) on light lamb meat quality, obtained by 20 males of Manchego Spanish breed, was evaluated at 7, 14 and 21 days post packing. For all ageing times, gas-stunned groups reache…			Article			WOS
	Zivotofsky A.Z.; Strous R.D.	6701515080; 7003852701	A perspective on the electrical stunning of animals: Are there lessons to be learned from human electro-convulsive therapy (ECT)?	no info	2012	Meat Science	90	4		956	961	5	10.1016/j.meatsci.2011.11.039	34	https://www.scopus.com/inward/record.uri?eid=2-s2.0-84855555089&doi=10.1016%2fj.meatsci.2011.11.039&partnerID=40&md5=f84e8038ab1cdbf1b5986ec3c4598692	Gonda Brain Research Center, Bar-Ilan University, Ramat-Gan, Israel; Beer Yaakov Mental Health Center, Sackler Faculty of Medicine, Tel Aviv University, Israel	Zivotofsky A.Z., Gonda Brain Research Center, Bar-Ilan University, Ramat-Gan, Israel; Strous R.D., Beer Yaakov Mental Health Center, Sackler Faculty of Medicine, Tel Aviv University, Israel	Animals have been slaughtered by humans since time immemorial. Over the last few generations attention has been focused on minimizing the animal's pain and suffering during slaughter. Based on the assumption that loss of consciousness due to electrical stunning combined with exsanguination is a humane technique of slaughter, this procedure has become one of the most widely employed methods in com…	Animal welfare; Slaughter; Stunning	English	Article	Final		Scopus	2-s2.0-84855555089
	Poeta A.; Santella E.; Salamano G.; Cuccurese A.; Sechi P.; Cambiotti V.; Cenci-Goga B.T.	6506104481; 56017933400; 23502567500; 36015116900; 43861693800; 54791936000; 6603228741	Acceptability of electrical stunning and post-cut stunning among muslim communities: A possible dialogue	no info	2013	Society and Animals	21	5		443	458	15	10.1163/15685306-12341310	21	https://www.scopus.com/inward/record.uri?eid=2-s2.0-84893111354&doi=10.1163%2f15685306-12341310&partnerID=40&md5=cf62d1a8c636afaa8eed89bf8f936f64	School of Veterinary Medicine, Università Degli Studi di Perugia, Azienda Sanitaria Locale Torino, Italy; Dipartimento Sanità Pubblica Azienda, USL Reggio Emilia, Italy	Poeta A., Dipartimento Sanità Pubblica Azienda, USL Reggio Emilia, Italy; Santella E., School of Veterinary Medicine, Università Degli Studi di Perugia, Azienda Sanitaria Locale Torino, Italy; Salamano G., School of Veterinary Medicine, Università Degli Studi di Perugia, Azienda Sanitaria Locale Torino, Italy; Cuccurese A., Dipartimento Sanità Pubblica Azienda, USL Reggio Emilia, Italy; Sechi P.,…	Current technical-scientific advances allow a reappraisal of some practices used during religious slaughter without compromising its deep and essential meaning, through to the identification of techniques that limit the nonhuman animal vigilance without causing any lesion that may impair its integrity. All this in respect of religious principles of the Jewish and Muslim community and in respect o…	dialogue; Halal; Muslim communities; post-cut stunning; reversible stunning; ritual slaughter	English	Article	Final		Scopus	2-s2.0-84893111354
	Stadler, B; Phillips, J; Toyoda, Y; Federman, M; Levitsky, S; McCully, JD		Adenosine-enhanced ischemic preconditioning modulates necrosis and apoptosis: Effects of stunning and ischemia-reperfusion	no info	2001	ANNALS OF THORACIC SURGERY	72	2		555	563		10.1016/S0003-4975(01)02665-0					Background. Adenosine-enhanced ischemic preconditioning extends the protection of ischemic preconditioning by both significantly decreasing infarct size and significantly enhancing postischemic functional recovery.Methods. The effects of adenosine-enhanced ischemic preconditioning on necrosis and apoptosis were investigated in the sheep heart using models of stunning (15 minutes regional ischemia…			Article			WOS
	Aguayo-Ulloa, Lorena; Carolina Perdomo-Ayola, Sandra		Animal welfare and carcass quality of hair sheep slaughtered in a meat processing plant from Cordoba, Colombia	no info	2021	REVISTA CORPOICA-CIENCIA Y TECNOLOGIA AGROPECUARIA	22	1	e1836				10.21930/rcta.vol22_num1_art:1836					A descriptive cross-sectional study was carried out at a slaughterhouse (SH) located in the Cordoba Department, Colombia. It aims to determine sheep transportation characteristics, pre-slaughter handling, and carcass quality indicators related to animal welfare. We observed 18 unloads and 883 sheep carcasses and recorded vehicle, journey, load data, animal handling characteristics at the SH, and …			Article			WOS
	More, Simon; Bicout, Dominique; Botner, Anette; Butterworth, Andrew; Calistri, Paolo; Depner, Klaus; Edwards, Sandra; Garin-Bastuji, Bruno; Good, Margaret; Schmidt, Christian Gortazar; Michel, Virginie; Miranda, Miguel Angel; Nielsen, Soren Saxmose; Velarde, Antonio; Thulke, Hans-Hermann; Sihvonen, Liisa; Spoolder, Hans; Stegeman, Jan Arend; Raj, Mohan; Willeberg, Preben; Candiani, Denise; Winckl…		Animal welfare aspects in respect of the slaughter or killing of pregnant livestock animals (cattle, pigs, sheep, goats, horses)	no info	2017	EFSA JOURNAL	15	5	4782				10.2903/j.efsa.2017.4782					This scientific opinion addresses animal welfare aspects of slaughtering of livestock pregnant animals. Term of Reference (ToR) 1 requested assessment of the prevalence of animals slaughtered in a critical developmental stage of gestation when the livestock fetuses might experience negative affect. Limited data on European prevalence and related uncertainties necessitated a structured expert know…			Article			WOS
	Toyoda, Y; Di Gregorio, V; Parker, RA; Levitsky, S; McCully, JD		Anti-stunning and anti-infarct effects of adenosine-enhanced ischemic preconditioning	no info	2000	CIRCULATION	102	19		326	331							Background-Adenosine-enhanced ischemic preconditioning (APC) extends the protection afforded by ischemic preconditioning (IPC) by both significantly decreasing infarct size and significantly enhancing post-ischemic functional recovery. In this study, the anti-infarct effects and the anti-stunning effects of APC in contributing to enhanced post-ischemic functional recovery were determined and comp…			Article			WOS
	Danso A.S.; Richardson R.I.; Khalid R.	57191196399; 9042974000; 56711039800	Assessment of the meat quality of lamb M. longissimus thoracis et lumborum and M. triceps brachii following three different Halal slaughter procedures	no info	2017	Meat Science	127			6	12	6	10.1016/j.meatsci.2016.12.014	5	https://www.scopus.com/inward/record.uri?eid=2-s2.0-85009089630&doi=10.1016%2fj.meatsci.2016.12.014&partnerID=40&md5=e08342e82b5f7806f9452d1b3f41aa7e	Division of Farm Animal Science University of Bristol, Langford, Bristol, BS40 5DU, United Kingdom; Euro Quality Lambs Ltd, Euro House, Dale Street, Craven Arms, Shropshire, SY7 9PA, United Kingdom	Danso A.S., Division of Farm Animal Science University of Bristol, Langford, Bristol, BS40 5DU, United Kingdom; Richardson R.I., Division of Farm Animal Science University of Bristol, Langford, Bristol, BS40 5DU, United Kingdom; Khalid R., Euro Quality Lambs Ltd, Euro House, Dale Street, Craven Arms, Shropshire, SY7 9PA, United Kingdom	A total of fifteen male and fifteen female lambs were allocated to three groups of ten animals and subjected to: traditional Halal slaughter without stunning (TNS); slaughter following electric head-only stunning (EHOS) or; post-cut electric head-only stun (PCEHOS) and their meat quality was determined. Instrumental and sensory analyses were carried out on two muscles; M. longissimus thoracis et …	Electric head-only stunning; Halal slaughter without stunning; Lamb; Meat quality; Post-cut electric head-only stunning	English	Article	Final	All Open Access; Green Open Access	Scopus	2-s2.0-85009089630
	Danso, A. S.; Richardson, R. I.; Khalid, R.		Assessment of the meat quality of lamb M-longissimus thoracis et lumborum and M-triceps brachii following three different Halal slaughter procedures	no info	2017	MEAT SCIENCE	127			6	12		10.1016/j.meatsci.2016.12.014					A total of fifteen male and fifteen female lambs were allocated to three groups of ten animals and subjected to: traditional Halal slaughter without stunning (TNS); slaughter following electric head-only stunning (EHOS) or; post-cut electric head-only stun (PCEHOS) and their meat quality was determined. Instrumental and sensory analyses were carried out on two muscles; M. longissimus thoracis et …			Article			WOS
	Jalil N.S.A.; Tawde A.V.; Zito S.; Sinclair M.; Fryer C.; Idrus Z.; Phillips C.J.C.	57204497052; 57204507601; 55967607000; 57189601512; 57202992211; 56040494900; 57216214020	Attitudes of the public towards halal food and associated animal welfare issues in two countries with predominantly Muslim and non-Muslim populations	no info	2018	PLoS ONE	13	10	e0204094				10.1371/journal.pone.0204094	17	https://www.scopus.com/inward/record.uri?eid=2-s2.0-85055832212&doi=10.1371%2fjournal.pone.0204094&partnerID=40&md5=d030c2b1d98280fc8c46b35a9321cbee	Centre for Animal Welfare and Ethics, School of Veterinary Sciences, University of Queensland, Gatton, QLD, Australia; Institute of Tropical Agriculture, Department of Animal Science, Universiti Putra Malaysia, Selangor, Malaysia; Animal Welfare Science and Education Department, Society for the Prevention of Cruelty to Animals New Zealand, New Lynn, Auckland, New Zealand	Jalil N.S.A., Centre for Animal Welfare and Ethics, School of Veterinary Sciences, University of Queensland, Gatton, QLD, Australia; Tawde A.V., Centre for Animal Welfare and Ethics, School of Veterinary Sciences, University of Queensland, Gatton, QLD, Australia; Zito S., Centre for Animal Welfare and Ethics, School of Veterinary Sciences, University of Queensland, Gatton, QLD, Australia, Animal …	Halal food is that which is permissible or lawful for Muslims to consume. Meat products must abide by a number of requirements in relation to their preparation, condition and content to be considered halal. We conducted a survey in order to assess the knowledge of, and attitudes towards, halal meat products in two contrasting countries, one with a majority non- Muslim population (Australia, respo…		English	Article	Final	All Open Access; Gold Open Access; Green Open Access	Scopus	2-s2.0-85055832212
	Polli V.A.; Nuñez A.J.C.; Mello R.O.; Carvalho S.; Restle J.; Costa P.T.; Barin J.S.; Nigeliskii A.F.; Pissinin D.; Vaz R.Z.	6603834816; 55362157700; 57194193616; 12807038100; 35577593500; 57201338192; 6603301127; 56444333800; 57208228721; 7005965488	Carcass traits and meat quality of lambs slaughtered during different seasonal conditions	no info	2022	Tropical Animal Health and Production	54	6	353				10.1007/s11250-022-03352-y	0	https://www.scopus.com/inward/record.uri?eid=2-s2.0-85140227649&doi=10.1007%2fs11250-022-03352-y&partnerID=40&md5=5bdc7b259b60749d0cceccc43dd25e71	Polytechnic School, Federal University of Santa Maria, RS, Santa Maria, Brazil; Department of Animal Science, Federal University of Goiás, GO, Goiânia, Brazil; Department of Technology and Food Science, Federal University of Santa Maria, RS, Santa Maria, Brazil; Department of Animal Science, Federal University of Santa Maria, RS, Santa Maria, Brazil; Department of Animal Science, Federal Universi…	Polli V.A., Polytechnic School, Federal University of Santa Maria, RS, Santa Maria, Brazil; Nuñez A.J.C., Department of Animal Science, Federal University of Goiás, GO, Goiânia, Brazil; Mello R.O., Department of Technology and Food Science, Federal University of Santa Maria, RS, Santa Maria, Brazil; Carvalho S., Department of Animal Science, Federal University of Santa Maria, RS, Santa Maria, Bra…	This study was conducted to evaluate the effects of slaughtering feedlot Texel lambs during different climatic conditions on carcass and meat quality traits. Twenty castrated male Texel lambs (21.8 ± 0.62 kg) were distributed to two treatments according to the climatic conditions during the finishing period and at pre-slaughter: warm season (WS; mean temperature of 23.4 °C and 77.5% relative humi…	Animal welfare; Pre-slaughter; Sheep; Temperature-humidity index; Thermal comfort	English	Article	Final		Scopus	2-s2.0-85140227649
	Paolucci G.; Cagnasso D.; Cassani F.; Pattono D.	56717338200; 56717621000; 56717431700; 6603451594	Council regulation (Ec) no. 1099/2009: State of the art and its application in a local health unit in piedmont, italy	no info	2015	Italian Journal of Food Safety	4	2	A4520	10	12	2	10.4081/ijfs.2015.4520	0	https://www.scopus.com/inward/record.uri?eid=2-s2.0-84936888029&doi=10.4081%2fijfs.2015.4520&partnerID=40&md5=b7d7c4b0da4ffd1666ba2bf270dec9fe	Servizio Veterinario Igiene degli Alimenti di origine Animale, ASLTO4, Italy; Dipartimento di Scienze Veterinarie, Università di Torino, Torino, Italy	Paolucci G., Servizio Veterinario Igiene degli Alimenti di origine Animale, ASLTO4, Italy; Cagnasso D., Servizio Veterinario Igiene degli Alimenti di origine Animale, ASLTO4, Italy; Cassani F., Servizio Veterinario Igiene degli Alimenti di origine Animale, ASLTO4, Italy; Pattono D., Dipartimento di Scienze Veterinarie, Università di Torino, Torino, Italy	In the last decade, the European Union has reinforced the concept of animal welfare throughout the food chain, from breeding to slaughtering. Studies and assessments of economic nature led to the adoption of Regulation EC 1099/2009 and at the end of 2014 this regulation will be applied to all the members involved in the food chain. For this reason several local health units organized different in…	Animal welfare; Reg.1099/2009; Slaughtering	English	Article	Final	All Open Access; Gold Open Access; Green Open Access	Scopus	2-s2.0-84936888029
	Anil, MH; Harbour, DA		Current stunning and slaughter methods in cattle and sheep - Potential for carcass contamination with central nervous tissue and microorganisms	no info	2001	FLEISCHWIRTSCHAFT	81	11		123	124							Current stunning methods have been Implicated in dissemination of brain tissue. Such dissemination poses a threat to public health In relation to possible slaughter of animals with preclinical BSE. Fragments of brain tissue were detected In the jugular venous blood of cattle and sheep slaughtered after the use of pneumatically-operated or conventional cartridge-operated penetrating captive bolt g…			Article			WOS
	Lascano, Elena Catalina; Negroni, Jorge A.; del Valle, Hector F.		Early preconditioning protection against stunning in conscious sheep. Role of KATP channels	no info	2009	MOLECULAR AND CELLULAR BIOCHEMISTRY	331	1-2		247	257		10.1007/s11010-009-0166-6					The aim of this study was to assess early preconditioning protection against stunning in conscious sheep and analyze the role of ATP-dependent potassium (KATP) channels in the protective mechanism. Chronically instrumented animals were submitted to a 12 min reversible ischemia and 2 h reperfusion. Early preconditioning, consisting of six 5 min occlusion-5 min reperfusion periods, followed by 45 m…			Article			WOS
	Vergara, H; Gallego, L		Effect of electrical stunning on meat quality of lamb	no info	2000	MEAT SCIENCE	56	4		345	349		10.1016/S0309-1740(00)00061-9					The effects of stunning on both initial and up to 2 weeks post mortem storage meat quality of Spanish Manchega breed lamb were studied. Twenty-four lambs were distributed into two groups. The first group (US; n = 12) were slaughtered without previous stunning. In the second group (ES; n = 12) animals were electrically stunned. Meat quality was assessed by examining pH, colour as L*, a*, b* values…			Article			WOS
	Boccardo, A.; Belloli, A.; Locatelli, V.; Morandi, N.; Baggiani, L.; Cavallone, E.; Palma, A.; Pravettoni, D.		Effect of lairage after transport in lambs slaughtered with islamic ritual	no info	2014	LARGE ANIMAL REVIEW	20	2		71	79							In Italy the consumption of sheep meat, and the resulting turnover of this market, is mainly related to the community of Muslim faith. The way in which an animal is slaughtered during religious slaughter, rises several discussions due to the absence of stunning during the ritual.Purpose - The purpose of this study was to evaluate the degree of stress of 40 lambs coming from Romania, slaughtered w…			Article			WOS
	Small, A.; McLean, D.; Owen, J. S.; Ralph, J.		Electromagnetic induction of insensibility in animals: a review	no info	2013	ANIMAL WELFARE	22	2		287	290		10.7120/09627286.22.2.287					The prevention of unnecessary suffering at slaughter is considered to be an imperative and, as such, the majority of animals slaughtered under industrial conditions are stunned prior to slaughter by mechanical, electrical or gas inhalation means. However, many Orthodox Jewish and Muslim communities do not accept pre-slaughter stunning. Those Jewish and Muslim communities that do accept pre-slaugh…			Article			WOS
	del Valle, HF; Lascano, EC; Negroni, JA; Crottogini, AJ		Glibenclamide effects on reperfusion-induced malignant arrhythmias and left ventricular mechanical recovery from stunning in conscious sheep	no info	2001	CARDIOVASCULAR RESEARCH	50	3		474	485		10.1016/S0008-6363(01)00209-7					Introduction: Sulfonylureas have been associated with a high incidence of cardiovascular death in diabetic patients treated with these drugs. Although the evidence on the cardiovascular effects of sulfonylureas is contradictory and scarce, many experiments have shown that the second-generation compound glibenclamide has a protective effect on mechanical function and against generation of malignan…			Article			WOS
	Sterza, A.; Falbo, M. K.; Sandini, I. E.; Pivatto, D. D.		Halal slaughter with and without stunning in sheep: implications on animal welfare and bleeding efficiency	no info	2020	ARQUIVO BRASILEIRO DE MEDICINA VETERINARIA E ZOOTECNIA	72	5		1838	1844		10.1590/1678-4162-11540					The objective of this study was to evaluate the implications on animal welfare and the sangria efficiency in halal slaugther with and without stunning in sheep. 102 sheep were appraised in a commercial slaugthter, divided randomly for the weight in two groups: with stunning (CI) and without stunning (SI). It was verified that the animals without stunning presented straighten signs and vocalizatio…			Article			WOS
	Coleman G.J.; Rice M.; Hemsworth P.H.	7102311508; 54794429300; 7004360643	Human-animal relationships at sheep and cattle abattoirs	no info	2012	Animal Welfare	21	SUPPL. 2		15	21	6	10.7120/096272812X13353700593329	23	https://www.scopus.com/inward/record.uri?eid=2-s2.0-84861321541&doi=10.7120%2f096272812X13353700593329&partnerID=40&md5=415aef38b44b9eb54e5cbf94476135eb	Animal Welfare Science Centre, School of Psychology and Psychiatry, Monash University, VIC 3800, Australia; Animal Welfare Science Centre, Melbourne School of Land and Environment, University of Melbourne, Parkville, VIC 3010, Australia; Animal Welfare Science Centre, Department of Primary Industries, Werribee, VIC 3030, 600 Sneydes Road, Australia	Coleman G.J., Animal Welfare Science Centre, School of Psychology and Psychiatry, Monash University, VIC 3800, Australia; Rice M., Animal Welfare Science Centre, Melbourne School of Land and Environment, University of Melbourne, Parkville, VIC 3010, Australia; Hemsworth P.H., Animal Welfare Science Centre, Department of Primary Industries, Werribee, VIC 3030, 600 Sneydes Road, Australia	There are accumulating international data in a number of livestock industries that show that a negative attitude by stockpeople towards interacting with pigs, dairy cattle and poultry is correlated with increased levels of fear and stress in farm animals and in turn reduced animal productivity. While most of this research has been on-farm, one study has shown similar attitude-behaviour correlatio…	Animal welfare; Attitudes; Cattle handling; Sheep; Slaughter; Stockperson	English	Article	Final		Scopus	2-s2.0-84861321541
	Schaeperkoetter, Morgan; Weller, Zachary; Kness, Danielle; Okkema, Cora; Grandin, Temple; Edwards-Callaway, Lily		Impacts of group stunning on the behavioral and physiological parameters of pigs and sheep in a small abattoir	no info	2021	MEAT SCIENCE	179		108538				10.1016/j.meatsci.2021.108538					This study investigated reactions of pigs (N = 148) and sheep (N = 77) to group stunning where animals were present for the slaughter of others. Mock stunning with an isolated animal was used as the control. In both species, there was little evidence to suggest a difference in blood glucose and cortisol with stun order (P >= 0.21). In pigs, lactate differed by stun order (P < 0.001). Control pigs…			Article			WOS
	Verhoeven, M. T. W.; Gerritzen, M. A.; Hellebrekers, L. J.; Kemp, B.		Indicators used in livestock to assess unconsciousness after stunning: a review	no info	2015	ANIMAL	9	2		320	330		10.1017/S1751731114002596					Assessing unconsciousness is important to safeguard animal welfare shortly after stunning at the slaughter plant. Indicators that can be visually evaluated are most often used when assessing unconsciousness, as they can be easily applied in slaughter plants. These indicators include reflexes originating from the brain stem (e.g. eye reflexes) or from the spinal cord (e.g. pedal reflex) and behavi…			Article			WOS
	Van De Vis H.; Kestin S.; Robb D.; Oehlenschläger J.; Lambooij B.; Münkner W.; Kuhlmann H.; Kloosterboer K.; Tejada M.; Huidobro A.; Otterå H.; Roth B.; Sørensen N.K.; Akse L.; Byrne H.; Nesvadba P.	23096319400; 7004016413; 7101817206; 55941691000; 7003797733; 6506808675; 7005389863; 6504436037; 35563216900; 6701716095; 55935147400; 7401678704; 7006364813; 6507985345; 57196629619; 6701398477	Is humane slaughter of fish possible for industry?	no info	2003	Aquaculture Research	34	3		211	220	9	10.1046/j.1365-2109.2003.00804.x	155	https://www.scopus.com/inward/record.uri?eid=2-s2.0-0242584401&doi=10.1046%2fj.1365-2109.2003.00804.x&partnerID=40&md5=8388c79535475a9ed2e0a39513eb0ae4	Netherlands Inst. Fish. Res. (RIVO), IJmuiden, Netherlands; University of Bristol, Dept. of Clinical Veterinary Science, Bristol, United Kingdom; Federal Res. Centre for Fisheries, Inst. for Fish. Technol./Fish Qual., Hamburg, Germany; Federal Res. Centre for Fisheries, Institute for Fishery Ecology, Hamburg, Germany; Instituto del Frio (CSIC), Madrid, Ciudad Universitaria s/n, Spain; Institute o…	Van De Vis H., Netherlands Inst. Fish. Res. (RIVO), IJmuiden, Netherlands, Netherlands Inst. Fish. Res. (RIVO), 1970 AB Ijmuiden, PO Box 68, Netherlands; Kestin S., University of Bristol, Dept. of Clinical Veterinary Science, Bristol, United Kingdom; Robb D., University of Bristol, Dept. of Clinical Veterinary Science, Bristol, United Kingdom; Oehlenschläger J., Federal Res. Centre for Fisheries,…	The objective was to evaluate industrial and research slaughter methods for Atlantic salmon (Salmo salar), gilt-head seabream (Sparus auratus) and eel (Anguilla anguilla) with respect to welfare and quality. As a general term of reference, an optimal slaughter method should render fish unconscious until death without avoidable excitement, pain or suffering prior to killing. For Atlantic salmon, c…	Atlantic salmon; Eel; Fish flesh quality; Gilt-head seabream; Humane slaughter; Stunning	English	Article	Final	All Open Access; Bronze Open Access	Scopus	2-s2.0-0242584401
	Chao, En-Chieh		Islam and Veterinary Science: Rethinking Animal Suffering Through Islamic Animal Ethics and the Evolving Definition of Halal Slaughter	no info	2022	FRONTIERS IN VETERINARY SCIENCE	9		785585				10.3389/fvets.2022.785585					In the midst of recent European activism against religious slaughter, the idea that religious slaughter is cruel to animals is often seen as commonsense, and the mandatory pre-slaughter stunning is often portrayed as the moral technology that assures animal welfare. Nevertheless, this portrayal seems to blur the fact that the current notion of animal welfare itself is built upon a changing select…			Article			WOS
	Anil, MH; Love, S; Helps, CR; McKinstry, JL; Brown, SN; Philips, A; Williams, S; Shand, A; Bakirel, T; Harbour, D		Jugular venous emboli of brain tissue induced in sheep by the use of captive bolt guns	no info	2001	VETERINARY RECORD	148	20		619	620		10.1136/vr.148.20.619					Emboli of central nervous tissue were detected in the jugular venous blood of two of 15 sheep stunned with a conventional cartridge-operated captive bolt gun and in two of 15 sheep stunned with a pneumatically activated gun. No emboli were detected in arterial blood from these sheep or in venous blood from sheep stunned electrically. Emboli from an animal with BSE could transmit the disease to pe…			Article			WOS
	Hötzel M.J.; Mota S.M.; Ludtke C.B.; Poletto R.	35563241700; 51663718600; 14058581800; 26030621800	Knowledge and attitudes of official inspectors at slaughterhouses in southern Brazil regarding animal welfare	no info	2018	Revista Brasileira de Zootecnia	47		e20170065				10.1590/rbz4720170065	5	https://www.scopus.com/inward/record.uri?eid=2-s2.0-85058489388&doi=10.1590%2frbz4720170065&partnerID=40&md5=9da2e4ec710e2646deded5db2dffe246	Universidade Federal de Santa Catarina, Departamento de Zootecnia e Desenvolvimento Rural, Laboratório de Etologia Aplicada e Bem-Estar Animal, Florianópolis, SC, Brazil; Ministério da Agricultura, Pecuária e Abastecimento, Secretaria de Desenvolvimento Agropecuário e Cooperativismo, Brasília, DF, Brazil; Instituto Federal de Educação, Ciência e Tecnologia do Rio Grande do Sul, Sertão, RS, Brazil	Hötzel M.J., Universidade Federal de Santa Catarina, Departamento de Zootecnia e Desenvolvimento Rural, Laboratório de Etologia Aplicada e Bem-Estar Animal, Florianópolis, SC, Brazil; Mota S.M., Universidade Federal de Santa Catarina, Departamento de Zootecnia e Desenvolvimento Rural, Laboratório de Etologia Aplicada e Bem-Estar Animal, Florianópolis, SC, Brazil; Ludtke C.B., Ministério da Agricu…	We assessed the views, knowledge, and attitudes of livestock inspectors working in federally inspected slaughterhouses in southern Brazil, the major pig and poultry processors in the country, regarding farm animal behavior and welfare, and factors that may influence animal welfare improvements at abattoirs. An online questionnaire with closed and open questions was sent to all the federally inspe…	Abattoir; Legislation; Survey; Veterinarian	English	Article	Final	All Open Access; Gold Open Access; Green Open Access	Scopus	2-s2.0-85058489388
	Erian I.; Sinclair M.; Phillips C.J.C.	57193556843; 57189601512; 57216214020	Knowledge of stakeholders in the livestock industries of east and southeast asia about welfare during transport and slaughter and its relation to their attitudes to improving animal welfare	no info	2019	Animals	9	3	99				10.3390/ani9030099	6	https://www.scopus.com/inward/record.uri?eid=2-s2.0-85065331028&doi=10.3390%2fani9030099&partnerID=40&md5=3b67adf0f1e653f73e81f9ba505531ea	Centre for Animal Welfare and Ethics, School of Veterinary Science, University of Queensland, Gatton, 4343, QLD, Australia	Erian I., Centre for Animal Welfare and Ethics, School of Veterinary Science, University of Queensland, Gatton, 4343, QLD, Australia; Sinclair M., Centre for Animal Welfare and Ethics, School of Veterinary Science, University of Queensland, Gatton, 4343, QLD, Australia; Phillips C.J.C., Centre for Animal Welfare and Ethics, School of Veterinary Science, University of Queensland, Gatton, 4343, QLD…	The World Organisation for Animal Health (OIE) sets standards and guidelines for international animal welfare for the international livestock trade. The growing economic advancement in the East and Southeast Asian region suggested the potential benefit of a research study to examine stakeholders’ understanding of animal welfare during the transport and slaughter of livestock. A survey of stakehol…	Animal welfare; Asia; Knowledge; Slaughter; Training; Transport	English	Article	Final	All Open Access; Gold Open Access; Green Open Access	Scopus	2-s2.0-85065331028
	Rahlves, T.; Hofmeister, S.		Kosher meat - food security of the Austrian Jewish community in the light of current legal developments	no info	2022	WIENER TIERARZTLICHE MONATSSCHRIFT	109		Doc5				10.5680/wtm000005					Current legal and social developments in Europe are leading to an uncertain future for the provision of kosher meat for Austrian Jews. We analyse parliamentary resolutions and aspirations and decisions of the European Court of Justice to provide the background to current legal events in the European Union. We also present and discuss Jewish regulations regarding food and the legal framework for p…			Article			WOS
	Bornez, R.; Linares, M. B.; Vergara, H.		Microbial quality and lipid oxidation of Manchega breed suckling lamb meat: Effect of stunning method and modified atmosphere packaging	no info	2009	MEAT SCIENCE	83	3		383	389		10.1016/j.meatsci.2009.06.010					The effect Of CO2 concentration and exposure time at stunning [80% CO2 for 90 s (G1): 90% CO2 for 90 s (G2): 90% CO2 for 60 s (0): 80% CO2 for 60 s (G4)] plus an electrically stunned control group (G5) was assessed for lipid oxidation (LO) and microbial levels, [total viable counts, lactic acid bacteria, Enterobacteriaceae and Pseudomonas spp.] in Manchega breed suckling lamb meat at 24 h and 7 d…			Article			WOS
	Iulietto, Maria Francesca; Sechi, Paola; Gaudenzi, Clelia Mansi; Grispoldi, Luca; Ceccarelli, Margherita; Barbera, Salvatore; Cenci-Goga, Beniamino Terzo		Noise assessment in slaughterhouses by means of a smartphone app	no info	2018	ITALIAN JOURNAL OF FOOD SAFETY	7	2	7053	79	82		10.4081/ijfs.2018.7053					Regulation (EC) No. 1099/2009 on the protection of animals at the time of killing establishes an obligation to spare animals any avoidable suffering or stress prior to their slaughter. Although it has been pointed out that stressors also include noise, which can cause suffering and affect the quality of the meat, current legislation does not set a limit for environmental noise in slaughterhouses.…			Article			WOS
	Johnson, C. B.; Gibson, T. J.; Stafford, K. J.; Mellor, D. J.		Pain perception at slaughter	no info	2012	ANIMAL WELFARE	21			113	122		10.7120/096272812X13353700593888					Recent developments related to quantitative analysis of the electroencephalogram (EEG) have allowed the experience of pain to be assessed more directly than has hitherto been possible. Variables derived from the EEG of animals anaesthetised using our minimal anaesthesia model respond to noxious stimulation in a manner similar to those from conscious animals. This methodology has been used in a va…			Article			WOS
	Li X.; Zito S.; Sinclair M.; Phillips C.J.C.	57202649811; 55967607000; 57189601512; 57216214020	Perception of animal welfare issues during Chinese transport and slaughter of livestock by a sample of stakeholders in the industry	no info	2018	PLoS ONE	13	6	e0197028				10.1371/journal.pone.0197028	17	https://www.scopus.com/inward/record.uri?eid=2-s2.0-85048974430&doi=10.1371%2fjournal.pone.0197028&partnerID=40&md5=a467f0abbd9c38d159c24f688ddb7ead	Centre for Animal Welfare and Ethics, School of Veterinary Science, University of Queensland, Gatton, QLD, Australia; Royal New Zealand Society for the Prevention of Cruelty to Animals, New Lynn, Auckland, New Zealand	Li X., Centre for Animal Welfare and Ethics, School of Veterinary Science, University of Queensland, Gatton, QLD, Australia; Zito S., Centre for Animal Welfare and Ethics, School of Veterinary Science, University of Queensland, Gatton, QLD, Australia, Royal New Zealand Society for the Prevention of Cruelty to Animals, New Lynn, Auckland, New Zealand; Sinclair M., Centre for Animal Welfare and Eth…	China is the world’s biggest livestock producer, and has a rapidly expanding intensive livestock production in response to growing demand. The large size of the country and geographical dispersion of the livestock production systems means that animals are often transported long distances to slaughter. This study investigated perceptions of animal welfare issues by stakeholders in the Chinese tran…		English	Article	Final	All Open Access; Gold Open Access; Green Open Access	Scopus	2-s2.0-85048974430
	Anil, MH; Love, S; Helps, CR; Harbour, DA		Potential for carcass contamination with brain tissue following stunning and slaughter in cattle and sheep	no info	2002	FOOD CONTROL	13	6-7	PII S0956-7135(01)00055-X	431	436		10.1016/S0956-7135(01)00055-X					The risk associated with the use of captive bolt guns (CBGs) in dissemination of brain tissue during preslaughter Stunning has been investigated. Such dissemination poses a threat to public health in relation to possible slaughter of animals with preclinical BSE. Fragments of brain tissue were detected in the jugular venous blood of cattle and sheep slaughtered after the use of a pneumatically op…			Article			WOS
	Gregory, N. G.; Shaw, F. D.; Whitford, J. C.; Patterson-Kane, J. C.		Prevalence of ballooning of the severed carotid arteries at slaughter in cattle, calves and sheep	no info	2006	MEAT SCIENCE	74	4		655	657		10.1016/j.meatsci.2006.05.021					Previous work in calves indicated that ballooning of the severed arteries is a potential concern in animals receiving a reversible stun before slaughter, and in animals not stunned before slaughter, as it could extend the duration of brain function before the animals die. This study determined the prevalence of ballooning of the carotid arteries in a total of 987 cattle, calves and lambs at slaug…			Article			WOS
	Njisane, Y. Z.; Muchenje, V.		Quantifying avoidance-related behaviour and bleeding times of sheep of different ages, sex and breeds slaughtered at a municipal and a commercial abattoirs	no info	2013	SOUTH AFRICAN JOURNAL OF ANIMAL SCIENCE	43	5		S38	S42		10.4314/sajas.v43i5.7					The effect of abattoir type, age, sheep breed and sex on avoidance-related behaviour and bleeding times at slaughter were determined. Castrates and ewes of different age groups and breeds were used. From the commercial abattoir, 90 castrates and 110 ewes were used while 66 castrates and 19 ewes were obtained from the municipal abattoir. Avoidance-related behaviour and bleeding times differed with…			Article			WOS
	Cenci-Goga, Beniamino T.; Sechi, Paola; Cuccurese, Antonio; Poeta, Antonio; De Angelis, Giuseppe; Marini, Paolo; Mattiacci, Carlo; Rossi, Roberto; Pezzato, Roberto; Salamano, Germana; Santori, Pasqualino		Religious Slaughter: Data from Surveys and Spot-Check Visits in Italy and Animal Welfare Issues	no info	2013	SOCIETY & ANIMALS	21	5		459	488		10.1163/15685306-12341311					The public is becoming increasingly concerned about how nonhuman animals are treated, and many studies show that European citizens are concerned about farm animal welfare. Religious slaughter has always been a controversial and emotive subject, caught between animal welfare considerations, cultural and human rights issues. There is considerable variation in current practices, and the rules regard…			Article			WOS
	Velarde A.; Rodriguez P.; Dalmau A.; Fuentes C.; Llonch P.; von Holleben K.V.; Anil M.H.; Lambooij J.B.; Pleiter H.; Yesildere T.; Cenci-Goga B.T.	6701775922; 56344028000; 24069754400; 53877285500; 35262824000; 6603656684; 7003722254; 55831704000; 37046391900; 6506983524; 6603228741	Religious slaughter: Evaluation of current practices in selected countries	no info	2014	Meat Science	96	1		278	287	9	10.1016/j.meatsci.2013.07.013	68	https://www.scopus.com/inward/record.uri?eid=2-s2.0-84882772393&doi=10.1016%2fj.meatsci.2013.07.013&partnerID=40&md5=16fb0f918ca4b03daaf30ea543951ecd	IRTA, Spain; BSI Schwarzenbek, Germany; University of Cardiff, United Kingdom; University of Perugia, Italy; ASG Veehourderij, Netherlands; Meat and Livestock, Australia; Istanbul Veteriner Hekimler Odasi, Turkey	Velarde A., IRTA, Spain; Rodriguez P., IRTA, Spain; Dalmau A., IRTA, Spain; Fuentes C., IRTA, Spain; Llonch P., IRTA, Spain; von Holleben K.V., BSI Schwarzenbek, Germany; Anil M.H., University of Cardiff, United Kingdom; Lambooij J.B., ASG Veehourderij, Netherlands; Pleiter H., Meat and Livestock, Australia; Yesildere T., Istanbul Veteriner Hekimler Odasi, Turkey; Cenci-Goga B.T., University of P…	As part of the project ". Religious slaughter (DIALREL): improving knowledge and expertise through dialogue and debate on issues of welfare, legislation and socio-economic aspects", this paper discusses an evaluation of current practices during Halal and Shechita slaughter in cattle, sheep, goats and poultry. During religious slaughter, animals are killed with and without stunning by a transverse…	Animal; Halal; Kosher; Shechita; Slaughter; Welfare	English	Article	Final		Scopus	2-s2.0-84882772393
	Hultgren J.; Algers B.; Atkinson S.; Ellingsen K.; Eriksson S.; Hreinsson K.; Nordensten L.; Valtari H.; Mejdell C.M.	6603785271; 6603842711; 55444032500; 36237611400; 57189843470; 57189848921; 57189847110; 57189848682; 6506960086	Risk assessment of sheep welfare at small-scale slaughter in Nordic countries, comparing with large-scale slaughter	no info	2016	Acta Veterinaria Scandinavica	58	1	34				10.1186/s13028-016-0217-4	3	https://www.scopus.com/inward/record.uri?eid=2-s2.0-84975256279&doi=10.1186%2fs13028-016-0217-4&partnerID=40&md5=af389cf63bd624f2920914a37cf4fc54	Swedish University of Agricultural Sciences, Department of Animal Environment and Health, P. O. Box 234, Skara, 53223, Sweden; Swedish University of Agricultural Sciences, Department of Animal Environment and Health, P. O. Box 234, Skara, 53223, Sweden; Swedish University of Agricultural Sciences, Department of Animal Environment and Health, P. O. Box 7068, Uppsala, 75007, Sweden; Norwegian Veter…	Hultgren J., Swedish University of Agricultural Sciences, Department of Animal Environment and Health, P. O. Box 234, Skara, 53223, Sweden; Algers B., Swedish University of Agricultural Sciences, Department of Animal Environment and Health, P. O. Box 234, Skara, 53223, Sweden; Atkinson S., Swedish University of Agricultural Sciences, Department of Animal Environment and Health, P. O. Box 7068, Up…	Background: During the pre-slaughter period, animals experience novel environment and procedures which may cause reduced welfare and suffering. Over the last decades, the slaughter industry has restructured into fewer and larger abattoirs, implying potential risks of transport stress, injuries, and impaired animal welfare. Since recently, however, there is growing interest in small-scale slaughte…	Abattoir; Animal welfare; Expert opinion; Hazard; Stress	English	Article	Final	All Open Access; Gold Open Access; Green Open Access	Scopus	2-s2.0-84975256279
	Berg, Charlotte; Botner, Anette; Browman, Howard; De Koeijer, Aline; Depner, Klaus; Domingo, Mariano; Ducrot, Christian; Edwards, Sandra; Fourichon, Christine; Koenen, Frank; More, Simon; Raj, Mohan; Sihvonen, Liisa; Spoolder, Hans; Stegeman, Jan Arend; Thulke, Hans-Hermann; Vagsholm, Ivar; Velarde, Antonio; Willeberg, Preben		Scientific Opinion on the scientific assessment of studies on electrical parameters for stunning of small ruminants (ovine and caprine species) EFSA Panel on Animal Health and Welfare (AHAW)	no info	2015	EFSA JOURNAL	13	2	4023				10.2903/j.efsa.2015.4023					The EFSA Panel on Animal Health and Welfare (AHAW Panel) was asked by the European Commission to deliver a scientific opinion on three studies evaluating electrical parameters for the stunning of lambs and kid goats. The Commission received the studies from the Spanish authorities. One study was in the form of a manuscript entitled 'Electrical stunning effectiveness with current levels lower than…			Article			WOS
	Pozzi P.S.; Waner T.	54418954700; 57225840641	Shechita (Kosher slaughtering) and European legislation; [La shechita (Macellazione ebraica) e la legislazione Europea]	no info	2017	Veterinaria Italiana	53	1		5	19	14	10.12834/VetIt.910.4625.2	1	https://www.scopus.com/inward/record.uri?eid=2-s2.0-85016963479&doi=10.12834%2fVetIt.910.4625.2&partnerID=40&md5=15735d0466678a8eee6c9ef2f22f3899	Veterinary Services, Ministry of Agriculture and Rural Development, Ministry of Agriculture, POB 12, Beit Dagan, 5025001, Israel; The Biological Institute, Ness Zyiona, Israel	Pozzi P.S., Veterinary Services, Ministry of Agriculture and Rural Development, Ministry of Agriculture, POB 12, Beit Dagan, 5025001, Israel; Waner T., The Biological Institute, Ness Zyiona, Israel	Shechita is the procedure of killing or slaughtering animals for food production, according to Jewish tradition and it is performed without prior stunning. USA and European legislations conditionally allow slaughter without prior stunning in the frame of religion freedom (USA) or religious/cultural traditions (EU); nevertheless some traditional events in Europe definitely represent a concern for …	Animal welfare; EU legislation; Pain; Shechita; Stunning; Unconsciousness	English	Article	Final		Scopus	2-s2.0-85016963479
	Albarracin H, William; Sanchez B, Ivan		Slaughter characterization of hair lambs from crosses with Colombian landraces	no info	2013	REVISTA MVZ CORDOBA	18	1		3370	3378		10.21897/rmvz.200					Objective. Evaluate the genetic effect of Dorper lambs crosses with Colombian landraces, fasting time and stunning in slaughter yields, blood glucose levels as a measure of stress and pH as carcass quality. Materials and methods. 60 Dorper lambs crosses with Colombian landraces feeding under grazing and semi-feedlot systems, 10 weeks old were used. 3 fasting times (6, 12 and 18 hours) and 2 stunn…			Article			WOS
	Buncic, S; McKinstry, J; Reid, CA; Anil, MH		Spread of microbial contamination associated with penetrative captive bolt stunning of food animals	no info	2002	FOOD CONTROL	13	6-7	PII S0956-7135(01)00054-8	425	430		10.1016/S0956-7135(01)00054-8					To determine whether penetrative stunning of animals can result in internal and/or external microbial contamination of meat, experimental animals (lambs) were inoculated with a marker organisms (nalidixic acid resistant Esherichia coli K 12 or Pseudomonas fluorescens) into the brain through the stun wound immediately after stunning by a cartridge-operated, penetrative captive bolt pistol. After t…			Article			WOS
	Stärk K.D.C.; Alonso S.; Dadios N.; Dupuy C.; Ellerbroek L.; Georgiev M.; Hardstaff J.; Huneau-Salaün A.; Laugier C.; Mateus A.; Nigsch A.; Afonso A.; Lindberg A.	7103319836; 37086956900; 55941317900; 55638502900; 6603665875; 57196060514; 57204936600; 16047500900; 25643163800; 52464104200; 36984096500; 35253313900; 55423918900	Strengths and weaknesses of meat inspection as a contribution to animal health and welfare surveillance	no info	2014	Food Control	39	1		154	162	8	10.1016/j.foodcont.2013.11.009	70	https://www.scopus.com/inward/record.uri?eid=2-s2.0-84888394663&doi=10.1016%2fj.foodcont.2013.11.009&partnerID=40&md5=c6a6a4bf491f7cfee26ee4313cceffdc	SAFOSO Inc., Bern, Switzerland; Royal Veterinary College, North Mymms, Hertfordshire, United Kingdom; French Agency for Food, Environmental and Occupational Health and Safety (ANSES), Epidemiology Unit, Lyon, France; Federal Institute for Risk Assessment, Berlin, Germany; European Food Safety Authority, Parma, Italy; French Agency for Food, Environmental and Occupational Health and Safety (ANSES)…	Stärk K.D.C., SAFOSO Inc., Bern, Switzerland, Royal Veterinary College, North Mymms, Hertfordshire, United Kingdom; Alonso S., Royal Veterinary College, North Mymms, Hertfordshire, United Kingdom; Dadios N., Royal Veterinary College, North Mymms, Hertfordshire, United Kingdom; Dupuy C., French Agency for Food, Environmental and Occupational Health and Safety (ANSES), Epidemiology Unit, Lyon, Fran…	Meat inspection (MI) is one of the most widely implemented and longest running systems of surveillance. It was primarily introduced to identify meat of animals that is not fit for human consumption. Additionally, MI was progressively recognised as a suitable source of data collection and for monitoring a broad spectrum of diseases and conditions concerning animal health and welfare. For Europe, M…	Animal welfare; Disease control programmes; Disease surveillance; Food safety	English	Article	Final	All Open Access; Green Open Access	Scopus	2-s2.0-84888394663
	Gavinelli A.; Kennedy T.; Simonin D.	9338174200; 56272400800; 36944170200	The application of humane slaughterhouse practices to large-scale culling	no info	2014	OIE Revue Scientifique et Technique	33	1		291	301	10	10.20506/rst.33.1.2280	6	https://www.scopus.com/inward/record.uri?eid=2-s2.0-84904361672&doi=10.20506%2frst.33.1.2280&partnerID=40&md5=642ea4bafc7489f4c1afe5d73d138d1d	Animal Welfare Unit, Health and Consumers, European Commission, Brussels, Belgium; Veterinary Public Health Inspection Service, Department of Agriculture, Food and the Marine, I-6Dublin, Kildare Street, Ireland	Gavinelli A., Animal Welfare Unit, Health and Consumers, European Commission, Brussels, Belgium; Kennedy T., Animal Welfare Unit, Health and Consumers, European Commission, Brussels, Belgium, Veterinary Public Health Inspection Service, Department of Agriculture, Food and the Marine, I-6Dublin, Kildare Street, Ireland; Simonin D., Animal Welfare Unit, Health and Consumers, European Commission, Br…	Mass culling is a strategy used in the management of infectious disease outbreaks. The risk of disease spread due to animal transportation often precludes the use of slaughterhouses for this purpose, though they have been used on occasion. Consequently, culling takes place in the less-than- standardised environment on the farm. Regardless of where the cull occurs, the methods chosen to handle and…	Abattoir; Competence; Culling; Disease; Epidemic; Humane killing; Killing; Monitoring; Personnel; Planning; Restraint; Slaughterhouse; Welfare	English	Article	Final		Scopus	2-s2.0-84904361672
	Vanhonacker F.; Verbeke W.; van Poucke E.; Pieniak Z.; Nijs G.; Tuyttens F.	23096108400; 55899801600; 13005182300; 8629911900; 57208946165; 6701341176	The Concept of Farm Animal Welfare: Citizen Perceptions and Stakeholder Opinion in Flanders, Belgium	no info	2012	Journal of Agricultural and Environmental Ethics	25	1		79	101	22	10.1007/s10806-010-9299-6	47	https://www.scopus.com/inward/record.uri?eid=2-s2.0-84856089290&doi=10.1007%2fs10806-010-9299-6&partnerID=40&md5=a18466c674ff31da3dcabd9dea0fec62	Department of Agricultural Economics, Ghent University, 9000 Ghent, Coupure links 653, Belgium; Animal Sciences, Institute for Agricultural and Fisheries Research, Ghent, Belgium	Vanhonacker F., Department of Agricultural Economics, Ghent University, 9000 Ghent, Coupure links 653, Belgium; Verbeke W., Department of Agricultural Economics, Ghent University, 9000 Ghent, Coupure links 653, Belgium; van Poucke E., Animal Sciences, Institute for Agricultural and Fisheries Research, Ghent, Belgium; Pieniak Z., Department of Agricultural Economics, Ghent University, 9000 Ghent, …	Several attempts to conceptualize farm animal welfare have been criticized for diverging reasons, among them often the failure to incorporate the public concern and opinion. This paper's objective is to develop a conception of farm animal welfare that starts from the public's perception and integrates the opinion of different stakeholder representatives, thus following a fork-to-farm approach. Fo…	Citizen; Confirmatory factor analysis; Construct validity; Definition; Farm animal welfare; Survey	English	Article	Final		Scopus	2-s2.0-84856089290
	Fuseini A.; Knowles T.G.	57189576150; 7005124141	The ethics of Halal meat consumption: Preferences of consumers in England according to the method of slaughter	no info	2020	Veterinary Record	186	19	32587044				10.1136/vr.105287	4	https://www.scopus.com/inward/record.uri?eid=2-s2.0-85087141953&doi=10.1136%2fvr.105287&partnerID=40&md5=ff8f423238b425dfd63b2de79d1edb80	School of Veterinary Science, University of Bristol, Bristol, United Kingdom	Fuseini A., School of Veterinary Science, University of Bristol, Bristol, United Kingdom; Knowles T.G., School of Veterinary Science, University of Bristol, Bristol, United Kingdom	Background The continued growth of the global Halal meat market has resulted in many mainstream businesses in the developed world trading in Halal products. A good understanding of Halal consumer behaviour with regard to their preference of meat according to the method of slaughter (pre-stunned or not) and the frequency of consumption is vital for the formulation of future animal welfare legislat…	animal welfare; beef; halal meat; lamb; slaughter; stunning	English	Article	Final	All Open Access; Green Open Access	Scopus	2-s2.0-85087141953
	Passantino A.	55975347000	Welfare of animals at slaughter and killing: A new regulation on the protection of animals at the time of killing	no info	2009	Journal fur Verbraucherschutz und Lebensmittelsicherheit	4	3		273	285	12	10.1007/s00003-009-0303-x	3	https://www.scopus.com/inward/record.uri?eid=2-s2.0-70350666248&doi=10.1007%2fs00003-009-0303-x&partnerID=40&md5=7e9c6f944dfc739ecb1379b708b713f9	Department of Veterinary Public Health, Faculty of Veterinary Medicine, University of Messina, 98168 Messina, Polo Universitario Annunziata, Italy	Passantino A., Department of Veterinary Public Health, Faculty of Veterinary Medicine, University of Messina, 98168 Messina, Polo Universitario Annunziata, Italy	Recently, the European Commission (EC) has published a proposal for a Council Regulation on the protection of animals at the time of killing. The proposed regulation will enhance the technical requirements of Directive 93/119/EC on the protection of animals at the time of slaughter or killing, which have not been amended since 1993. The main specific problems identified with the present EU legisl…	Animal welfare; European Commission; Legislation; Meat sector; Slaughter	English	Article	Final		Scopus	2-s2.0-70350666248
	Shyan M.R.; Fortune K.A.; King C.	6602586703; 6602249234; 7401525784	"Bark parks" - A study on interdog aggression in a limited-control environment	no slaughter context	2003	Journal of Applied Animal Welfare Science	6	1		25	32	7	10.1207/S15327604JAWS0601_02	18	https://www.scopus.com/inward/record.uri?eid=2-s2.0-0041784816&doi=10.1207%2fS15327604JAWS0601_02&partnerID=40&md5=51d10ecd114236a13df2a65105953873	Department of Psychology, Butler University, Indianapolis, IN 46208, 4600 Sunset Avenue, United States; IAMS Company R and D, Lewisburg, OH 45338, 6571 State Route 503 North, United States	Shyan M.R., Department of Psychology, Butler University, Indianapolis, IN 46208, 4600 Sunset Avenue, United States, IAMS Company R and D, Lewisburg, OH 45338, 6571 State Route 503 North, United States; Fortune K.A., Department of Psychology, Butler University, Indianapolis, IN 46208, 4600 Sunset Avenue, United States; King C., Department of Psychology, Butler University, Indianapolis, IN 46208, 4…	As limted-control dog parks become more popular, concerns arise about whether these parks encourage interdog aggression. Systematic observations made at 1 park over 72 hr across 8 months found that 28 conflicts or potential conflicts occurred (< 0.5%). Of these, 14 were clear aggressive episodes. Each lasted less than 1 min (< 0.33% of total observation time). There were 14 other incidents of pos…		English	Article	Final		Scopus	2-s2.0-0041784816
	Rodan I.; Dowgray N.; Carney H.C.; Carozza E.; Ellis S.L.H.; Heath S.; Niel L.; St Denis K.; Taylor S.	6603470682; 57204110586; 8507994300; 57218658147; 57933686800; 57201541682; 9133247800; 57225020117; 55974635000	2022 AAFP/ISFM Cat Friendly Veterinary Interaction Guidelines: Approach and Handling Techniques	no slaughter context	2022	Journal of Feline Medicine and Surgery	24	11		1093	1132	39	10.1177/1098612X221128760	3	https://www.scopus.com/inward/record.uri?eid=2-s2.0-85140174255&doi=10.1177%2f1098612X221128760&partnerID=40&md5=dd7881205f89262726326e72170cbbe7	Cat Behavior Solutions, Cat Care Clinic, Madison, WI, United States; International Society of Feline Medicine, International Cat Care, Tisbury, Wi ltshire, United Kingdom; Gem Veterinary Center, Emmett, ID, United States; The Cat LVT LLC, VA, United States; International Cat Care, Tisbury, Wiltshire, United Kingdom; Behavioural Referrals Veterinary Practice, Chester, United Kingdom; Ontario Veter…	Rodan I., Cat Behavior Solutions, Cat Care Clinic, Madison, WI, United States; Dowgray N., International Society of Feline Medicine, International Cat Care, Tisbury, Wi ltshire, United Kingdom; Carney H.C., Gem Veterinary Center, Emmett, ID, United States; Carozza E., The Cat LVT LLC, VA, United States; Ellis S.L.H., International Cat Care, Tisbury, Wiltshire, United Kingdom; Heath S., Behavioura…	Practical relevance: The ‘2022 AAFP/ISFM Cat Friendly Veterinary Interaction Guidelines: Approach and Handling Techniques’ (hereafter the ‘Cat Friendly Veterinary Interaction Guidelines’) support veterinary professionals with feline interactions and handling to reduce the impact of fear and other protective (negative) emotions, in so doing enhancing feline welfare and In implementing these Guidel…	anxiolytic; behavioral needs; Cat Friendly Clinic; Cat Friendly Practice; chemical restraint; cooperative care; feline emotions; handling; non-physical interactions; physical interactions	English	Article	Final		Scopus	2-s2.0-85140174255
	Calapai A.; Berger M.; Niessing M.; Heisig K.; Brockhausen R.; Treue S.; Gail A.	57193664847; 57193669028; 57193671934; 57193669373; 56313401000; 6701706021; 6603127620	A cage-based training, cognitive testing and enrichment system optimized for rhesus macaques in neuroscience research	no slaughter context	2017	Behavior Research Methods	49	1		35	45	10	10.3758/s13428-016-0707-3	59	https://www.scopus.com/inward/record.uri?eid=2-s2.0-85015666312&doi=10.3758%2fs13428-016-0707-3&partnerID=40&md5=53b0ff332212759383cd0b168d8d792f	Cognitive Neuroscience Laboratory, German Primate Center, Kellnerweg 4, Goettingen, 37077, Germany; Bernstein Center for Computational Neuroscience, Goettingen, Germany; Faculty of Biology and Psychology, Goettingen University, Goettingen, Germany	Calapai A., Cognitive Neuroscience Laboratory, German Primate Center, Kellnerweg 4, Goettingen, 37077, Germany; Berger M., Cognitive Neuroscience Laboratory, German Primate Center, Kellnerweg 4, Goettingen, 37077, Germany; Niessing M., Cognitive Neuroscience Laboratory, German Primate Center, Kellnerweg 4, Goettingen, 37077, Germany; Heisig K., Cognitive Neuroscience Laboratory, German Primate Ce…	In neurophysiological studies with awake non-human primates (NHP), it is typically necessary to train the animals over a prolonged period of time on a behavioral paradigm before the actual data collection takes place. Rhesus monkeys (Macaca mulatta) are the most widely used primate animal models in system neuroscience. Inspired by existing joystick- or touch-screen-based systems designed for a va…	Animal housing; Animal welfare; Automated testing; Behavioral management; Cognitive neuroscience; Environmental enrichment; Non-human primates	English	Article	Final	All Open Access; Green Open Access; Hybrid Gold Open Access	Scopus	2-s2.0-85015666312
	Petherick J.C.; Small A.H.; Mayer D.G.; Colditz I.G.; Ferguson D.M.; Stafford K.J.	36055008500; 7005344095; 7202303980; 7006070306; 7402014442; 7006270775	A comparison of welfare outcomes for weaner and mature Bos indicus bulls surgically or tension band castrated with or without analgesia: 2. Responses related to stress, health and productivity	no slaughter context	2014	Applied Animal Behaviour Science	157			35	47	12	10.1016/j.applanim.2014.05.005	16	https://www.scopus.com/inward/record.uri?eid=2-s2.0-84904390643&doi=10.1016%2fj.applanim.2014.05.005&partnerID=40&md5=294accd261d387ef9ecf4881a97d75f7	The University of Queensland, Queensland Alliance for Agriculture and Food Innovation, QLD 4701, PO Box 6014, N. Rockhampton, Australia; CSIRO Animal, Food and Health Sciences, Armidale, NSW, Australia; Department of Agriculture, Fisheries and Forestry, Eco-Sciences Precinct, Brisbane, QLD, Australia; Massey University, Palmerston North, New Zealand	Petherick J.C., The University of Queensland, Queensland Alliance for Agriculture and Food Innovation, QLD 4701, PO Box 6014, N. Rockhampton, Australia; Small A.H., CSIRO Animal, Food and Health Sciences, Armidale, NSW, Australia; Mayer D.G., Department of Agriculture, Fisheries and Forestry, Eco-Sciences Precinct, Brisbane, QLD, Australia; Colditz I.G., CSIRO Animal, Food and Health Sciences, Ar…	Tension banding castration of cattle is gaining favour because it is relatively simple to perform and is promoted by retailers of the banders as a humane castration method. Two experiments were conducted, under tropical conditions using Bos indicus bulls comparing tension banding (Band) and surgical (Surgical) castration of weaner (7-10 months old) and mature (22-25 months old) bulls with and wit…	Beef cattle; Castration; Cortisol; Inflammation; Ketoprofen; Pain	English	Article	Final	All Open Access; Green Open Access	Scopus	2-s2.0-84904390643
	Bethell E.J.; Khan W.; Hussain A.	8693220200; 55319932200; 56212648400	A deep transfer learning model for head pose estimation in rhesus macaques during cognitive tasks: Towards a nonrestraint noninvasive 3Rs approach	no slaughter context	2022	Applied Animal Behaviour Science	255		105708				10.1016/j.applanim.2022.105708	0	https://www.scopus.com/inward/record.uri?eid=2-s2.0-85137388948&doi=10.1016%2fj.applanim.2022.105708&partnerID=40&md5=d1d699f9021845d27dacac028eb1e4a8	School of Biological and Environmental Sciences, Liverpool John Moores University, Liverpool, L3 3AF, United Kingdom; School of Computer Science & Mathematics, Liverpool John Moores University, Liverpool, L3 3AF, United Kingdom; College of Engineering, University of Sharjah, United Arab Emirates	Bethell E.J., School of Biological and Environmental Sciences, Liverpool John Moores University, Liverpool, L3 3AF, United Kingdom; Khan W., School of Computer Science & Mathematics, Liverpool John Moores University, Liverpool, L3 3AF, United Kingdom; Hussain A., School of Computer Science & Mathematics, Liverpool John Moores University, Liverpool, L3 3AF, United Kingdom, College of Engineering, …	Head orientation is a measure of attention used in behavioral psychological research with non-human primates. It is used across a broad range of disciplines and settings, from the field to the laboratory. Field methods are time consuming with risk of coding bias and visibility issues with free-ranging animals. Laboratory methods may require restraint and use of invasive procedures. Automated syst…	3Rs; Animal behavior; Animal welfare; Attention bias; Deep gaze analysis; Deep learning; Head pose estimation; Macaca mulatta; Social threat	English	Article	Final	All Open Access; Green Open Access; Hybrid Gold Open Access	Scopus	2-s2.0-85137388948
	Jerlström J.; Berg C.; Karlsson A.H.; Wallenbeck A.; Hansson H.	57849892800; 7202716093; 57213921633; 14623468700; 7102496733	A formal model for assessing the economic impact of animal welfare improvements at bovine and porcine slaughter	no slaughter context	2022	Animal Welfare	31	3		361	371	10	10.7120/09627286.31.4.004	0	https://www.scopus.com/inward/record.uri?eid=2-s2.0-85136208104&doi=10.7120%2f09627286.31.4.004&partnerID=40&md5=b6ea679fa1881efb70660098f69d1718	Department of Animal Environment and Health, Faculty of Veterinary Medicine and Animal Sciences, Swedish University of Agricultural Sciences (SLU), Box 234, Skara, 532 23, Sweden; Department of Economics, Faculty of Natural Resources and Agricultural Sciences, Swedish University of Agricultural Sciences (SLU), Box 7013, Uppsala, 750 07, Sweden	Jerlström J., Department of Animal Environment and Health, Faculty of Veterinary Medicine and Animal Sciences, Swedish University of Agricultural Sciences (SLU), Box 234, Skara, 532 23, Sweden; Berg C., Department of Animal Environment and Health, Faculty of Veterinary Medicine and Animal Sciences, Swedish University of Agricultural Sciences (SLU), Box 234, Skara, 532 23, Sweden; Karlsson A.H., D…	The relationship between animal welfare at slaughter and slaughterhouse profitability is complex, with potential trade-offs between animal welfare costs and benefits. Slaughterhouses currently lack data support for decisions on investments that can improve both animal welfare and profitability. Therefore, this study mapped the economic impacts for slaughterhouse businesses of improved cattle and …	abattoir; animal welfare; cattle; economic impact; pigs; profitability	English	Article	Final	All Open Access; Green Open Access	Scopus	2-s2.0-85136208104
	LaFollette M.R.; O'Haire M.E.; Cloutier S.; Gaskill B.N.	57193847996; 36473660500; 35985407800; 25654789100	A happier rat pack: The impacts of tickling pet store rats on human-animal interactions and rat welfare	no slaughter context	2018	Applied Animal Behaviour Science	203			92	102	10	10.1016/j.applanim.2018.02.006	5	https://www.scopus.com/inward/record.uri?eid=2-s2.0-85042520479&doi=10.1016%2fj.applanim.2018.02.006&partnerID=40&md5=16b3fd13b9ec0ef911781077977b13f4	Department of Animal Sciences, College of Agriculture, Purdue University, West Lafayette, IN, United States; Center for the Human-Animal Bond, Department of Comparative Pathobiology, College of Veterinary Medicine, Purdue University, West Lafayette, IN, United States; Ottawa, Ontario, Canada	LaFollette M.R., Department of Animal Sciences, College of Agriculture, Purdue University, West Lafayette, IN, United States; O'Haire M.E., Center for the Human-Animal Bond, Department of Comparative Pathobiology, College of Veterinary Medicine, Purdue University, West Lafayette, IN, United States; Cloutier S., Ottawa, Ontario, Canada; Gaskill B.N., Department of Animal Sciences, College of Agric…	Rats find initial interactions with humans frightening, which can lead to negative affect, and poor welfare. A handling technique called “tickling” which mimics rat rough-and-tumble play, can be used to reduce these negative effects. When tickled, rats produce 50 kilohertz (kHz) ultrasonic vocalizations (USV) indicative of positive affect. During tickling, some rats consistently vocalize more (hi…	Animal handling; Animal welfare; Human-animal interaction; Play; Positive affective states; Rats	English	Article	Final		Scopus	2-s2.0-85042520479
	Raspa F.; Vervuert I.; Capucchio M.T.; Colombino E.; Bergero D.; Forte C.; Greppi M.; Cavallarin L.; Giribaldi M.; Antoniazzi S.; Cavallini D.; Valvassori E.; Valle E.	57193741950; 6603358614; 6603584480; 57206725055; 12784052900; 56432548200; 47861890200; 8271246400; 57204151581; 8271246100; 57202249924; 57218353817; 16647580200	A high-starch vs. high-fibre diet: effects on the gut environment of the different intestinal compartments of the horse digestive tract	no slaughter context	2022	BMC Veterinary Research	18	1	187				10.1186/s12917-022-03289-2	6	https://www.scopus.com/inward/record.uri?eid=2-s2.0-85130376097&doi=10.1186%2fs12917-022-03289-2&partnerID=40&md5=40559257714fddab8c450ed900c4a639	Department of Veterinary Sciences, University of Turin, Grugliasco, 10095, Italy; Faculty of Veterinary Medicine, Leipzig University, Leipzig, 04103, Germany; ISPA-CNR, Institute of Sciences of Food Production, Grugliasco, 10095, Italy; Department of Veterinary Sciences, University of Bologna, Ozzano dell’Emilia, 40064, Italy; Public veterinary service, ASL TO5, Chieri, 10023, Italy	Raspa F., Department of Veterinary Sciences, University of Turin, Grugliasco, 10095, Italy; Vervuert I., Faculty of Veterinary Medicine, Leipzig University, Leipzig, 04103, Germany; Capucchio M.T., Department of Veterinary Sciences, University of Turin, Grugliasco, 10095, Italy; Colombino E., Department of Veterinary Sciences, University of Turin, Grugliasco, 10095, Italy; Bergero D., Department …	Background: Horses are often fed high amounts of starch in their diets despite the well-established benefits of a fibre-based diet to promote gut health and animal welfare. The aim of the present study was to compare the effects of two different diets – one based on high amounts of starch (HS) vs. one base on high amounts of fibre (HF) – on specific parameters of the gut environment across differ…	Gut environment; Horse; Intestinal compartments; Particle size; Volatile fatty acids	English	Article	Final	All Open Access; Gold Open Access	Scopus	2-s2.0-85130376097
	Maboni G.; Davenport R.; Sessford K.; Baiker K.; Jensen T.K.; Blanchard A.M.; Wattegedera S.; Entrican G.; Tötemeyer S.	26635465100; 56311921200; 56312098200; 8925014000; 7401539687; 50761043300; 8121815500; 7003339226; 6602646060	A novel 3D skin explant model to study anaerobic bacterial infection	no slaughter context	2017	Frontiers in Cellular and Infection Microbiology	7	SEP	404				10.3389/fcimb.2017.00404	21	https://www.scopus.com/inward/record.uri?eid=2-s2.0-85031413316&doi=10.3389%2ffcimb.2017.00404&partnerID=40&md5=3939d523141bd5d0780a2ac3badf4def	School of Veterinary Medicine and Science, University of Nottingham, Nottingham, United Kingdom; National Veterinary Institute, Technical University of Denmark, Copenhagen, Denmark; Moredun Research Institute, Penicuik, United Kingdom	Maboni G., School of Veterinary Medicine and Science, University of Nottingham, Nottingham, United Kingdom; Davenport R., School of Veterinary Medicine and Science, University of Nottingham, Nottingham, United Kingdom; Sessford K., School of Veterinary Medicine and Science, University of Nottingham, Nottingham, United Kingdom; Baiker K., School of Veterinary Medicine and Science, University of No…	Skin infection studies are often limited by financial and ethical constraints, and alternatives, such as monolayer cell culture, do not reflect many cellular processes limiting their application. For a more functional replacement, 3D skin culture models offer many advantages such as the maintenance of the tissue structure and the cell types present in the host environment. A 3D skin culture model…	Bacterial infection; Dichelobacter nodosus; Ex vivo model; Footrot; Ovine pro-inflammatory cytokines; Skin culture	English	Article	Final	All Open Access; Gold Open Access; Green Open Access	Scopus	2-s2.0-85031413316
	Scollo A.; Bresciani C.; Romano G.; Tagliaferri L.; Righi F.; Parmigiani E.; Mazzoni C.	53982072500; 55819322500; 8293895200; 57211667351; 12804955500; 6507002441; 36456072400	A novel blood-sampling technique in lactating sows: The mammary vein route	no slaughter context	2019	Veterinary Journal	254		105397				10.1016/j.tvjl.2019.105397	1	https://www.scopus.com/inward/record.uri?eid=2-s2.0-85074794784&doi=10.1016%2fj.tvjl.2019.105397&partnerID=40&md5=aa3605ad46f73a76d46788ad27728af2	Swivet Research Snc, Via E. Che Guevara, Reggio Emilia, 55 - 42123, Italy; University of Parma, Strada del Taglio, Parma, 10 - 43126, Italy	Scollo A., Swivet Research Snc, Via E. Che Guevara, Reggio Emilia, 55 - 42123, Italy; Bresciani C., University of Parma, Strada del Taglio, Parma, 10 - 43126, Italy; Romano G., Swivet Research Snc, Via E. Che Guevara, Reggio Emilia, 55 - 42123, Italy; Tagliaferri L., Swivet Research Snc, Via E. Che Guevara, Reggio Emilia, 55 - 42123, Italy; Righi F., University of Parma, Strada del Taglio, Parma,…	In the pig industry, labour efficiency and animal welfare have become two of the most important factors for achieving technical goals and farming competitiveness. Blood sampling is one of the most common sample-collecting techniques, but routine on-field blood collection can be very demanding for farm operators and the welfare of the animals, in particular for lactating sows. The aim of this stud…	Blood samples; Labour; Mammary vein; Sow; Welfare	English	Article	Final		Scopus	2-s2.0-85074794784
	Lohmann S.; Eijken M.; Møldrup U.; Møller B.K.; Hunter J.; Moers C.; Ploeg R.J.; Baan C.C.; Jespersen B.; Keller A.K.	57211050005; 21233570300; 6507020387; 57205054418; 55581764000; 15065690100; 7005110856; 7006625147; 7003721841; 14052398200	A Pilot Study of Postoperative Animal Welfare as a Guidance Tool in the Development of a Kidney Autotransplantation Model with Extended Warm Ischemia	no slaughter context	2019	Transplantation Direct	5	11	e495				10.1097/TXD.0000000000000941	5	https://www.scopus.com/inward/record.uri?eid=2-s2.0-85083584641&doi=10.1097%2fTXD.0000000000000941&partnerID=40&md5=9ab7159a589ac97ef68d2771c5fdae69	Department of Clinical Medicine, Aarhus University, Aarhus, Denmark; Department of Renal Medicine, Aarhus University Hospital, Aarhus, Denmark; Department of Clinical Immunology, Aarhus University Hospital, Aarhus, Denmark; Department of Urology, Aarhus University Hospital, Aarhus, Denmark; Nuffield Department of Surgical Sciences, Oxford Biomedical Research Centre, University of Oxford, Oxford, …	Lohmann S., Department of Clinical Medicine, Aarhus University, Aarhus, Denmark, Department of Renal Medicine, Aarhus University Hospital, Aarhus, Denmark; Eijken M., Department of Renal Medicine, Aarhus University Hospital, Aarhus, Denmark, Department of Clinical Immunology, Aarhus University Hospital, Aarhus, Denmark; Møldrup U., Department of Urology, Aarhus University Hospital, Aarhus, Denmar…	Background. This pilot study aimed to maintain acceptable animal welfare in the development of a porcine autotransplantation model with severe and incremental renal ischemic injury, a model for usage in future intervention studies. Secondary aims were to develop and test methods to collect blood and urine without the need to restrain or use sedative and avoid transportation to optimize welfare of…		English	Article	Final	All Open Access; Gold Open Access; Green Open Access	Scopus	2-s2.0-85083584641
	Pereira M.A.; Santos R.; Nóbrega C.; Mega C.; Cruz R.; Esteves F.; Santos C.; Coelho C.; Mesquita J.R.; Vala H.; Santos-Gomes G.	33467893100; 56346877800; 49964961300; 36573662200; 57202264030; 34879741200; 56727396000; 56079061700; 57193913086; 6506530409; 6701519976	A Questionnaire-Based Survey on the Long-Term Management of Canine Leishmaniosis by Veterinary Practitioners	no slaughter context	2022	Animals	12	6	731				10.3390/ani12060731	1	https://www.scopus.com/inward/record.uri?eid=2-s2.0-85126655364&doi=10.3390%2fani12060731&partnerID=40&md5=20c8e2cd091e08102fe4fc5821427244	Instituto Politécnico de Viseu, Escola Superior Agrária de Viseu, Campus Politécnico, Viseu, 3504-510, Portugal; Global Health and Tropical Medicine (GHTM), Instituto de Higiene e Medicina Tropical (IHMT), Universidade Nova de Lisboa, UNL, Rua da Junqueira 100, Lisboa, 1349-008, Portugal; CERNAS—Research Centre for Natural Resources, Environment and Society, ESAV, Instituto Politécnico de Viseu, …	Pereira M.A., Instituto Politécnico de Viseu, Escola Superior Agrária de Viseu, Campus Politécnico, Viseu, 3504-510, Portugal, Global Health and Tropical Medicine (GHTM), Instituto de Higiene e Medicina Tropical (IHMT), Universidade Nova de Lisboa, UNL, Rua da Junqueira 100, Lisboa, 1349-008, Portugal, CERNAS—Research Centre for Natural Resources, Environment and Society, ESAV, Instituto Politécn…	Canine Leishmaniosis (CanL) is a chronic and potentially fatal disease. In economically disadvantaged regions, costs associated with long-term patient monitoring may determine that some owners decline veterinary follow-up of their dogs. This online, questionnaire-based survey aimed to assess how Portuguese veterinary practitioners perform long-term patient monitoring and recognize relapses. More …	Canine leishmaniosis; Long-term treatment; Questionnaire; Relapse; Veterinary follow-up	English	Article	Final	All Open Access; Gold Open Access; Green Open Access	Scopus	2-s2.0-85126655364
	Fluttert M.; Dalm S.; Oitzl M.S.	6602720956; 6603238706; 7004077814	A refined method for sequential blood sampling by tail incision in rats	no slaughter context	2000	Laboratory Animals	34	4		372	378	6	10.1258/002367700780387714	189	https://www.scopus.com/inward/record.uri?eid=2-s2.0-0033793850&doi=10.1258%2f002367700780387714&partnerID=40&md5=216a613078682c701db0aa1babc4d080	Leiden/Amsterdam Centre for Drug Research, Division of Medical Pharmacology, 2300 RA Leiden, PO Box 9503, Netherlands	Fluttert M., Leiden/Amsterdam Centre for Drug Research, Division of Medical Pharmacology, 2300 RA Leiden, PO Box 9503, Netherlands; Dalm S., Leiden/Amsterdam Centre for Drug Research, Division of Medical Pharmacology, 2300 RA Leiden, PO Box 9503, Netherlands; Oitzl M.S., Leiden/Amsterdam Centre for Drug Research, Division of Medical Pharmacology, 2300 RA Leiden, PO Box 9503, Netherlands	Levels of endogenous or administered substances can be estimated by blood sampling. This allows an evaluation of the relationship between clinical signs, physiological parameters, pharmacological treatments and behaviour of the animal. We show that blood samples can be taken occasionally as well as sequentially by means of a small incision at the end of the rats' tails. Up to 300 μl of blood can …	Animal welfare; Blood sampling; Corticosterone; Rat; Stress environment; Tail incision method	English	Article	Final	All Open Access; Bronze Open Access	Scopus	2-s2.0-0033793850
	Aliphon B.; Dai T.; Moretti J.; Penrose-Menz M.; Mulders W.H.A.M.; Blache D.; Rodger J.	57989518000; 57988835400; 57211022295; 57463111200; 6602069591; 57989110100; 7005395616	A repeated measures cognitive affective bias test in rats: comparison with forced swim test	no slaughter context	2022	Psychopharmacology							10.1007/s00213-022-06281-8	0	https://www.scopus.com/inward/record.uri?eid=2-s2.0-85143154716&doi=10.1007%2fs00213-022-06281-8&partnerID=40&md5=1453b1f70f62392416ac72e32b1605ed	School of Biological Sciences, University of Western Australia, Crawley, Australia; School of Human Sciences, University of Western Australia, 35 Stirling Highway, Crawley, 6009, WA, Australia; Perron Institute for Neurological and Translational Sciences, University of Western Australia, Nedlands, Australia; School of Agriculture and Environment, Institute of Agriculture, University of Western Au…	Aliphon B., School of Biological Sciences, University of Western Australia, Crawley, Australia, School of Human Sciences, University of Western Australia, 35 Stirling Highway, Crawley, 6009, WA, Australia; Dai T., School of Biological Sciences, University of Western Australia, Crawley, Australia; Moretti J., School of Biological Sciences, University of Western Australia, Crawley, Australia, Perro…	Rationale: There is an urgent need to identify behaviours in animals that can provide insight into the aetiology and potential treatment of depression in humans. Objectives: This study aimed to validate a repeated measures cognitive affective bias (CAB) test in a rat model of chronic stress and compare CAB with forced swim test (FST) measures. Methods: Male and female Sprague Dawley rats were tra…	Animal welfare; Antidepressant; Cognitive affective bias; Forced swim test; Mood disorders; Rodent models	English	Article	Article in press		Scopus	2-s2.0-85143154716
	Gravenor M.B.; Papasozomenos P.; McLean A.R.; Neophytou G.	7004369951; 6506004525; 7402638846; 6505976029	A scrapie epidemic in Cyprus	no slaughter context	2004	Epidemiology and Infection	132	4		751	760	9	10.1017/S0950268804002110	13	https://www.scopus.com/inward/record.uri?eid=2-s2.0-4143129042&doi=10.1017%2fS0950268804002110&partnerID=40&md5=1a6060e0d63d540e8eeb309409749c87	Institute for Animal Health, Compton Laboratory, Berkshire RG20 7NN, Compton, United Kingdom; Swansea Clinical School, University of Wales Swansea, Swansea SA2 8PP, United Kingdom; Department of Veterinary Services, Animal Health and Welfare Division, 1417 Nicosia, Cyprus; Department of Zoology, University of Oxford, Oxford OX1 3PS, United Kingdom	Gravenor M.B., Institute for Animal Health, Compton Laboratory, Berkshire RG20 7NN, Compton, United Kingdom, Swansea Clinical School, University of Wales Swansea, Swansea SA2 8PP, United Kingdom; Papasozomenos P., Department of Veterinary Services, Animal Health and Welfare Division, 1417 Nicosia, Cyprus; McLean A.R., Institute for Animal Health, Compton Laboratory, Berkshire RG20 7NN, Compton, U…	Scrapie is endemic in the sheep flocks of many countries, but good epidemiological information on this disease is scarce. Data on the initial stages of an epidemic are even more rare. We describe the ongoing epidemic of scrapie in Cyprus that has been tracked since it began in the mid-1980s. The early stages of the spread of scrapie from farm to farm, between 1985 and 2000, is analysed with a sim…		English	Article	Final	All Open Access; Bronze Open Access	Scopus	2-s2.0-4143129042
	Rutherford K.M.D.; Thompson C.S.; Thomson J.R.; Lawrence A.B.; Nielsen E.O.; Busch M.E.; Haugegaard S.; Sandøe P.	7007171616; 57201491741; 56423112800; 7203042046; 57192152835; 7202386895; 35310332700; 35570037700	A study of associations between gastric ulcers and the behaviour of finisher pigs	no slaughter context	2018	Livestock Science	212			45	51	6	10.1016/j.livsci.2018.03.013	7	https://www.scopus.com/inward/record.uri?eid=2-s2.0-85045118673&doi=10.1016%2fj.livsci.2018.03.013&partnerID=40&md5=8b35926173f2d3fc0d2de26db9196f7a	Animal Behaviour and Welfare, Animal and Veterinary Sciences Research Group, SRUC, West Mains Road, Edinburgh, EH9 3JG, Scotland, United Kingdom; SAC Consulting, Veterinary Services, Bush Estate, Penicuik, EH26 0QE, Scotland, United Kingdom; Danish Agriculture & Food Council, SEGES, Axelborg, Axeltorv 3, Copenhagen, DK-1609, Denmark; Department of Food and Resource Economics and Department of Vet…	Rutherford K.M.D., Animal Behaviour and Welfare, Animal and Veterinary Sciences Research Group, SRUC, West Mains Road, Edinburgh, EH9 3JG, Scotland, United Kingdom; Thompson C.S., Animal Behaviour and Welfare, Animal and Veterinary Sciences Research Group, SRUC, West Mains Road, Edinburgh, EH9 3JG, Scotland, United Kingdom; Thomson J.R., SAC Consulting, Veterinary Services, Bush Estate, Penicuik,…	Gastric ulcers are a common condition in finisher pigs. A study was conducted to investigate the hypothesis that gastric ulceration alters the behaviour of finisher pigs. Two one-hour observations (from video recordings) of home pen behaviour were conducted in finisher pigs, at two farms (one in Denmark and one in Scotland), in the days immediately prior to slaughter. Stomach condition was assess…	Behaviour; Gastric ulcer; Pigs; Welfare	English	Article	Final	All Open Access; Green Open Access	Scopus	2-s2.0-85045118673
	Marshall J.; Haley D.; Levison L.; Kelton D.F.; Miltenburg C.; Roche S.; Duffield T.F.	57220867474; 7005748674; 57006593900; 7003316905; 57189517730; 55038377500; 35567572100	A survey of dairy cattle farmers' management practices for cull cows in Ontario, Canada	no slaughter context	2022	Frontiers in Veterinary Science	9		974061				10.3389/fvets.2022.974061	0	https://www.scopus.com/inward/record.uri?eid=2-s2.0-85138275909&doi=10.3389%2ffvets.2022.974061&partnerID=40&md5=05ee9a97076491dfdb0728f70cd72c67	Department of Population Medicine, University of Guelph, Guelph, ON, Canada; Campbell Centre for the Study of Animal Welfare, University of Guelph, Guelph, ON, Canada; University of Guelph, Guelph, ON, Canada; ACER Consulting Limited, Guelph, ON, Canada; Ontario Ministry of Agriculture, Food and Rural Affairs, Elora, ON, Canada	Marshall J., Department of Population Medicine, University of Guelph, Guelph, ON, Canada; Haley D., Department of Population Medicine, University of Guelph, Guelph, ON, Canada, Campbell Centre for the Study of Animal Welfare, University of Guelph, Guelph, ON, Canada, University of Guelph, Guelph, ON, Canada; Levison L., Campbell Centre for the Study of Animal Welfare, University of Guelph, Guelph…	Removal of cows from dairy cattle production is a routine and unavoidable practice of the dairy industry and is often referred to as culling. The objectives of this study were to use a survey to describe current on-farm cull cow management, farmers' perception of cull cows' journeys to slaughter, and the adoption of current recommendations and regulations by Ontario dairy farmers. All Ontario dai…	cattle transportation; compromised cow; cull dairy cow; culling; farm management	English	Article	Final	All Open Access; Gold Open Access; Green Open Access	Scopus	2-s2.0-85138275909
	Wallgren T.; Westin R.; Gunnarsson S.	57192192522; 53872316400; 7004247570	A survey of straw use and tail biting in Swedish pig farms rearing undocked pigs	no slaughter context	2016	Acta Veterinaria Scandinavica	58	1	84				10.1186/s13028-016-0266-8	34	https://www.scopus.com/inward/record.uri?eid=2-s2.0-85000542414&doi=10.1186%2fs13028-016-0266-8&partnerID=40&md5=0a764636c6fe274ec6a9c35d3c98b56b	Swedish University of Agricultural Sciences, Department of Animal Environment and Health, PO-Box 234, Skara, 532 23, Sweden	Wallgren T., Swedish University of Agricultural Sciences, Department of Animal Environment and Health, PO-Box 234, Skara, 532 23, Sweden; Westin R., Swedish University of Agricultural Sciences, Department of Animal Environment and Health, PO-Box 234, Skara, 532 23, Sweden; Gunnarsson S., Swedish University of Agricultural Sciences, Department of Animal Environment and Health, PO-Box 234, Skara, 5…	Background: Tail biting is a common problem in intensive pig farming, affecting both welfare and production. Although routine tail docking is banned within the EU, it remains a common practice to prevent tail biting. Straw as environmental enrichment has been proposed as an alternative to tail docking, but its effectiveness against tail biting and function in manure handling systems have to be co…	Enrichment; Farmer survey; Fattening pigs; Finishing herd; Growing pigs; Intact tail; Manipulable material; Manure handling system; Nursery herd; Tail docking	English	Article	Final	All Open Access; Gold Open Access; Green Open Access	Scopus	2-s2.0-85000542414
	Bulens A.; Van Beirendonck S.; Van Thielen J.; Buys N.; Driessen B.	55535307500; 35089009900; 23399084700; 7003784053; 24079509100	A two-level pen for fattening pigs: Effects on behavior, performance, and postslaughter measurements	no slaughter context	2017	Journal of Animal Science	95	2		616	625	9	10.2527/jas2016.0831	8	https://www.scopus.com/inward/record.uri?eid=2-s2.0-85018374678&doi=10.2527%2fjas2016.0831&partnerID=40&md5=86c6614c1e852a877cb804a55e8d1e6a	KU Leuven, Faculty of Engineering Technology, Research Group Animal & Welfare, Kleinhoefstraat 4, Geel, 2440, Belgium; KU Leuven, Department of Biosystems, Research Group of Livestock Genetics, Kasteelpark Arenberg 30, Leuven, 3001, Belgium; Thomas More, Kleinhoefstraat 4, Geel, 2440, Belgium	Bulens A., KU Leuven, Faculty of Engineering Technology, Research Group Animal & Welfare, Kleinhoefstraat 4, Geel, 2440, Belgium, KU Leuven, Department of Biosystems, Research Group of Livestock Genetics, Kasteelpark Arenberg 30, Leuven, 3001, Belgium; Van Beirendonck S., KU Leuven, Faculty of Engineering Technology, Research Group Animal & Welfare, Kleinhoefstraat 4, Geel, 2440, Belgium; Van Thi…	Concurrent with a tendency toward higher slaughter weights of fattening pigs, minimum requirements for space allowance are increasing. Allowing pigs more space in existing standard pens, however, leads to a decrease in the number of pigs per pen, which jeopardizes the economic viability of the pig farm. A possible solution includes creating a twolevel pen by constructing a second level in an exis…	Behavior; Fattening pigs; Performance; Two-level pen	English	Article	Final		Scopus	2-s2.0-85018374678
	Labitt R.N.; Oxford E.M.; Davis A.K.; Butler S.D.; Daugherity E.K.	55425713700; 20433887200; 57222642998; 8583256800; 26532377700	A Validated Smartphone-based Electrocardiogram Reveals Severe Bradyarrhythmias during Immobilizing Restraint in Mice of Both Sexes and Four Strains	no slaughter context	2021	Journal of the American Association for Laboratory Animal Science	60	2		201	212	11	10.30802/AALAS-JAALAS-20-000069	2	https://www.scopus.com/inward/record.uri?eid=2-s2.0-85103607426&doi=10.30802%2fAALAS-JAALAS-20-000069&partnerID=40&md5=3ea8e2b9b49605cecf74a9fffaefa1c2	Center for Animal Resources and Education; Department of Molecular Medicine; Department of Biomedical Sciences, Cornell University, College of Veterinary Medicine, Ithaca, New York, United States; Department of Comparative Medicine, Stanford University, Stanford, California, United States	Labitt R.N., Center for Animal Resources and Education; Oxford E.M., Department of Molecular Medicine; Davis A.K., Department of Biomedical Sciences, Cornell University, College of Veterinary Medicine, Ithaca, New York, United States; Butler S.D., Department of Comparative Medicine, Stanford University, Stanford, California, United States; Daugherity E.K., Center for Animal Resources and Education	Mouse handling and restraint affect behavior, physiology, and animal welfare, yet little information is available on how various mouse restraint methods affect cardiovascular parameters. We validated the use of a smartphone-based ECG system in mice by performing simultaneous smartphone and telemetry ECG recordings in conscious, restrained mice and in anesthetized mice. We observed that mice held …	atrioventricular; AV; heart rate; HR; smartphone-ECG; SP-ECG; TEL-ECG; telemetry-ECG	English	Article	Final	All Open Access; Green Open Access	Scopus	2-s2.0-85103607426
	Wassink G.J.; King E.M.; Grogono-Thomas R.; Brown J.C.; Moore L.J.; Green L.E.	57197198348; 36186958100; 6602492975; 56169459200; 8570572000; 34975081200	A within farm clinical trial to compare two treatments (parenteral antibacterials and hoof trimming) for sheep lame with footrot	no slaughter context	2010	Preventive Veterinary Medicine	96	2023-02-01		93	103	10	10.1016/j.prevetmed.2010.05.006	87	https://www.scopus.com/inward/record.uri?eid=2-s2.0-77954384566&doi=10.1016%2fj.prevetmed.2010.05.006&partnerID=40&md5=7f1f9b32abe28566d1aaa91e24d51215	Department of Biological Sciences, University of Warwick, Coventry CV4 7AL, West Midlands, Gibbet Hill Rd, United Kingdom; School of Clinical Veterinary Science, University of Bristol, Langford, North Somerset BS40 5DU, Langford House, United Kingdom	Wassink G.J., Department of Biological Sciences, University of Warwick, Coventry CV4 7AL, West Midlands, Gibbet Hill Rd, United Kingdom; King E.M., Department of Biological Sciences, University of Warwick, Coventry CV4 7AL, West Midlands, Gibbet Hill Rd, United Kingdom; Grogono-Thomas R., School of Clinical Veterinary Science, University of Bristol, Langford, North Somerset BS40 5DU, Langford Hou…	From observational studies, farmers who use parenteral antibacterials to promptly treat all sheep with footrot (FR) or interdigital dermatitis (ID) have a prevalence of lameness of <2% compared with a prevalence of 9% lameness reported by farmers who treat lame sheep by trimming affected feet. We tested the hypothesis that prompt treatment of sheep lame with naturally developing FR or ID with par…	Clinical trial; Foot trimming; Footrot; Parenteral antibiotics; Productivity; Sheep; Welfare	English	Article	Final	All Open Access; Green Open Access	Scopus	2-s2.0-77954384566
	del Valle, HF; Lascano, EC; Negroni, JA; Crottogini, AJ		Absence of ischemic preconditioning protection in diabetic sheep hearts: Role of sarcolemmal KATP channel dysfunction	no slaughter context	2003	MOLECULAR AND CELLULAR BIOCHEMISTRY	249	1-2		21	30		10.1023/A:1024797530152					Sarcolemmal ATP-sensitive potassium (KATP) channels have been mentioned to participate in preconditioning protection. Since these channels are altered in diabetes, it would be possible that preconditioning does not develop in diabetic ( D) hearts. The purpose of this study was to assess whether early (EP) and late ( LP) ischemic preconditioning protect diabetic hearts against stunning in a consci…			Article			WOS
	Wolkers C.P.B.; Barbosa Junior A.; Menescal-de-Oliveira L.; Hoffmann A.	54379368700; 35078056000; 6701409383; 7401903165	Acute administration of a cannabinoid CB1 receptor antagonist impairs stress-induced antinociception in fish	no slaughter context	2015	Physiology and Behavior	142			37	41	4	10.1016/j.physbeh.2015.01.038	9	https://www.scopus.com/inward/record.uri?eid=2-s2.0-84922309745&doi=10.1016%2fj.physbeh.2015.01.038&partnerID=40&md5=510188b96c4a58b1a174b73230115428	School of Medicine of Ribeirão Preto, São Paulo University, Physiology Department, Bandeirantes Avenue 3900, Ribeirão Preto, SP, 14049-900, Brazil	Wolkers C.P.B., School of Medicine of Ribeirão Preto, São Paulo University, Physiology Department, Bandeirantes Avenue 3900, Ribeirão Preto, SP, 14049-900, Brazil; Barbosa Junior A., School of Medicine of Ribeirão Preto, São Paulo University, Physiology Department, Bandeirantes Avenue 3900, Ribeirão Preto, SP, 14049-900, Brazil; Menescal-de-Oliveira L., School of Medicine of Ribeirão Preto, São P…	This study evaluated the influence of the pre-treatment with AM251 (a cannabinoid type I receptor (CB1) selective antagonist) on the stress-induced antinociception promoted by restraint in the fish Leporinus macrocephalus. The application of 3 and 5min of restraint stress promoted an inhibition of the behavioural response to the subcutaneous injection of 3% formaldehyde (increase in locomotor act…	Endocannabinoid system; Formaldehyde test; Nociception; Pain; Stress; Welfare	English	Article	Final		Scopus	2-s2.0-84922309745
	Otten W.; Kanitz E.; Puppe B.; Tuchscherer M.; Brüssow K.P.; Nürnberg G.; Stabenow B.	56219157100; 56229328200; 57206530235; 55977867100; 7003983419; 35616440500; 6602237406	Acute and long term effects of chronic intermittent noise stress on hypothalamic-pituitary-adrenocortical and sympatho-adrenomedullary axis in pigs	no slaughter context	2004	Animal Science	78	2		271	283	12	10.1017/s1357729800054060	39	https://www.scopus.com/inward/record.uri?eid=2-s2.0-1942542284&doi=10.1017%2fs1357729800054060&partnerID=40&md5=9259e274490a65e9d330ba8f78301232	Research Unit Behavioural Physiology, Res. Inst. Biol. of Farm Animals, 18196 Dummerstorf, Germany; Research Unit Reproductive Biology, Res. Inst. Biol. of Farm Animals, 18196 Dummerstorf, Germany; Research Unit Genetics and Biometry, Res. Inst. Biol. of Farm Animals, 18196 Dummerstorf, Germany	Otten W., Research Unit Behavioural Physiology, Res. Inst. Biol. of Farm Animals, 18196 Dummerstorf, Germany; Kanitz E., Research Unit Behavioural Physiology, Res. Inst. Biol. of Farm Animals, 18196 Dummerstorf, Germany; Puppe B., Research Unit Behavioural Physiology, Res. Inst. Biol. of Farm Animals, 18196 Dummerstorf, Germany; Tuchscherer M., Research Unit Behavioural Physiology, Res. Inst. Bio…	Noise is a potential environmental stressor and has also been identified as an aversive stimulus during animal housing. The impact of a 4-week chronic intermittent noise exposure on plasma adrenaline, noradrenaline, ACTH, cortisol and behaviour was studied in 24 male castrated German Landrace pigs. Three treatment groups were formed : N1 animals were subjected to a daily stimulation with broad-ba…	Behaviour; Hormones; Noise; Pigs; Stress	English	Article	Final		Scopus	2-s2.0-1942542284
	Pessoa J.; McAloon C.; Rodrigues da Costa M.; García Manzanilla E.; Norton T.; Boyle L.	57211391096; 56609144400; 57207360597; 57203180770; 35273348100; 23491537100	Adding value to food chain information: using data on pig welfare and antimicrobial use on-farm to predict meat inspection outcomes	no slaughter context	2021	Porcine Health Management	7	1	55				10.1186/s40813-021-00234-x	2	https://www.scopus.com/inward/record.uri?eid=2-s2.0-85117355441&doi=10.1186%2fs40813-021-00234-x&partnerID=40&md5=ef25e0919ec80649b738eebbb1794818	Pig Development Department, Teagasc Animal and Grassland Research and Innovation Centre, Moorepark, Ireland; Section of Herd Health and Animal Husbandry, School of Veterinary Medicine, University College Dublin, Belfield, Ireland; M3-BIORES-Measure, Model and Manage Bioresponses, KU Leuven, Leuven, Belgium; Epidemiology Research Unit, Department of Veterinary and Animal Science, Northern Faculty,…	Pessoa J., Pig Development Department, Teagasc Animal and Grassland Research and Innovation Centre, Moorepark, Ireland, Section of Herd Health and Animal Husbandry, School of Veterinary Medicine, University College Dublin, Belfield, Ireland, M3-BIORES-Measure, Model and Manage Bioresponses, KU Leuven, Leuven, Belgium; McAloon C., Section of Herd Health and Animal Husbandry, School of Veterinary M…	Background: Using Food Chain Information data to objectively identify high-risk animals entering abattoirs can represent an important step forward towards improving on-farm animal welfare. We aimed to develop and evaluate the performance of classification models, using Gradient Boosting Machine algorithms that utilise accurate longitudinal on-farm data on pig health and welfare to predict condemn…	Boosted trees; Food chain information; Machine learning; Meat inspection; Pig; Welfare	English	Article	Final	All Open Access; Gold Open Access; Green Open Access	Scopus	2-s2.0-85117355441
	Haussmann M.F.; Carroll J.A.; Weesner G.D.; Daniels M.J.; Matteri R.L.; Lay Jr. D.C.	57521167900; 57203519439; 6701463307; 8099122300; 7006613856; 56746058400	Administration of ACTH to restrained, pregnant sows alters their pigs' hypothalamic-pituitary-adrenal (HPA) axis	no slaughter context	2000	Journal of Animal Science	78	9		2399	2411	12	10.2527/2000.7892399x	107	https://www.scopus.com/inward/record.uri?eid=2-s2.0-0034266009&doi=10.2527%2f2000.7892399x&partnerID=40&md5=56390e40ab9999c59734d81b7a8b25a1	Iowa State University, Ames, IA 50011-3150, United States; Animal Physiology Research Unit, ARS-USDA, Columbia, MO 65211, United States; Purdue University, West Lafayette, IN 47907, United States	Haussmann M.F., Iowa State University, Ames, IA 50011-3150, United States; Carroll J.A., Animal Physiology Research Unit, ARS-USDA, Columbia, MO 65211, United States; Weesner G.D., Purdue University, West Lafayette, IN 47907, United States; Daniels M.J., Iowa State University, Ames, IA 50011-3150, United States; Matteri R.L., Animal Physiology Research Unit, ARS-USDA, Columbia, MO 65211, United S…	This study was designed to examine the physiology and behavior of pigs whose dams were snared and then injected with ACTH during gestation. Administration of ACTH to dams during pregnancy has been shown to replicate the effects of prenatal stress in other species. Control sows (n = 8) were given no treatment, whereas the treatment sows (ACTH, n = 8) were immobilized by snaring the snout and then …	Adrenal Gland; Behavior; Corticotropin; Pigs; Stress	English	Article	Final		Scopus	2-s2.0-0034266009
	Gottardo F.; Brscic M.; Pozza G.; Ossensi C.; Contiero B.; Marin A.; Cozzi G.	8625094600; 24342690100; 24344392300; 24344398800; 6508201101; 56048514700; 35500532500	Administration of dexamethasone per os in finishing bulls. I. Effects on productive traits, meat quality and cattle behaviour as indicator of welfare	no slaughter context	2008	Animal	2	7		1073	1079	6	10.1017/S1751731108002024	25	https://www.scopus.com/inward/record.uri?eid=2-s2.0-44949219362&doi=10.1017%2fS1751731108002024&partnerID=40&md5=6e7295c5bd6bbd6805f1da340db31a0e	Department of Animal Science, University of Padua, Padua, Italy; Istituto Zooprofilattico Sperimentale Delle Venezie, Legnaro (PD), Italy	Gottardo F., Department of Animal Science, University of Padua, Padua, Italy; Brscic M., Department of Animal Science, University of Padua, Padua, Italy; Pozza G., Istituto Zooprofilattico Sperimentale Delle Venezie, Legnaro (PD), Italy; Ossensi C., Department of Animal Science, University of Padua, Padua, Italy; Contiero B., Department of Animal Science, University of Padua, Padua, Italy; Marin …	The study investigated the effects of prolonged oral administration of dexamethasone at a low daily dosage of 0.75 mg/head per day (Dexa) on beef cattle productive traits, behaviour and meat quality. In all, 14 finishing Marchigiana bulls were used in a trial that begun 56 days prior to slaughter, of which six bulls received treatment from day 5 to day 53, whereas the remaining animals were used …	Beef cattle; Behaviour; Dexamethasone; Growth performance; Meat quality	English	Article	Final	All Open Access; Hybrid Gold Open Access	Scopus	2-s2.0-44949219362
	Kjaer J.B.; Guémené D.	56231462500; 9633480900	Adrenal reactivity in lines of domestic fowl selected on feather pecking behavior	no slaughter context	2009	Physiology and Behavior	96	2		370	373	3	10.1016/j.physbeh.2008.10.023	32	https://www.scopus.com/inward/record.uri?eid=2-s2.0-58149484948&doi=10.1016%2fj.physbeh.2008.10.023&partnerID=40&md5=1a065f91785a466d00ec0f917323c4ca	Faculty of Agricultural Sciences, Dept. of Genetics and Biotechnology, DK-8830 Tjele, P.O. Box 50, Denmark; INRA, UR83-Unité de Recherches Avicoles, F-37380 Nouzilly, France	Kjaer J.B., Faculty of Agricultural Sciences, Dept. of Genetics and Biotechnology, DK-8830 Tjele, P.O. Box 50, Denmark; Guémené D., INRA, UR83-Unité de Recherches Avicoles, F-37380 Nouzilly, France	Domestic chicken lines of the White Leghorn layer type differing in their level of feather pecking have been developed by divergent selection specifically on feather pecking behavior. This paper describes an investigation of basal level, reactivity to manual restraint and maximal adrenal response to 1-24 ACTH in breeder birds of the sixth generation of selection (S6) and their control line. Birds…	Adaptation; Animal welfare; Corticosterone; Feather pecking; Genetic selection; Manual restraint; Stress	English	Article	Final		Scopus	2-s2.0-58149484948
	Guzmán D.A.; Lèche A.; Contarde C.B.; Nazar F.N.; Marin R.H.	22834063000; 26435434400; 57204584498; 24576850500; 7101784701	Adrenocortical responses in Japanese quail classified by their permanence in proximity to either low or high density of conspecifics	no slaughter context	2018	Poultry Science	97	11		4107	4112	5	10.3382/ps/pey269	3	https://www.scopus.com/inward/record.uri?eid=2-s2.0-85052861268&doi=10.3382%2fps%2fpey269&partnerID=40&md5=a9309745c562a6d5845bcdbbaadd8880	Universidad Nacional de Córdoba (UNC), Facultad de Ciencias Exactas, Físicas y Naturales, Instituto de Ciencia y Tecnología de los Alimentos (ICTA), Córdoba, Argentina; Consejo Nacional de Investigaciones Científicas y Técnicas (CONICET), Instituto de Investigaciones Biológicas y Tecnológicas (IIByT, CONICET-UNC), Córdoba, Argentina; Universidad Nacional de Córdoba, Facultad de Ciencias Exactas, …	Guzmán D.A., Universidad Nacional de Córdoba (UNC), Facultad de Ciencias Exactas, Físicas y Naturales, Instituto de Ciencia y Tecnología de los Alimentos (ICTA), Córdoba, Argentina, Consejo Nacional de Investigaciones Científicas y Técnicas (CONICET), Instituto de Investigaciones Biológicas y Tecnológicas (IIByT, CONICET-UNC), Córdoba, Argentina; Lèche A., Universidad Nacional de Córdoba, Faculta…	The density-related permanence test (DRP) is used to classify young birds (while in groups) according to their individual permanence in proximity to either a high or low density of conspecifics (HD or LD, respectively). The birds’ performance in DRP was associated with underlying differences in the social responses of their individuals. Quails in homogeneous groups of LD residents responded with …	Corticosterone; Density-related test; Social behavior; Stress response	English	Article	Final	All Open Access; Green Open Access; Hybrid Gold Open Access	Scopus	2-s2.0-85052861268
	Bračko A.; King C.E.	55850106500; 7401525778	Advantages of aviaries and the Aviary Database Project: A new approach to an old housing option for birds	no slaughter context	2014	International Zoo Yearbook	48	1		166	183	17	10.1111/izy.12035	12	https://www.scopus.com/inward/record.uri?eid=2-s2.0-84897433052&doi=10.1111%2fizy.12035&partnerID=40&md5=49094ea7728283a9b2950aa1bcdfbd39	Zoological Garden of Zagreb, Zagreb, 10000, Maksimirski perivoj bb, Croatia; Weltvogelpark Walsrode, AM Vogelpark, Walsrode, 29664, Germany	Bračko A., Zoological Garden of Zagreb, Zagreb, 10000, Maksimirski perivoj bb, Croatia; King C.E., Weltvogelpark Walsrode, AM Vogelpark, Walsrode, 29664, Germany	There is a trend in zoos to provide more naturalistic enclosures for animals in which they can carry out natural behaviours and, for most birds, an aviary presents the best opportunities to achieve this. Reasons for holding birds in aviaries, including education and visitor experience, breeding, behaviour, predation, veterinary issues, avoidance of invasive species and hybridization, welfare and …	Animal welfare; Aviary; Database; Enclosure; Enclosure design; Exhibit; Flight restraint; Information-sharing resource	English	Article	Final		Scopus	2-s2.0-84897433052
	Amory J.R.; Pearce G.P.	14036876500; 7102530970	Alarm pheromones in urine modify the behaviour of weaner pigs	no slaughter context	2000	Animal Welfare	9	2		167	175	8		15	https://www.scopus.com/inward/record.uri?eid=2-s2.0-0003183608&partnerID=40&md5=f6daa68ff51c9f4aa124d7d83143dd0d	Animal Science Research Centre, Harper Adams University College, Newport, Shropshire TF10 8NB, United Kingdom; EpiCentre, Inst. Vet., Anim. and Biomed. Sci., Massey University, Palmerston North, New Zealand	Amory J.R., Animal Science Research Centre, Harper Adams University College, Newport, Shropshire TF10 8NB, United Kingdom; Pearce G.P., Animal Science Research Centre, Harper Adams University College, Newport, Shropshire TF10 8NB, United Kingdom, EpiCentre, Inst. Vet., Anim. and Biomed. Sci., Massey University, Palmerston North, New Zealand	Pigs undergoing an alarming experience may produce olfactory stimuli (pheromones) in their urine, which may have consequences for the welfare of other pigs exposed to these stimuli. Twelve young adult female pigs (gilts) were restrained for 30min in feeding stalls (a potentially alarming experience) and any urine produced was collected. Six gilts had previously experienced the procedure (experien…	Alarm pheromones; Animal welfare; Behaviour; Feeding motivation; Pigs	English	Article	Final		Scopus	2-s2.0-0003183608
	Nájera F.; Hearn A.J.; Ross J.; Nathan S.; Revuelta L.	54987228100; 37001484600; 55604400300; 24830893200; 25650768300	Alterations in selected serum biochemistry values of free-ranging Bornean leopard cats (Prionailurus bengalensis borneoensis) captured by box traps	no slaughter context	2014	Veterinary Research Communications	38	3		265	269	4	10.1007/s11259-014-9605-2	4	https://www.scopus.com/inward/record.uri?eid=2-s2.0-84905916369&doi=10.1007%2fs11259-014-9605-2&partnerID=40&md5=e210837b02ec571e08a022376f5c3b04	Recanati-Kaplan Centre, Department of Zoology, University of Oxford, Oxford OX13 5QL, Tubney Abingdon Road, United Kingdom; Sabah Wildlife Department, Kota Kinabalu 88100, Sabah, Wisma Muis Block B, Malaysia; Veterinary College, Complutense University of Madrid, Ciudad Universitaria, 28040 Madrid, Avda Puerta de Hierro s/n, Spain	Nájera F., Recanati-Kaplan Centre, Department of Zoology, University of Oxford, Oxford OX13 5QL, Tubney Abingdon Road, United Kingdom, Sabah Wildlife Department, Kota Kinabalu 88100, Sabah, Wisma Muis Block B, Malaysia, Veterinary College, Complutense University of Madrid, Ciudad Universitaria, 28040 Madrid, Avda Puerta de Hierro s/n, Spain; Hearn A.J., Recanati-Kaplan Centre, Department of Zoolo…	Box-traps for capturing wild cats are widely used by researchers since it is one of the most effective methods for trapping these species. Although they are extensively utilised, the effects on the physiology of trapped felids remain unclear. Researchers frequently make judgements regarding the safety of such capture devices by examination of external injuries but often fail to take into consider…	Alanine aminotransferase; Aspartate aminotransferase; Capture; Leopard cat; Serum biochemistry	English	Article	Final		Scopus	2-s2.0-84905916369
	Cobbaut K.; Houf K.; Douidah L.; Van Hende J.; De Zutter L.	24337327400; 6603553916; 24337793500; 36141441700; 6701513915	Alternative sampling to establish the Escherichia coli O157 status on beef cattle farms	no slaughter context	2008	Veterinary Microbiology	132	2023-02-01		205	210	5	10.1016/j.vetmic.2008.04.031	15	https://www.scopus.com/inward/record.uri?eid=2-s2.0-51649098967&doi=10.1016%2fj.vetmic.2008.04.031&partnerID=40&md5=2ba218f662bc067a411d2eebe9207201	Ghent University, Faculty of Veterinary Medicine, Department of Veterinary Public Health and Food Safety, 9820 Merelbeke, Salisburylaan 133, Belgium	Cobbaut K., Ghent University, Faculty of Veterinary Medicine, Department of Veterinary Public Health and Food Safety, 9820 Merelbeke, Salisburylaan 133, Belgium; Houf K., Ghent University, Faculty of Veterinary Medicine, Department of Veterinary Public Health and Food Safety, 9820 Merelbeke, Salisburylaan 133, Belgium; Douidah L., Ghent University, Faculty of Veterinary Medicine, Department of Ve…	Prevalence of Escherichia coli O157 in cattle at the farm level is mostly determined by taking individually rectal samples. From the animal welfare point of view the collection of such samples on the farm is not advisable. The present study evaluated alternative sample types to assess the E. coli O157 status of cattle farms. Twelve closed cattle farms were visited twice with a time interval of 6-…	Alternative samples; Beef cattle; E. coli O157; Farm	English	Article	Final		Scopus	2-s2.0-51649098967
	Ponnampalam E.N.; Knight M.I.; Moate P.J.; Jacobs J.L.	6701719934; 35794447000; 6701453981; 55507292900	An alternative approach for sustainable sheep meat production: Implications for food security	no slaughter context	2020	Journal of Animal Science and Biotechnology	11	1	83				10.1186/s40104-020-00472-z	5	https://www.scopus.com/inward/record.uri?eid=2-s2.0-85088659706&doi=10.1186%2fs40104-020-00472-z&partnerID=40&md5=5191870f311723a1c8cb9d7df5eeb7a6	Animal Production Sciences, Agriculture Victoria Research, Department of Jobs, Precincts and Regions, Bundoora, 3083, VIC, Australia; Animal Production Sciences, Agriculture Victoria Research, Department of Jobs, Precincts and Regions, Hamilton, 3300, VIC, Australia; Animal Production Sciences, Agriculture Victoria Research, Department of Jobs, Precincts and Regions, Ellinbank, 3821, VIC, Austral…	Ponnampalam E.N., Animal Production Sciences, Agriculture Victoria Research, Department of Jobs, Precincts and Regions, Bundoora, 3083, VIC, Australia; Knight M.I., Animal Production Sciences, Agriculture Victoria Research, Department of Jobs, Precincts and Regions, Hamilton, 3300, VIC, Australia; Moate P.J., Animal Production Sciences, Agriculture Victoria Research, Department of Jobs, Precincts…	Background: A pelleted diet containing camelina hay (CAMH) or camelina meal (CAMM) as a supplement along with a control pellet (CONT) diet formulated with commonly available feeds during summer was used to investigate an alternative pathway for sustainable meat production. Sustainable meat production was based on a simple estimation of income from meat produced versus feed costs if animals were f…	Animal welfare; Environmental sustainability; Global demand; Livestock; Sheep meat; Summer feeding	English	Article	Final	All Open Access; Gold Open Access; Green Open Access	Scopus	2-s2.0-85088659706
	Sirovnik J.; Euteneuer P.; von Borstel U.K.	57198434471; 57260363900; 57260694900	An attempt to use sound-imprinting to attract broilers onto elevated platforms for night-time roosting	no slaughter context	2021	Applied Animal Behaviour Science	243		105448				10.1016/j.applanim.2021.105448	1	https://www.scopus.com/inward/record.uri?eid=2-s2.0-85115008446&doi=10.1016%2fj.applanim.2021.105448&partnerID=40&md5=aafc8164eb88eb69d8d5466200fe0470	Institute of Animal Welfare Science, Department of Farm Animals and Veterinary Public Health, University of Veterinary Medicine Vienna, Vienna, Austria; Division of Animal Husbandry, Behaviour and Welfare, Department of Animal Breeding and Genetics, Justus-Liebig University of Giessen, Giessen, Germany	Sirovnik J., Institute of Animal Welfare Science, Department of Farm Animals and Veterinary Public Health, University of Veterinary Medicine Vienna, Vienna, Austria, Division of Animal Husbandry, Behaviour and Welfare, Department of Animal Breeding and Genetics, Justus-Liebig University of Giessen, Giessen, Germany; Euteneuer P., Division of Animal Husbandry, Behaviour and Welfare, Department of …	Welfare of fast growing broilers is often compromised due to leg health issues. A more complex environment such as the provision of elevated platforms facilitates activity and improves leg health in fast growing broilers. Thus, encouraging the use of elevated platforms might further enhance leg health. Chickens are known to follow the mother to the elevated platforms to roost, and if the mother i…	Behaviour; Broiler chicken; Elevated platforms; Health; Welfare; White noise	English	Article	Final	All Open Access; Hybrid Gold Open Access	Scopus	2-s2.0-85115008446
	Fuseini A.; Sulemana I.	57189576150; 56007447400	An Exploratory Study of the Influence of Attitudes toward Animal Welfare on Meat Consumption in Ghana	no slaughter context	2018	Food Ethics	2	1		57	75	18	10.1007/s41055-018-0028-6	4	https://www.scopus.com/inward/record.uri?eid=2-s2.0-85070451317&doi=10.1007%2fs41055-018-0028-6&partnerID=40&md5=f1c3a7b2df1f01c61592db0525d9a665	School of Veterinary Science, University of Bristol, Langford, Bristol, BS40 5DU, United Kingdom; Department of Economics, University of Ghana, P.O. Box LG 57, Accra, Legon, Ghana	Fuseini A., School of Veterinary Science, University of Bristol, Langford, Bristol, BS40 5DU, United Kingdom; Sulemana I., Department of Economics, University of Ghana, P.O. Box LG 57, Accra, Legon, Ghana	Meat is an important source of nutrients for human health and wellbeing. However, because meat intake is reportedly linked to diseases such as obesity, cancer, cardiovascular diseases and other health problems, more and more people are reducing meat consumption in the developed world. Yet in developing countries, maternal and childhood malnutrition continue to bedevil people due to a lack of or i…	Animal transport; Animal welfare; Consumer behaviour, Meat quality; Meat consumption; Slaughter	English	Article	Final	All Open Access; Green Open Access	Scopus	2-s2.0-85070451317
	Hoeksma D.L.; Gerritzen M.A.; Lokhorst A.M.; Poortvliet P.M.	57193166837; 6603280400; 29467714900; 6506795851	An extended theory of planned behavior to predict consumers' willingness to buy mobile slaughter unit meat	no slaughter context	2017	Meat Science	128			15	23	8	10.1016/j.meatsci.2017.01.011	23	https://www.scopus.com/inward/record.uri?eid=2-s2.0-85011395277&doi=10.1016%2fj.meatsci.2017.01.011&partnerID=40&md5=3912f9122af64b183376158f5df512e9	Wageningen University, Netherlands	Hoeksma D.L., Wageningen University, Netherlands; Gerritzen M.A., Wageningen University, Netherlands; Lokhorst A.M., Wageningen University, Netherlands; Poortvliet P.M., Wageningen University, Netherlands	The current study investigated the determinants of consumers' intention to purchase meat from mobile slaughter units (MSU). The theory of planned behavior (TPB) and the value belief norm theory (VBN) were used as conceptual lenses to guide this investigation. We conducted a survey among 329 respondents in the Netherlands who buy meat for themselves and/or for others. The results indicated that (1…	Animal welfare; Consumer acceptance; Consumer decision making; Mobile slaughter units; Personal norms; Theory of planned behavior; Value belief norm theory	English	Article	Final	All Open Access; Hybrid Gold Open Access	Scopus	2-s2.0-85011395277
	Tufarelli V.; Laudadio V.; Casalino E.	24282077900; 6506337582; 7004453499	An extra-virgin olive oil rich in polyphenolic compounds has antioxidant effects in meat-type broiler chickens	no slaughter context	2016	Environmental Science and Pollution Research	23	7		6197	6204	7	10.1007/s11356-015-5852-1	38	https://www.scopus.com/inward/record.uri?eid=2-s2.0-84948152908&doi=10.1007%2fs11356-015-5852-1&partnerID=40&md5=de98a7cd9bc28b6b6cd977e5be0c3031	Department of Emergency and Organ Transplantation (DETO), Section of Veterinary Science and Animal Production, University of Study of Bari ‘Aldo Moro’, Valenzano, Bari, 70010, Italy; Department of Veterinary Medicine, University of Bari ‘Aldo Moro’, Valenzano, Bari, 70010, Italy	Tufarelli V., Department of Emergency and Organ Transplantation (DETO), Section of Veterinary Science and Animal Production, University of Study of Bari ‘Aldo Moro’, Valenzano, Bari, 70010, Italy; Laudadio V., Department of Emergency and Organ Transplantation (DETO), Section of Veterinary Science and Animal Production, University of Study of Bari ‘Aldo Moro’, Valenzano, Bari, 70010, Italy; Casali…	The aim of this study was to extend the knowledge on the antioxidant effect of extra-virgin olive oil (EVOO) in the liver of broiler chickens not subjected to any form of insult. A total of 120 male broiler chickens (Hubbard strain) were divided into three groups and fed ad libitum with three isoenergetic diets from hatching until slaughter age (49 days) on a completely randomized design. The die…	Antioxidative status; Chickens; Diet; Extra-virgin olive oil; Liver	English	Article	Final	All Open Access; Green Open Access	Scopus	2-s2.0-84948152908
	Haigh A.; Yun-Chou J.; O'Driscoll K.	55361864800; 57201978152; 55398803000	An investigation into the effectiveness of compressed straw blocks in reducing abnormal behaviour in growing pigs	no slaughter context	2019	Animal	13	11		2576	2585	9	10.1017/S1751731119000715	10	https://www.scopus.com/inward/record.uri?eid=2-s2.0-85065394418&doi=10.1017%2fS1751731119000715&partnerID=40&md5=af26e82474de6b024af538e1cfe3f5b4	Pig Development Department, Centre for Grassland Research and Innovation, Teagasc, Moorepark, Fermoy, Co., Cork, Ireland; Royal (Dick) School of Veterinary Studies, University of Edinburgh, Easter Bush, Midlothian, United Kingdom; Animal and Veterinary Sciences Research Group, SRUC, Roslin Institute Building, Easter Bush, Midlothian, United Kingdom; School of Biology and Environmental Sciences, U…	Haigh A., Pig Development Department, Centre for Grassland Research and Innovation, Teagasc, Moorepark, Fermoy, Co., Cork, Ireland, School of Biology and Environmental Sciences, University College Dublin, Ireland; Yun-Chou J., Pig Development Department, Centre for Grassland Research and Innovation, Teagasc, Moorepark, Fermoy, Co., Cork, Ireland, Royal (Dick) School of Veterinary Studies, Univers…	The provision of manipulable material to pigs is a legal requirement to ensure their good welfare. Loose straw is edible, chewable, investigable and manipulable, and has been proven to be effective in reducing abnormal behaviour. However, it is incompatible with slatted systems and therefore not a viable option for many intensive units. Thus, there is a need to identify enrichment materials that …	ear; enrichment; harmful behaviour; slatted systems; tail	English	Article	Final	All Open Access; Hybrid Gold Open Access	Scopus	2-s2.0-85065394418
	Seeiso T.M.; McCrindle C.M.E.	36057112100; 6701483152	An investigation of the quality of meat sold in Lesotho	no slaughter context	2009	Journal of the South African Veterinary Association	80	4		237	242	5	10.4102/jsava.v80i4.215	9	https://www.scopus.com/inward/record.uri?eid=2-s2.0-77952535712&doi=10.4102%2fjsava.v80i4.215&partnerID=40&md5=ea1dc7f5ff7847156e5b15bdc3c02b3d	Department of Paraclinical Sciences, Faculty of Veterinary Science, University of Pretoria, Onderstepoort 0110, Private Bag X04, South Africa	Seeiso T.M., Department of Paraclinical Sciences, Faculty of Veterinary Science, University of Pretoria, Onderstepoort 0110, Private Bag X04, South Africa; McCrindle C.M.E., Department of Paraclinical Sciences, Faculty of Veterinary Science, University of Pretoria, Onderstepoort 0110, Private Bag X04, South Africa	Since the closure of the Lesotho abattoir in 2003, only imported meat can be legally sold. However, it was estimated in 2007 that 80 % of the meat sold at butcheries comes from informal slaughter. The aim of this study was to investigate the situation. The number and location of informal butcheries in Lesotho (n = 143) were recorded and mapped using Geographical Information Systems. Observations …	Food poisoning; Informal slaughter; Lesotho; Microbiological hazards in meat; Zoonoses	English	Article	Final	All Open Access; Gold Open Access; Green Open Access	Scopus	2-s2.0-77952535712
	Magrin L.; Brscic M.; Armato L.; Contiero B.; Cozzi G.; Gottardo F.	56525437000; 24342690100; 57074108000; 6508201101; 35500532500; 8625094600	An overview of claw disorders at slaughter in finishing beef cattle reared in intensive indoor systems through a cross-sectional study	no slaughter context	2018	Preventive Veterinary Medicine	161			83	89	6	10.1016/j.prevetmed.2018.10.018	13	https://www.scopus.com/inward/record.uri?eid=2-s2.0-85055745525&doi=10.1016%2fj.prevetmed.2018.10.018&partnerID=40&md5=0c33aa380baeac643ed2fa62e12cfeba	Department of Animal Medicine, Production and Health, University of Padova, Viale dell'Università 16, 35020, Legnaro (PD), Italy	Magrin L., Department of Animal Medicine, Production and Health, University of Padova, Viale dell'Università 16, 35020, Legnaro (PD), Italy; Brscic M., Department of Animal Medicine, Production and Health, University of Padova, Viale dell'Università 16, 35020, Legnaro (PD), Italy; Armato L., Department of Animal Medicine, Production and Health, University of Padova, Viale dell'Università 16, 3502…	This cross-sectional study aimed to assess in post-mortem the prevalence of specific claw disorders and their location on the sole in hind feet of finishing beef cattle reared indoors under intensive production systems. Evaluation was made on animals that were introduced in the ordinary slaughterhouse planning, presumably with no signs of impaired locomotion or severe lameness. A total of 4292 hi…	Beef cattle; Claw disorder; Intensive system; Lesion score; Post-mortem evaluation; Welfare	English	Article	Final		Scopus	2-s2.0-85055745525
	Marx G.; Horn T.; Thielebein J.; Knubel B.; Von Borell E.	7202455092; 7103109787; 23568979400; 6508035589; 55911529700	Analysis of pain-related vocalization in young pigs	no slaughter context	2003	Journal of Sound and Vibration	266	3		687	698	11	10.1016/S0022-460X(03)00594-7	131	https://www.scopus.com/inward/record.uri?eid=2-s2.0-0141742165&doi=10.1016%2fS0022-460X%2803%2900594-7&partnerID=40&md5=35f7f50bc00cc0539425b6ff36176013	IASABM, Federal Agric. Res. Ctr. (FAL), 31535 Neustadt a. Rbge., Höltystr. 10, Germany; IABHVC, Martin-Luther-Univ. Halle-Wittenberg, 06108 Halle, Adam-Kuckhoff-Str. 35, Germany	Marx G., IASABM, Federal Agric. Res. Ctr. (FAL), 31535 Neustadt a. Rbge., Höltystr. 10, Germany; Horn T., IASABM, Federal Agric. Res. Ctr. (FAL), 31535 Neustadt a. Rbge., Höltystr. 10, Germany, IABHVC, Martin-Luther-Univ. Halle-Wittenberg, 06108 Halle, Adam-Kuckhoff-Str. 35, Germany; Thielebein J., IABHVC, Martin-Luther-Univ. Halle-Wittenberg, 06108 Halle, Adam-Kuckhoff-Str. 35, Germany; Knubel B…	The assessment of pain constitutes a major issues for animal welfare research. The objective of this study was to classify vocalizations during castration pain and to assess alterations in vocalizations under local anaesthesia. The alterations in vocalization were measured by multiparametric call analysis. A total of 4537 calls of 70 young pigs were evaluated. With the data of this study three ca…		English	Article	Final		Scopus	2-s2.0-0141742165
	Fina M.; Casellas J.; Manteca X.; Piedrafita J.	24402607400; 9245199300; 7003376536; 6603753822	Analysis of temperament development during the fattening period in the semi-feral bovine calves of the Alberes Massif	no slaughter context	2006	Animal Research	55	5		389	395	6	10.1051/animres:2006030	5	https://www.scopus.com/inward/record.uri?eid=2-s2.0-33751523321&doi=10.1051%2fanimres%3a2006030&partnerID=40&md5=39d16876f9208c24f1ca2d40dc4d2401	Grup de Recerca en Remugants, Departament de Ciència Animal I Dels Aliments, Universitat Autònoma de Barcelona, 08193 Bellaterra, Barcelona, Spain; Departament de Biologia Cel.lular, Fisiologia I Immunologia, Universitat Autònoma de Barcelona, 08193 Bellaterra, Barcelona, Spain	Fina M., Grup de Recerca en Remugants, Departament de Ciència Animal I Dels Aliments, Universitat Autònoma de Barcelona, 08193 Bellaterra, Barcelona, Spain; Casellas J., Grup de Recerca en Remugants, Departament de Ciència Animal I Dels Aliments, Universitat Autònoma de Barcelona, 08193 Bellaterra, Barcelona, Spain; Manteca X., Departament de Biologia Cel.lular, Fisiologia I Immunologia, Universi…	The aim of this study was to evaluate the progression of temperament in Alberes male calves during the fattening period. The Alberes breed is a semi-feral beef cattle breed of Catalonia (Spain) that lives endemically in the eastern extreme of the Pyrenees, a mountainous area. These animals were adapted to extensive management systems and their contact with humans was minimal until weaning. After …	Beef cattle; Calf behavior; Calf welfare; Cattle handling; Human-animal relation	English	Article	Final	All Open Access; Bronze Open Access	Scopus	2-s2.0-33751523321
	Marchi-Coelho C.; Costa-Ferreira W.; Reis-Silva L.L.; Crestani C.C.	57219354674; 57191169372; 57211641328; 14520967700	Angiotensinergic neurotransmissions in the medial amygdala nucleus modulate behavioral changes in the forced swimming test evoked by acute restraint stress in rats	no slaughter context	2021	Cells	10	5	1217				10.3390/cells10051217	2	https://www.scopus.com/inward/record.uri?eid=2-s2.0-85107431576&doi=10.3390%2fcells10051217&partnerID=40&md5=14eddfd2b8fafce70a5086092555a2ec	School of Pharmaceutical Sciences, São Paulo State University (UNESP), Araraquara, SP, 14800-903, Brazil; Joint UFSCar-UNESP Graduate Program in Physiological Sciences, São Carlos, SP, 13565-905, Brazil	Marchi-Coelho C., School of Pharmaceutical Sciences, São Paulo State University (UNESP), Araraquara, SP, 14800-903, Brazil; Costa-Ferreira W., School of Pharmaceutical Sciences, São Paulo State University (UNESP), Araraquara, SP, 14800-903, Brazil, Joint UFSCar-UNESP Graduate Program in Physiological Sciences, São Carlos, SP, 13565-905, Brazil; Reis-Silva L.L., School of Pharmaceutical Sciences, …	We investigated the role of angiotensin II type 1 (AT1 receptor) and type 2 (AT2 receptor) and MAS receptors present in the medial amygdaloid nucleus (MeA) in behavioral changes in the forced swimming test (FST) evoked by acute restraint stress in male rats. For this, rats received bilateral microinjection of either the selective AT1 receptor antagonist losartan, the selective AT2 receptor antago…	Amygdala; Angiotensin; Depression; Rodents; Stress	English	Article	Final	All Open Access; Gold Open Access	Scopus	2-s2.0-85107431576
	Fusi F.; Lorenzi V.; Franceschini G.; Compiani R.; Harper V.; Ginestreti J.; Ferrara G.; Sgoifo Rossi C.A.; Bertocchi L.	56865722600; 56507066000; 57219324361; 54784012100; 57219326949; 57198434588; 57208133541; 6507649556; 6602329652	Animal welfare and biosecurity assessment: A comparison between Italian and Irish beef cattle rearing systems	no slaughter context	2020	Animal Production Science	61	1		55	63	8	10.1071/AN19611	1	https://www.scopus.com/inward/record.uri?eid=2-s2.0-85092253812&doi=10.1071%2fAN19611&partnerID=40&md5=04f6411ac92934079d97462475f659cb	Italian National Reference Centre for Animal Welfare (CReNBA), Istituto Zooprofilattico Sperimentale della Lombardia e dell'Emilia Romagna 'Bruno Ubertini', Via A. Bianchi 9, Brescia, Italy; Freelance Veterinary Practitioner, Lodi, Italy; Freelance Veterinary Practitioner, Modena, Italy; Department of Health Animal Science and Food Safety, University of Milan, Via Celoria 10, Milano, Italy	Fusi F., Italian National Reference Centre for Animal Welfare (CReNBA), Istituto Zooprofilattico Sperimentale della Lombardia e dell'Emilia Romagna 'Bruno Ubertini', Via A. Bianchi 9, Brescia, Italy; Lorenzi V., Italian National Reference Centre for Animal Welfare (CReNBA), Istituto Zooprofilattico Sperimentale della Lombardia e dell'Emilia Romagna 'Bruno Ubertini', Via A. Bianchi 9, Brescia, Ita…	Context: European beef production is facing fresh challenges on various fronts: increasing public concern on animal welfare declining EU meat consumption and, conversely, expected growth in global demand for meat. The Italian National Reference Centre for Animal Welfare (CReNBA) has developed an assessment protocol for collecting information about beef cattle welfare and biosecurity conditions, w…	animal-based outcomes; biosecurity; farm sustainability; IZSLER/CReNBA; management-based indicators; resource-based indicators	English	Article	Final		Scopus	2-s2.0-85092253812
	Grandin T.	57204287640	Animal welfare and society concerns finding the missing link	no slaughter context	2014	Meat Science	98	3		461	469	8	10.1016/j.meatsci.2014.05.011	83	https://www.scopus.com/inward/record.uri?eid=2-s2.0-84905037549&doi=10.1016%2fj.meatsci.2014.05.011&partnerID=40&md5=678806e1dc9812de930f3834544300d2	Dept. of Animal Sciences, Colorado State University, Fort Collins, CO 80523, United States	Grandin T., Dept. of Animal Sciences, Colorado State University, Fort Collins, CO 80523, United States	Young adults in developed countries are distanced from agriculture and the meat industry needs to do a better job of communicating with them. A major welfare concern is slaughter without stunning. Other concerns, such as poor stunning or high levels of bruising, can be easily corrected by management who is committed to maintaining high standards. Another concern is biological system overload, occ…	Animal welfare; Cattle; Meloxicam (PubChem CID: 54677470); Pigs; Ractopamine (PubChem CID: 14010333); Sheep; Slaughter; Welfare auditing; Zilpaterol (PubChem CID: C10 11507658)	English	Article	Final	All Open Access; Hybrid Gold Open Access	Scopus	2-s2.0-84905037549
	Ma S.-A.; Kang H.-J.; Lee K.; Kim S.-A.; Han J.S.	57706439900; 57706440100; 57193210912; 57675798000; 43262252200	Animal Welfare Assessment in 16 Zoos in South Korea Using the Modified Animal Welfare Assessment Grid	no slaughter context	2022	Frontiers in Veterinary Science	9		860741				10.3389/fvets.2022.860741	0	https://www.scopus.com/inward/record.uri?eid=2-s2.0-85130638490&doi=10.3389%2ffvets.2022.860741&partnerID=40&md5=836f868899e5cf29597b204e4e9551f4	Department of Laboratory Animal Medicine, Institute for the 3Rs & Animal Welfare, College of Veterinary Medicine, Konkuk University, Seoul, South Korea; Center for Animal Welfare Research (CAWR), College of Veterinary Medicine and Research Institute for Veterinary Science, Seoul National University, Seoul, South Korea; University of California, Davis School of Veterinary Medicine, Davis, CA, Unit…	Ma S.-A., Department of Laboratory Animal Medicine, Institute for the 3Rs & Animal Welfare, College of Veterinary Medicine, Konkuk University, Seoul, South Korea; Kang H.-J., Center for Animal Welfare Research (CAWR), College of Veterinary Medicine and Research Institute for Veterinary Science, Seoul National University, Seoul, South Korea; Lee K., University of California, Davis School of Veteri…	Various assessment tools that have been proposed thus far have disadvantages in that they are complex, time-consuming, non-objective, and not convenient for assessing multiple zoos. This study aimed to develop a simple, objective, and reliable welfare assessment tool, the modified Animal Welfare Assessment Grid (AWAG), that can be applied in South Korea, where there is no licensing system for zoo…	animal welfare; animal welfare assessment grid; South Korea; zoo animal welfare; zoo animals; zoo welfare assessment	English	Article	Final	All Open Access; Gold Open Access	Scopus	2-s2.0-85130638490
	Ludtke C.B.; Costa O.A.D.; Roça R.O.; Silveira E.T.F.; Athayde N.B.; de Araújo A.P.; de Mello Jr. A.; de Azambuja N.C.	14058581800; 6508029067; 35611360300; 7006276959; 53869851600; 55201501500; 57200977146; 55201184600	Animal welfare at pre-slaughter handling and the influence on pork meat quality and on stress; [Bem-estar animal no manejo pré-abate e a influência na qualidade da carne suína e nos parâmetros fisilógicos do estresse physiological parameters]	no slaughter context	2012	Ciencia Rural	42	3		532	537	5	10.1590/S0103-84782012000300024	9	https://www.scopus.com/inward/record.uri?eid=2-s2.0-84860382240&doi=10.1590%2fS0103-84782012000300024&partnerID=40&md5=38d01b372f4bc82ebc92f84db9dacde6	Universidade Estadual Paulista Julio de Mesquita Filho (UNESP), Botucatu, SP, Brazil; Empresa Brasileira de Pesquisa Agropecuária, Embrapa Suínos e Aves (CNPSA), Distrito de Tamandua 89700-000, Concordia, SC, BR153, Km 110, CP 21, Brazil; Faculdade de Ciências Agronômicas, UNESP, Botucatu, SP, Brazil; Centro de Tecnologia de Carnes, Instituto de Tecnologia de Alimentos (ITAL), Campinas, SP, Brazil	Ludtke C.B., Universidade Estadual Paulista Julio de Mesquita Filho (UNESP), Botucatu, SP, Brazil; Costa O.A.D., Empresa Brasileira de Pesquisa Agropecuária, Embrapa Suínos e Aves (CNPSA), Distrito de Tamandua 89700-000, Concordia, SC, BR153, Km 110, CP 21, Brazil; Roça R.O., Faculdade de Ciências Agronômicas, UNESP, Botucatu, SP, Brazil; Silveira E.T.F., Centro de Tecnologia de Carnes, Instituto…	The effects of the loading/unloading systems have been evaluated (S1: vehicle 1, with mobile floor and using management board for conducting pigs, S2: vehicle 2, with fixed floor and using electric goads to conduct pigs) and genetic (A, B and C) on the physiochemical characteristics of the meat, skin damage and physiological parameters of stress. 120 castrated pigs have been used (average weight …	Animal welfare; Loading; Meat quality; Pigs; Transport	English	Article	Final	All Open Access; Gold Open Access; Green Open Access	Scopus	2-s2.0-84860382240
	Lange J.C.; Lange A.; Knierim U.	57289442300; 57211910771; 55959591600	Animal welfare consequences of organic boar fattening and occurrence of boar taint on five commercial farms	no slaughter context	2021	Animals	11	10	2929				10.3390/ani11102929	0	https://www.scopus.com/inward/record.uri?eid=2-s2.0-85116716989&doi=10.3390%2fani11102929&partnerID=40&md5=285d392a5a84cdb17cd6c554d3496a78	Farm Animal Behaviour and Husbandry Section, Faculty of Organic Agricultural Sciences, University of Kassel, Nordbahnhoftsr. 1a, Witzenhausen, 37213, Germany; Department of Animal Sciences, Livestock Systems, Georg-August-University, Albrecht-Thaer-Weg 3, Göttingen, 37075, Germany	Lange J.C., Farm Animal Behaviour and Husbandry Section, Faculty of Organic Agricultural Sciences, University of Kassel, Nordbahnhoftsr. 1a, Witzenhausen, 37213, Germany; Lange A., Department of Animal Sciences, Livestock Systems, Georg-August-University, Albrecht-Thaer-Weg 3, Göttingen, 37075, Germany; Knierim U., Farm Animal Behaviour and Husbandry Section, Faculty of Organic Agricultural Scien…	The welfare of male fattening pigs may be improved by refraining from castration, but may be compromised, in turn, by harmful social behaviour in groups of boars. In addition, boar taint may be problematic. This study aimed to evaluate these potential problems in boar fattening under commercial organic conditions. In total, 625 boars were compared with 433 barrows and 83 gilts regarding their soc…	Agonistic behaviour; Castration; Enriched housing; Lameness; Penis lesions; Skin lesions	English	Article	Final	All Open Access; Gold Open Access; Green Open Access	Scopus	2-s2.0-85116716989
	Valkova L.; Vecerek V.; Voslarova E.; Kaluza M.; Takacova D.; Brscic M.	35340082800; 6602593601; 12544593900; 57220584974; 6505893943; 24342690100	Animal welfare during transport: comparison of mortality during transport from farm to slaughter of different animal species and categories in the Czech Republic	no slaughter context	2022	Italian Journal of Animal Science	21	1		914	923	9	10.1080/1828051X.2022.2038038	2	https://www.scopus.com/inward/record.uri?eid=2-s2.0-85130689190&doi=10.1080%2f1828051X.2022.2038038&partnerID=40&md5=2ae944b1b91797b83e870235758034c0	Department of Animal Protection and Welfare and Veterinary Public Health, University of Veterinary Sciences Brno, Brno, Czech Republic; Department of Public Veterinary Medicine and Animal Welfare, University of Veterinary Medicine and Pharmacy in Kosice, Kosice, Slovakia; Department of Animal Medicine Production and Health (MAPS), University of Padova, PD, Legnaro, Italy	Valkova L., Department of Animal Protection and Welfare and Veterinary Public Health, University of Veterinary Sciences Brno, Brno, Czech Republic; Vecerek V., Department of Animal Protection and Welfare and Veterinary Public Health, University of Veterinary Sciences Brno, Brno, Czech Republic; Voslarova E., Department of Animal Protection and Welfare and Veterinary Public Health, University of V…	Animals may be subjected to various stressors during transport, which may compromise their health and welfare as well as meat quality. In the chain of operations between a farm and a slaughterhouse, animal transport is probably the most stressful and injurious stage. Data on mortality is commonly collected at slaughterhouse as a retrospective indicator of animal welfare during transport. Ten-year…	Dead on arrival; livestock; poultry; rabbits; road transportation in cages	English	Article	Final	All Open Access; Gold Open Access	Scopus	2-s2.0-85130689190
	Velarde A.; Fàbrega E.; Blanco-Penedo I.; Dalmau A.	6701775922; 7004306588; 56012050600; 24069754400	Animal welfare towards sustainability in pork meat production	no slaughter context	2015	Meat Science	109			13	17	4	10.1016/j.meatsci.2015.05.010	52	https://www.scopus.com/inward/record.uri?eid=2-s2.0-84937164161&doi=10.1016%2fj.meatsci.2015.05.010&partnerID=40&md5=c0da261db8a4d191ff01f7a89b7a9f19	Animal Welfare Subprogram, IRTA, Veïnat de Sies s/n, Monells, Girona, 17121, Spain	Velarde A., Animal Welfare Subprogram, IRTA, Veïnat de Sies s/n, Monells, Girona, 17121, Spain; Fàbrega E., Animal Welfare Subprogram, IRTA, Veïnat de Sies s/n, Monells, Girona, 17121, Spain; Blanco-Penedo I., Animal Welfare Subprogram, IRTA, Veïnat de Sies s/n, Monells, Girona, 17121, Spain; Dalmau A., Animal Welfare Subprogram, IRTA, Veïnat de Sies s/n, Monells, Girona, 17121, Spain	Animal welfare is an important pillar of sustainability in meat production and is associated with other aspects of this concept, such as animal health, productivity, food safety, food quality and efficiency from a cost of production perspective. These interactions are present at all stages of the production cycle, from the beginning of the animals' farm life until their slaughter. On farm, some o…	Animal welfare; Farm; Meat production; Pigs; Slaughter; Sustainability; Transport	English	Article	Final		Scopus	2-s2.0-84937164161
	Sechi P.; Baldinelli C.; Iulietto M.F.; Cenci Goga B.T.	43861693800; 56993788700; 56346699100; 6603228741	Animal welfare: Data from an online consultation	no slaughter context	2015	Italian Journal of Food Safety	4	4					10.4081/ijfs.2015.5504	3	https://www.scopus.com/inward/record.uri?eid=2-s2.0-84949256964&doi=10.4081%2fijfs.2015.5504&partnerID=40&md5=2348232a016cfaa0d93defc928e6de36	Department of Veterinary Medicine, Laboratory of Food Inspection, University of Perugia, Perugia, Italy	Sechi P., Department of Veterinary Medicine, Laboratory of Food Inspection, University of Perugia, Perugia, Italy; Baldinelli C., Department of Veterinary Medicine, Laboratory of Food Inspection, University of Perugia, Perugia, Italy; Iulietto M.F., Department of Veterinary Medicine, Laboratory of Food Inspection, University of Perugia, Perugia, Italy; Cenci Goga B.T., Department of Veterinary Me…	This paper analyses data obtained from an online survey related to animal welfare and religious slaughter topics. The questionnaire was conducted with the purpose of examining the purchase behaviour of a group of consumers (with different religious orientation) and their views on animal protection and ritual slaughter. The main results of the consultation were two: the first evidenced the respond…	Animal welfare; Consumers; Religious slaughter	English	Article	Final	All Open Access; Gold Open Access; Green Open Access	Scopus	2-s2.0-84949256964
	Jacobs L.; Delezie E.; Duchateau L.; Goethals K.; Tuyttens F.A.M.	25825104400; 8669928400; 7004057403; 24491717600; 6701341176	Animal well-being and behavior: Broiler chickens dead on arrival: Associated risk factors and welfare indicators	no slaughter context	2017	Poultry Science	96	2		259	265	6	10.3382/ps/pew353	38	https://www.scopus.com/inward/record.uri?eid=2-s2.0-85014064322&doi=10.3382%2fps%2fpew353&partnerID=40&md5=1b19e9bb36a5e527fe16a8d7646f7a5e	Animal Sciences Unit, Institute for Agricultural and Fisheries Research (ILVO), Scheldeweg 68, Melle, 9090, Belgium; Faculty of Veterinary Medicine, Ghent University, Salisburylaan 133, Merelbeke, 9820, Belgium	Jacobs L., Animal Sciences Unit, Institute for Agricultural and Fisheries Research (ILVO), Scheldeweg 68, Melle, 9090, Belgium, Faculty of Veterinary Medicine, Ghent University, Salisburylaan 133, Merelbeke, 9820, Belgium; Delezie E., Animal Sciences Unit, Institute for Agricultural and Fisheries Research (ILVO), Scheldeweg 68, Melle, 9090, Belgium; Duchateau L., Faculty of Veterinary Medicine, G…	The pre-slaughter phase of the production process has potentially important animal welfare implications, including mortality (recorded as "Dead on Arrivals"; DOA). To reduce DOA%, specific risk factors need to be identified. DOA% can also be used as a first and quick screening of pre-slaughter broiler welfare under commercial conditions. The aim of the present study was to identify risk factors f…	Broiler welfare; DOA; Mortality; Pre-slaughter phase; Risk factor	English	Article	Final	All Open Access; Hybrid Gold Open Access	Scopus	2-s2.0-85014064322
	McManus P.	35618687600	Animal-based entertainment industries, animal death and Social Licence to Operate (SLO): an analysis of ‘The Final Race’ and the 2019 Melbourne Cup	no slaughter context	2022	Social and Cultural Geography							10.1080/14649365.2022.2053194	2	https://www.scopus.com/inward/record.uri?eid=2-s2.0-85126683596&doi=10.1080%2f14649365.2022.2053194&partnerID=40&md5=77b2ab82d69716289a61eeb89668445e	School of Geosciences, The University of Sydney, Sydney, NSW, Australia	McManus P., School of Geosciences, The University of Sydney, Sydney, NSW, Australia	Animal-based entertainment industries, predicated on asymmetrical human-animal relations, often operate legally but face growing opposition, focused particularly on animal death. In 2019, the documentary ‘The Final Race’ screened about two weeks before Australia’s most famous thoroughbred horse race, the Melbourne Cup, and exposed the secretive slaughter of unwanted racehorses in the ‘deep backst…	animal death; animal geography; Animal welfare; horse racing; Social Licence to Operate (SLO); sport	English	Article	Article in press		Scopus	2-s2.0-85126683596
	Romero M.H.; Rodríguez-Palomares M.; Sánchez J.A.	25724672000; 57195931720; 55318348200	Animal-based measurements to assess the welfare of dairy cull cows during pre-slaughter	no slaughter context	2020	Animals	10	10	1802	1	19	18	10.3390/ani10101802	0	https://www.scopus.com/inward/record.uri?eid=2-s2.0-85092036188&doi=10.3390%2fani10101802&partnerID=40&md5=e94e662fc0109cb78f01d4be8b183636	Department of Animal Health, Faculty of Agrarian and Animal Sciences, University of Caldas, Manizales, 170004, Colombia; Department of Ethology and Wildlife, Faculty of Veterinary Medicine, National Autonomus University of Mexico (UNAM), Mexico City, 04510, Mexico	Romero M.H., Department of Animal Health, Faculty of Agrarian and Animal Sciences, University of Caldas, Manizales, 170004, Colombia; Rodríguez-Palomares M., Department of Ethology and Wildlife, Faculty of Veterinary Medicine, National Autonomus University of Mexico (UNAM), Mexico City, 04510, Mexico; Sánchez J.A., Department of Animal Health, Faculty of Agrarian and Animal Sciences, University o…	Culling is the departure of cows from the herd as a result of sale, slaughter, health, national regulations, salvage, or death. Cull cows are removed from farms with poor health, production, behavior, or other problems, and during pre-slaughter they are sometimes kept without food and water, which compromises their well-being. The objective of the present study was to evaluate the welfare state o…	Culling; Fitness for transport; Physiology; Slaughter; Well-being	English	Article	Final	All Open Access; Gold Open Access	Scopus	2-s2.0-85092036188
	Soon J.M.; Wallace C.	54974449300; 8925028100	Application of theory of planned behaviour in purchasing intention and consumption of Halal food	no slaughter context	2017	Nutrition and Food Science	47	5		635	647	12	10.1108/NFS-03-2017-0059	29	https://www.scopus.com/inward/record.uri?eid=2-s2.0-85029587935&doi=10.1108%2fNFS-03-2017-0059&partnerID=40&md5=b8f2453d26a4ca22da6627d221cc7947	University of Central Lancashire, Preston, United Kingdom	Soon J.M., University of Central Lancashire, Preston, United Kingdom; Wallace C., University of Central Lancashire, Preston, United Kingdom	Purpose: Food businesses provide Halal food to cater to the dietary requirements of Muslims, especially in communities with a growing number of the ethnic minority and at public institutions such as higher education establishments. A large and growing body of literature has investigated the purchasing and consumption behaviour of Halal food, and there are also studies that revealed consumers who …	Acceptance; Animal welfare; Attitudes; Consumers; Halal meat	English	Article	Final	All Open Access; Green Open Access	Scopus	2-s2.0-85029587935
	Schipp M.A.; Sheridan A.D.	55545612700; 56112691000	Applying the OIE terrestrial animal Health Code to the welfare of animals exported from Australia	no slaughter context	2013	OIE Revue Scientifique et Technique	32	3		669	683	14	10.20506/rst.32.2.2224	1	https://www.scopus.com/inward/record.uri?eid=2-s2.0-84898421297&doi=10.20506%2frst.32.2.2224&partnerID=40&md5=039b46a54e9abbe517ebcd34dfc39a81	Australian Government Department of Agriculture, Canberra ACT 2601, GPO Box 858, Australia	Schipp M.A., Australian Government Department of Agriculture, Canberra ACT 2601, GPO Box 858, Australia; Sheridan A.D., Australian Government Department of Agriculture, Canberra ACT 2601, GPO Box 858, Australia	Australia has implemented a through-chain regulatory framework to address animal welfare issues in the livestock export trade. The framework places the responsibility for ensuring that the welfare of exported animals meets internationally accepted standards on those who hold the licences issued for the export of Australian livestock. It applies to all livestock (cattle, buffalo, sheep, goats, cam…	Animal welfare; Australia; Export; Feeder; Livestock; OIE; Regulatory framework; Slaughter; Supply chain; Terrestrial Animal Health Code; World Organisation for Animal Health	English	Article	Final		Scopus	2-s2.0-84898421297
	Castanheira M.F.; Martínez-Páramo S.; Figueiredo F.; Cerqueira M.; Millot S.; Oliveira C.C.V.; Martins C.I.M.; Conceição L.E.C.	37006404500; 16480798200; 57189063239; 24465050800; 23025418700; 35433190500; 9533253300; 6701845714	Are coping styles consistent in the teleost fish Sparus aurata through sexual maturation and sex reversal?	no slaughter context	2016	Fish Physiology and Biochemistry	42	5		1441	1452	11	10.1007/s10695-016-0231-5	7	https://www.scopus.com/inward/record.uri?eid=2-s2.0-84965066424&doi=10.1007%2fs10695-016-0231-5&partnerID=40&md5=7d703eb405f489170dba6aea9a997110	Centro de Ciências do Mar (CCMAR), Universidade do Algarve, Campus de Gambelas, Faro, 8005-139, Portugal; Laboratoire Ressources Halieutiques, Ifremer, Place Gaby Coll, BP 7, L’Houmeau, 17137, France; SPAROS Lda, Área Empresarial de Marim, Lote C, Olhão, 8700-221, Portugal; Troms Kråkebolle AS, Ullstindveien 674, Krokelvdalen, 9019, Norway; Marine Harvest ASA, Bergen, Norway	Castanheira M.F., Centro de Ciências do Mar (CCMAR), Universidade do Algarve, Campus de Gambelas, Faro, 8005-139, Portugal; Martínez-Páramo S., Centro de Ciências do Mar (CCMAR), Universidade do Algarve, Campus de Gambelas, Faro, 8005-139, Portugal; Figueiredo F., Centro de Ciências do Mar (CCMAR), Universidade do Algarve, Campus de Gambelas, Faro, 8005-139, Portugal, Troms Kråkebolle AS, Ullstin…	Individual differences in behaviour and physiological responses to stress are associated with evolutionary adaptive variation and thus raw material for evolution. In farmed animals, the interest in consistent trait associations, i.e. coping styles, has increased dramatically over the last years. However, one of limitations of the available knowledge, regarding the temporal consistency, is that it…	Farm animals; Individual variation; Personality; Production; Sperm quality; Stress response	English	Article	Final	All Open Access; Green Open Access	Scopus	2-s2.0-84965066424
	Tiemann I.; Hillemacher S.; Wittmann M.	24449586900; 57217016644; 57219624833	Are dual-purpose chickens twice as good? Measuring performance and animal welfare throughout the fattening period	no slaughter context	2020	Animals	10	11	1980	1	15	14	10.3390/ani10111980	7	https://www.scopus.com/inward/record.uri?eid=2-s2.0-85094325837&doi=10.3390%2fani10111980&partnerID=40&md5=d754e1658e2255060f99384fa0b2b924	Institute of Animal Science, University of Bonn, Endenicher Allee 15, Bonn, 53115, Germany; Institute of Agricultural Engineering, University of Bonn, Nussallee 5, Bonn, 53115, Germany; Faculty of Agriculture, South Westphalia University of Applied Sciences, Lübecker Ring 2, Soest, 59494, Germany	Tiemann I., Institute of Animal Science, University of Bonn, Endenicher Allee 15, Bonn, 53115, Germany, Institute of Agricultural Engineering, University of Bonn, Nussallee 5, Bonn, 53115, Germany; Hillemacher S., Institute of Animal Science, University of Bonn, Endenicher Allee 15, Bonn, 53115, Germany, Institute of Agricultural Engineering, University of Bonn, Nussallee 5, Bonn, 53115, Germany;…	Chickens are the world’s most widely used farm animal and have a significant genetic diversity. In the current study, we investigated three strains for their suitability as dual-purpose chickens, with a focus on the fattening ability and welfare of the cockerels: 1. layer cockerels (Lohmann Brown, LB, n = 714); 2. cockerels of a dual-purpose hybrid (Lohmann Dual, LD, n = 844); and 3. cockerels of…	Animal welfare; Dual-purpose chicken; European production efficiency factor; Growth performance; Male layer chicks; Sampling methods; Welfare protocol	English	Article	Final	All Open Access; Gold Open Access	Scopus	2-s2.0-85094325837
	Cotter P.F.	7006716037	Are peripheral Mott cells an indication of stress or inefficient immunity?	no slaughter context	2015	Poultry Science	94	7		1433	1438	5	10.3382/ps/pev053	7	https://www.scopus.com/inward/record.uri?eid=2-s2.0-84936806764&doi=10.3382%2fps%2fpev053&partnerID=40&md5=0728dc15b1f9e322862b2f549b0e4c40	Cotter Laboratory, 39 Hathaway Cir., Arlington, 02476-7209, MA, United States	Cotter P.F., Cotter Laboratory, 39 Hathaway Cir., Arlington, 02476-7209, MA, United States	Atypical plasmacytes having distinctive cytoplasmic vacuoles (Mott cells) were detected in 77/1,000 (7.7%) of commercial hens housed conventionally, in aviaries, or in enriched environments. The earliest Mott positive peripheral blood samples were at placement (18 wk) from 2 consecutive commercial flocks. Additional samples obtained at 32, 48, 56, and 77 wk were positive. Most Mott cells came fro…	leukocytosis; Mott cell; plasmacyte; stress; welfare	English	Article	Final	All Open Access; Hybrid Gold Open Access	Scopus	2-s2.0-84936806764
	Sinclair M.; Phillips C.J.C.	57189601512; 57216214020	Asian livestock industry leaders’ perceptions of the importance of, and solutions for, animal welfare issues	no slaughter context	2019	Animals	9	6	319				10.3390/ani9060319	9	https://www.scopus.com/inward/record.uri?eid=2-s2.0-85070460949&doi=10.3390%2fani9060319&partnerID=40&md5=efd42b0615bd1067e64a902a4aa3f42e	Centre for Animal Welfare and Ethics, School of Veterinary Sciences, The University of Queensland, Queensland, 4343, Australia	Sinclair M., Centre for Animal Welfare and Ethics, School of Veterinary Sciences, The University of Queensland, Queensland, 4343, Australia; Phillips C.J.C., Centre for Animal Welfare and Ethics, School of Veterinary Sciences, The University of Queensland, Queensland, 4343, Australia	The welfare of farm animals has been the focus of increasing international interest, however, the movement has had little engagement with livestock leaders who are, arguably, the stakeholders in the position most able to make decisions that impact on animal welfare at critical times. Previous studies have drawn attention to the need to engage in constructive collaborations with the livestock indu…	Animal welfare; Attitudes; China; Cultural anthrozoology; Perceptions	English	Article	Final	All Open Access; Gold Open Access; Green Open Access	Scopus	2-s2.0-85070460949
	Mench J.A.	7004706285	Assessing animal welfare at the farm and group level: A United States perspective	no slaughter context	2003	Animal Welfare	12	4		493	503	10		55	https://www.scopus.com/inward/record.uri?eid=2-s2.0-0242523676&partnerID=40&md5=55e946292ed609b60f57ad540d8d96f1	Department of Animal Science, University of California, Davis, CA 95616, One Shields Avenue, United States	Mench J.A., Department of Animal Science, University of California, Davis, CA 95616, One Shields Avenue, United States	The United States has traditionally lagged behind Europe in the adoption of voluntary or legislated standards for the care and treatment of animals on farms. US federal legislation of farm animal practices is minimal, confined to aspects of livestock transport and slaughter. Although some of the livestock and poultry producer (commodity) groups wrote guidelines, codes of practice, or statements r…	Animal welfare; Auditing; Legislation; Retailers; Standards	English	Article	Final		Scopus	2-s2.0-0242523676
	Baker S.E.; Sharp T.M.; Macdonald D.W.	7403307771; 56808853600; 7401463172	Assessing animal welfare impacts in the management of European Rabbits (Oryctolagus cuniculus), European Moles (Talpa europaea) and Carrion Crows (Corvus corone)	no slaughter context	2016	PLoS ONE	11	1	A15				10.1371/journal.pone.0146298	31	https://www.scopus.com/inward/record.uri?eid=2-s2.0-84953775612&doi=10.1371%2fjournal.pone.0146298&partnerID=40&md5=2fdb0aba85c38dfc7d71e00fcaeb0ce6	Wildlife Conservation Research Unit, Department of Zoology, University of Oxford, Oxford, Oxfordshire, United Kingdom; Fowlers Gap Arid Zone Research Station, Centre of Ecosystem Science, University of New South Wales, Kensington, 2052, NSW, Australia	Baker S.E., Wildlife Conservation Research Unit, Department of Zoology, University of Oxford, Oxford, Oxfordshire, United Kingdom; Sharp T.M., Fowlers Gap Arid Zone Research Station, Centre of Ecosystem Science, University of New South Wales, Kensington, 2052, NSW, Australia; Macdonald D.W., Wildlife Conservation Research Unit, Department of Zoology, University of Oxford, Oxford, Oxfordshire, Uni…	Human-wildlife conflict is a global issue. Attempts tomanage this conflict impact upon wild animal welfare, an issue receiving little attention until relatively recently.Where human activities harm animal welfare these effects should beminimised where possible. However, little is known about the welfare impacts of different wildlife management interventions, and opinions on impacts vary widely.We…		English	Article	Final	All Open Access; Gold Open Access; Green Open Access	Scopus	2-s2.0-84953775612
	Simon G.E.; Hoar B.R.; Tucker C.B.	57191199954; 6602821414; 7201903089	Assessing cow–calf welfare. Part 1: Benchmarking beef cow health and behavior, handling; and management, facilities, and producer perspectives	no slaughter context	2016	Journal of Animal Science	94	8		3476	3487	11	10.2527/jas.2016-0308	29	https://www.scopus.com/inward/record.uri?eid=2-s2.0-84987900308&doi=10.2527%2fjas.2016-0308&partnerID=40&md5=006c05674bb31fa290f1365a5dd5c3a8	Department of Animal Science, University of California, Davis, 95616, United States; College of Agriculture and Natural Resources, University of Wyoming, Laramie, 82071, United States	Simon G.E., Department of Animal Science, University of California, Davis, 95616, United States; Hoar B.R., College of Agriculture and Natural Resources, University of Wyoming, Laramie, 82071, United States; Tucker C.B., Department of Animal Science, University of California, Davis, 95616, United States	Assessment programs are one way beef producers communicate information about animal welfare to retailers and the public. Programs that monitor cattle through the production cycle (e.g., the Global Animal Partnership) or at individual stages (e.g., slaughter; the North American Meat Institute) exist, but to date, there is no assessment program addressing welfare specifically in the cow–calf sector…	Beef; Cow–calf; Welfare assessment	English	Article	Final		Scopus	2-s2.0-84987900308
	Simon G.E.; Hoar B.R.; Tucker C.B.	57191199954; 6602821414; 7201903089	Assessing cow–calf welfare. Part 2: Risk factors for beef cow health and behavior and stockperson handling	no slaughter context	2016	Journal of Animal Science	94	8		3488	3500	12	10.2527/jas.2016-0309	24	https://www.scopus.com/inward/record.uri?eid=2-s2.0-85047289674&doi=10.2527%2fjas.2016-0309&partnerID=40&md5=f4015bc2e69b56da7b5656781092d2ce	Department of Animal Science, University of California, Davis, 95616, United States; College of Agriculture and Natural Resources, University of Wyoming, Laramie, 82071, United States	Simon G.E., Department of Animal Science, University of California, Davis, 95616, United States; Hoar B.R., College of Agriculture and Natural Resources, University of Wyoming, Laramie, 82071, United States; Tucker C.B., Department of Animal Science, University of California, Davis, 95616, United States	Epidemiological studies can be used to identify risk factors for livestock welfare concerns but have not been conducted in the cow–calf sector for this purpose. The objectives of this study were to investigate the relationships of 1) herd-level management, facilities, and producer perspectives with cattle health and behavior and stockperson handling and 2) stockperson handling on cattle behavior …	Beef; Risk factors; Welfare	English	Article	Final		Scopus	2-s2.0-85047289674
	Moreki J.C.; Maphanyane P.; Manyeula F.	36135732700; 57301176800; 57209258766	Assessment of awareness of broiler chicken welfare in Gaborone, Botswana	no slaughter context	2021	International Journal of Agricultural Technology	17	5		1833	1846	13		0	https://www.scopus.com/inward/record.uri?eid=2-s2.0-85117402446&partnerID=40&md5=18f06c541fd4ed09028f7b8eaba911ac	Department of Animal Sciences, Faculty of Animal and Veterinary Sciences, Botswana University of Agriculture and Natural Sciences, Private Bag 0027, Gaborone, Botswana	Moreki J.C., Department of Animal Sciences, Faculty of Animal and Veterinary Sciences, Botswana University of Agriculture and Natural Sciences, Private Bag 0027, Gaborone, Botswana; Maphanyane P., Department of Animal Sciences, Faculty of Animal and Veterinary Sciences, Botswana University of Agriculture and Natural Sciences, Private Bag 0027, Gaborone, Botswana; Manyeula F., Department of Animal…	Scientific information on broiler chicken welfare in Botswana is scarce. The awareness of poultry welfare in selected commercial broiler farms in Gaborone was assessed. A structured questionnaire was administered to 25 randomly selected farms and through direct observation. Results showed that mainly men (72%) were found actively involved in broiler chicken production. Ninety-six percent of the r…	Disinfection; Monitoring temperature; Stocking density; Stressors; Transportation	English	Article	Final		Scopus	2-s2.0-85117402446
	Honess P.E.; Marin C.; Brown A.P.; Wolfensohn S.E.	6506163722; 57190117064; 55482877600; 6602885035	Assessment of stress in non-human primates: Application of the neutrophil activation test	no slaughter context	2005	Animal Welfare	14	4		291	295	4		16	https://www.scopus.com/inward/record.uri?eid=2-s2.0-27844475133&partnerID=40&md5=d5a852f0af6d049002ecc968fec923c8	Department of Veterinary Services, University of Oxford, Oxford OX1 3PT, United Kingdom; Department of Psychology, University Complutense Madrid, Madrid, Spain; Harlan UK LTd., Bicester OX6 0TP, Blackthorn, United Kingdom	Honess P.E., Department of Veterinary Services, University of Oxford, Oxford OX1 3PT, United Kingdom; Marin C., Department of Veterinary Services, University of Oxford, Oxford OX1 3PT, United Kingdom, Department of Psychology, University Complutense Madrid, Madrid, Spain; Brown A.P., Harlan UK LTd., Bicester OX6 0TP, Blackthorn, United Kingdom; Wolfensohn S.E., Department of Veterinary Services, …	A technique measuring leukocyte (neutrophil) activity was used to examine differences between stress levels in a breeding colony of rhesus macaques housed in either a traditional caging system or open-rooms. The leukocyte activation test measured the degree to which blood from the two treatment groups could launch a further neutrophil response (superoxide production) to an in vitro challenge. Ani…	Animal welfare; Housing refinement; Leukocyte activity; Macaca mulatta; Rhesus macaques; Stress	English	Article	Final		Scopus	2-s2.0-27844475133
	Brscic M.; Gottardo F.; Tessitore E.; Guzzo L.; Ricci R.; Cozzi G.	24342690100; 8625094600; 35096880400; 35219066000; 35096455400; 35500532500	Assessment of welfare of finishing beef cattle kept on different types of floor after short-or long-term housing	no slaughter context	2015	Animal	9	6		1053	1058	5	10.1017/S1751731115000245	20	https://www.scopus.com/inward/record.uri?eid=2-s2.0-84929507415&doi=10.1017%2fS1751731115000245&partnerID=40&md5=a38cb284ab15ce240591002102cbae2d	Department of Animal Medicine Production and Health, University of Padova, Viale dell'Università 16, Legnaro, PD, 35020, Italy	Brscic M., Department of Animal Medicine Production and Health, University of Padova, Viale dell'Università 16, Legnaro, PD, 35020, Italy; Gottardo F., Department of Animal Medicine Production and Health, University of Padova, Viale dell'Università 16, Legnaro, PD, 35020, Italy; Tessitore E., Department of Animal Medicine Production and Health, University of Padova, Viale dell'Università 16, Legn…	This study aimed at evaluating short-and long-term effects of housing beef cattle on deep litter (DL) or concrete fully slatted floor (FS) on their welfare. Animal-based measures of the Welfare Quality® assessment protocol for cattle were used to assess health status and behaviour of bulls. The assessment was carried out in a large commercial farm on 15 batches of bulls (4 DL and 11 FS) 1 month a…	beef cattle; deep litter; health; slatted floor; welfare	English	Article	Final	All Open Access; Green Open Access; Hybrid Gold Open Access	Scopus	2-s2.0-84929507415
	Leon A.F.; Sanchez J.A.; Romero M.H.	57218353317; 55318348200; 25724672000	Association between attitude and empathy with the quality of human-livestock interactions	no slaughter context	2020	Animals	10	8	1304	1	17	16	10.3390/ani10081304	10	https://www.scopus.com/inward/record.uri?eid=2-s2.0-85088894110&doi=10.3390%2fani10081304&partnerID=40&md5=f722a2d26cf7dc669c70c0e7505f228c	Faculty of Agrarian and Animal Sciences, University of Caldas, Manizales, 170004, Colombia; Department of Animal Health, Faculty of Agrarian and Animal Sciences, University of Caldas, Manizales, 170004, Colombia	Leon A.F., Faculty of Agrarian and Animal Sciences, University of Caldas, Manizales, 170004, Colombia; Sanchez J.A., Department of Animal Health, Faculty of Agrarian and Animal Sciences, University of Caldas, Manizales, 170004, Colombia; Romero M.H., Department of Animal Health, Faculty of Agrarian and Animal Sciences, University of Caldas, Manizales, 170004, Colombia	The human-animal interactions are a key component of human and animal welfare. The quality of this interaction can therefore be assessed by measuring the reaction response of the animals to the handler’s behavior. The aim of this study was to investigate the association between attitude and empathy towards the animals with the quality of human-livestock interactions. Additionally, we aimed to inv…	Human-animal relationship; Livestock market; Wellbeing	English	Article	Final	All Open Access; Gold Open Access	Scopus	2-s2.0-85088894110
	Kittelsen K.E.; David B.; Moe R.O.; Poulsen H.D.; Young J.F.; Granquist E.G.	56955819700; 45560934800; 7005170335; 57190044723; 7408526258; 23110480700	Associations among gait score, production data, abattoir registrations, and postmortem tibia measurements in broiler chickens	no slaughter context	2017	Poultry Science	96	5		1033	1040	7	10.3382/ps/pew433	27	https://www.scopus.com/inward/record.uri?eid=2-s2.0-85020273866&doi=10.3382%2fps%2fpew433&partnerID=40&md5=e36573c53b209f67f8a5e6f102a29c68	Animalia, Norwegian Meat and Poultry Research Centre, Oslo, NO-0513, Norway; Norwegian Veterinary Institute, Veterinary Public Health Section, Oslo, NO-0454, Norway; Norwegian University of Life Sciences, Faculty of Veterinary Medicine and Biosciences, Oslo, NO-0033, Norway; Department of Animal Sciences, University of Aarhus, Blichers Allé 20, Tjele, DK-8830, Denmark; Department of Food Science,…	Kittelsen K.E., Animalia, Norwegian Meat and Poultry Research Centre, Oslo, NO-0513, Norway; David B., Norwegian Veterinary Institute, Veterinary Public Health Section, Oslo, NO-0454, Norway; Moe R.O., Norwegian University of Life Sciences, Faculty of Veterinary Medicine and Biosciences, Oslo, NO-0033, Norway; Poulsen H.D., Department of Animal Sciences, University of Aarhus, Blichers Allé 20, Tj…	Lameness and impaired walking ability in rapidly growing meat-type broiler chickens are major welfare issues that cause economic losses. This study analyzed the prevalence of impaired walking and its associations with production data, abattoir registrations, and postmortem tibia measurements in Norwegian broiler chickens. Gait score (GS) was used to assess walking ability in 59 different commerci…	Animal welfare; Broiler; Gait score; Lameness; Welfare indicator	English	Article	Final	All Open Access; Green Open Access; Hybrid Gold Open Access	Scopus	2-s2.0-85020273866
	Alpigiani I.; Abrahantes J.C.; Michel V.; Huneau-Salaün A.; Chemaly M.; Keeling L.J.; Gervelmeyer A.; Bacci C.; Brindani F.; Bonardi S.; Berthe F.	16041740800; 6508023834; 16245820400; 16047500900; 6507085339; 7004162322; 13104041400; 7006326109; 6603448606; 6701348172; 7003455527	Associations between animal welfare indicators and Campylobacter spp. in broiler chickens under commercial settings: A case study	no slaughter context	2017	Preventive Veterinary Medicine	147			186	193	7	10.1016/j.prevetmed.2017.09.005	20	https://www.scopus.com/inward/record.uri?eid=2-s2.0-85029844224&doi=10.1016%2fj.prevetmed.2017.09.005&partnerID=40&md5=2a2f242b065b94881b5d3c5147cfb993	Department of Veterinary Science, U.O. Food Inspection, University of Parma, Strada del Taglio 10, Parma, 43126, Italy; Anses, Ploufragan-Plouzané Laboratory, BP 53, Ploufragan, 22440, France; European Food Safety Authority, Animal Health and Welfare Unit, Via Carlo Magno, 1A, Parma, 43126, Italy; Swedish University of Agricultural Sciences, Department of Animal Environment and Health, Box 7068, …	Alpigiani I., Department of Veterinary Science, U.O. Food Inspection, University of Parma, Strada del Taglio 10, Parma, 43126, Italy; Abrahantes J.C., European Food Safety Authority, Animal Health and Welfare Unit, Via Carlo Magno, 1A, Parma, 43126, Italy; Michel V., Anses, Ploufragan-Plouzané Laboratory, BP 53, Ploufragan, 22440, France; Huneau-Salaün A., Anses, Ploufragan-Plouzané Laboratory, B…	Few studies have previously investigated how poor animal welfare might be associated with infection of zoonotic pathogens in humans. This paper assesses the predictive value of the presence of Campylobacter spp. in broiler chicken flocks when animal-based measures related to footpad dermatitis, hock burns, body lesions and arthritis are identified under commercial conditions (high density). The s…	Animal welfare; Animal-based measures; Campylobacter spp; Chicken meat; Contact dermatitis; Gross meat inspection; Public health	English	Article	Final	All Open Access; Green Open Access	Scopus	2-s2.0-85029844224
	Muri K.; Stubsjøen S.M.; Vasdal G.; Moe R.O.; Granquist E.G.	55444218200; 35106182500; 22952189400; 7005170335; 23110480700	Associations between qualitative behaviour assessments and measures of leg health, fear and mortality in Norwegian broiler chicken flocks	no slaughter context	2019	Applied Animal Behaviour Science	211			47	53	6	10.1016/j.applanim.2018.12.010	18	https://www.scopus.com/inward/record.uri?eid=2-s2.0-85058799156&doi=10.1016%2fj.applanim.2018.12.010&partnerID=40&md5=8149d092028d7fc99f819a68b93a00ed	Norwegian University of Life Sciences, Faculty of Veterinary Medicine, PO Box 8146 dep., Oslo, 0033, Norway; Norwegian Veterinary Institute, Department of Animal Health and Food Safety, P.O. Box 750, Sentrum, Oslo, N-0106, Norway; Norwegian Meat and Poultry Research Centre, Lorenveien 38, Oslo, 0513, Norway	Muri K., Norwegian University of Life Sciences, Faculty of Veterinary Medicine, PO Box 8146 dep., Oslo, 0033, Norway; Stubsjøen S.M., Norwegian Veterinary Institute, Department of Animal Health and Food Safety, P.O. Box 750, Sentrum, Oslo, N-0106, Norway; Vasdal G., Norwegian Meat and Poultry Research Centre, Lorenveien 38, Oslo, 0513, Norway; Moe R.O., Norwegian University of Life Sciences, Facu…	Qualitative behavioural assessments (QBA) is an animal-based welfare measure that has been included in several on-farm welfare assessment protocols, including the Welfare Quality® (WQ) protocol for poultry. However, there is a scarcity of information about how it relates to other animal-based welfare indicators. The aim of this study was therefore to investigate the associations between QBA and s…	Broiler chickens; Fear; Footpad dermatitis; Lameness; Mortality; Qualitative behavioural assessments (QBA)	English	Article	Final	All Open Access; Green Open Access	Scopus	2-s2.0-85058799156
	Sabuncuoglu N.; Coban O.	35616848500; 57219219646	Attitudes of Turkish veterinarians towards animal welfare	no slaughter context	2008	Animal Welfare	17	1		27	33	6		16	https://www.scopus.com/inward/record.uri?eid=2-s2.0-38949116431&partnerID=40&md5=8dcbe3f477297174a991a6bd56b214d8	Department of Animal Science, Veterinary College, Ataturk University, 25700 Ilica, Erzurum, Turkey	Sabuncuoglu N., Department of Animal Science, Veterinary College, Ataturk University, 25700 Ilica, Erzurum, Turkey; Coban O., Department of Animal Science, Veterinary College, Ataturk University, 25700 Ilica, Erzurum, Turkey	A survey was carried out to examine the attitudes of Turkish veterinarians towards animal welfare issues. The email questionnaire consisted of three sections of statements with a five-point Likert scale for choices of answer. The first section included statements examining the attitudes of Turkish veterinarians to animal welfare issues relating to European Union (EU) Legislation (93/119/EC, 95/29…	Animal welfare; Attitude; European Union; Legislation; Survey; Turkish veterinarians	English	Article	Final		Scopus	2-s2.0-38949116431
	Ward S.J.; Liste G.; Tinarwo A.	55434150200; 11539938500; 23026439500	Attitudes of UK sheep farmers towards fostering methods: A national survey	no slaughter context	2011	Small Ruminant Research	99	2023-03-02		87	92	5	10.1016/j.smallrumres.2011.04.004	3	https://www.scopus.com/inward/record.uri?eid=2-s2.0-79961211010&doi=10.1016%2fj.smallrumres.2011.04.004&partnerID=40&md5=dba59d324a93c128090f5cd1a3f63ca9	Animal Welfare and Management, Moulton College, Moulton, Northampton NN3 7RR, West Street, United Kingdom; Department of Veterinary Medicine, Cambridge University, Cambridge CB3 0ES, Madingley Road, United Kingdom	Ward S.J., Animal Welfare and Management, Moulton College, Moulton, Northampton NN3 7RR, West Street, United Kingdom; Liste G., Department of Veterinary Medicine, Cambridge University, Cambridge CB3 0ES, Madingley Road, United Kingdom; Tinarwo A., Animal Welfare and Management, Moulton College, Moulton, Northampton NN3 7RR, West Street, United Kingdom	Fostering is a process used by sheep farmers for the rearing of abandoned lambs or in the incidence of triplets, providing the surplus lamb a surrogate ewe. Historically, research has assessed the varying success rates of different fostering methods and evaluated them using the latency to accept the alien lamb. There are no current studies on the frequency of use of the different methods, nor the…	Behaviour; Farmer attitudes; Fostering; Lamb; Sheep; Welfare	English	Article	Final		Scopus	2-s2.0-79961211010
	Vanderhasselt R.F.; Sprenger M.; Duchateau L.; Tuyttens F.A.M.	55535895500; 35263107100; 7004057403; 6701341176	Automated assessment of footpad dermatitis in broiler chickens at the slaughter-line: Evaluation and correspondence with human expert scores	no slaughter context	2013	Poultry Science	92	1		12	18	6	10.3382/ps.2012-02153	19	https://www.scopus.com/inward/record.uri?eid=2-s2.0-84871517135&doi=10.3382%2fps.2012-02153&partnerID=40&md5=0b3f99b3dfc1afaab7c9f8c405b613a6	Animal Sciences Unit, Institute for Agricultural and Fisheries Research (ILVO), B-9090 Melle, Scheldeweg 68, Belgium; Faculty of Veterinary Medicine, Ghent University, B-9820 Merelbeke, Salisburylaan 133, Belgium	Vanderhasselt R.F., Animal Sciences Unit, Institute for Agricultural and Fisheries Research (ILVO), B-9090 Melle, Scheldeweg 68, Belgium; Sprenger M., Animal Sciences Unit, Institute for Agricultural and Fisheries Research (ILVO), B-9090 Melle, Scheldeweg 68, Belgium; Duchateau L., Faculty of Veterinary Medicine, Ghent University, B-9820 Merelbeke, Salisburylaan 133, Belgium; Tuyttens F.A.M., Fac…	Footpad dermatitis is increasingly used as an indicator of decreased broiler welfare, and automa-tion of dermatitis monitoring potentially reduces the ef-fort needed to monitor commercial flocks. In this study we evaluated a prototype system for the automatic as-sessment of footpad dermatitis in broiler chickens by comparing the automatic assessment with a human ex-pert assessment. The expert aim…	Animal welfare; Automation; Broiler; Dermatitis	English	Article	Final	All Open Access; Hybrid Gold Open Access	Scopus	2-s2.0-84871517135
	Schön P.C.; Puppe B.; Manteuffel G.	6603841667; 57206530235; 7003431441	Automated recording of stress vocalisations as a tool to document impaired welfare in pigs	no slaughter context	2004	Animal Welfare	13	2		105	110	5		71	https://www.scopus.com/inward/record.uri?eid=2-s2.0-2342527871&partnerID=40&md5=75d16a96048b8ca55bd365011c3787c9	Res. Inst. for Biol. of Farm Animals, Behavioural Physiology Unit, D-18196 Dummerstorf, Wilhelm-Stahl-Allee 2, Germany	Schön P.C., Res. Inst. for Biol. of Farm Animals, Behavioural Physiology Unit, D-18196 Dummerstorf, Wilhelm-Stahl-Allee 2, Germany; Puppe B., Res. Inst. for Biol. of Farm Animals, Behavioural Physiology Unit, D-18196 Dummerstorf, Wilhelm-Stahl-Allee 2, Germany; Manteuffel G., Res. Inst. for Biol. of Farm Animals, Behavioural Physiology Unit, D-18196 Dummerstorf, Wilhelm-Stahl-Allee 2, Germany	The vocalisations of animals are results of particular emotional states. For example, the stress screams of pigs may be indicators of disturbed welfare. Our objective was to develop a system to monitor and record levels of stress calls in pigs, which could be employed in environments of breeding, transportation and slaughter. Using a combination of sound analysis by linear prediction coding and a…	Animal welfare; Neural networks; Pig; Stress; Vocalisation; Welfare assessment	English	Article	Final		Scopus	2-s2.0-2342527871
	Jung L.; Nasirahmadi A.; Schulte-Landwehr J.; Knierim U.	57196058180; 55842933900; 57221520389; 55959591600	Automatic assessment of keel bone damage in laying hens at the slaughter line	no slaughter context	2021	Animals	11	1	163	1	10	9	10.3390/ani11010163	2	https://www.scopus.com/inward/record.uri?eid=2-s2.0-85099348614&doi=10.3390%2fani11010163&partnerID=40&md5=c02f5dcee0834b6d7368e8157e1a5f17	Farm Animal Behaviour and Husbandry Section, University of Kassel, Nordbahnhofstr. 1a, Witzenhausen, 37213, Germany; Agricultural and Biosystems Engineering Section, University of Kassel, Nordbahnhofstr. 1a, Witzenhausen, 37213, Germany; CLK GmbH, Zur Steinkuhle 3, Altenberge, 48341, Germany	Jung L., Farm Animal Behaviour and Husbandry Section, University of Kassel, Nordbahnhofstr. 1a, Witzenhausen, 37213, Germany; Nasirahmadi A., Agricultural and Biosystems Engineering Section, University of Kassel, Nordbahnhofstr. 1a, Witzenhausen, 37213, Germany; Schulte-Landwehr J., CLK GmbH, Zur Steinkuhle 3, Altenberge, 48341, Germany; Knierim U., Farm Animal Behaviour and Husbandry Section, Un…	Keel bone damage (KBD) can be found in all commercial laying hen flocks with a wide range of 23% to 69% of hens/flock found to be affected in this study. As KBD may be linked with chronic pain and a decrease in mobility, it is a serious welfare problem. An automatic assessment system at the slaughter line could support the detection of KBD and would have the advantage of being standardized and fa…	Animal welfare assessment; Automated assessment; Health indicators; Keel bone damage; Laying hen; Laying hen health; Precision livestock farming	English	Article	Final	All Open Access; Gold Open Access; Green Open Access	Scopus	2-s2.0-85099348614
	Aydin A.; Bahr C.; Berckmans D.	18036693600; 26423556900; 56089143100	Automatic classification of measures of lying to assess the lameness of broilers	no slaughter context	2015	Animal Welfare	24	3		335	343	8	10.7120/09627286.24.3.335	9	https://www.scopus.com/inward/record.uri?eid=2-s2.0-84940367457&doi=10.7120%2f09627286.24.3.335&partnerID=40&md5=1904f7eb17642ea5550642f1f53046b5	Department of Agricultural Machinery and Technologies Engineering, Faculty of Agriculture, Canakkale Onsekiz Mart University, Canakkale, 17020, Turkey; Division Measure, Model and Manage Bioresponses, Katholieke Universiteit Leuven, Kasteelpark Arenberg 30, Heverlee, B-3001, Belgium	Aydin A., Department of Agricultural Machinery and Technologies Engineering, Faculty of Agriculture, Canakkale Onsekiz Mart University, Canakkale, 17020, Turkey; Bahr C., Division Measure, Model and Manage Bioresponses, Katholieke Universiteit Leuven, Kasteelpark Arenberg 30, Heverlee, B-3001, Belgium; Berckmans D., Division Measure, Model and Manage Bioresponses, Katholieke Universiteit Leuven, …	Leg disorders are a major cause of poor welfare in broilers. Previous studies have shown that at slaughter age at least 90% of chickens experienced some degree of gait problems and approximately 30% were seriously lame. In this study, a new and non-invasive technique was developed to automatically assess the lameness of the birds. For this purpose, video surveillance images of broilers with five …	Animal welfare; Automatic monitoring; Broiler chickens; Gait score; Lameness; Latency to lie	English	Article	Final		Scopus	2-s2.0-84940367457
	Döring D.; Haberland B.E.; Ossig A.; Küchenhoff H.; Dobenecker B.; Hack R.; Schmidt J.; Erhard M.H.	8287661900; 56406362700; 17135522100; 55942465700; 6602193560; 16166136200; 16146739400; 7006079567	Behavior of laboratory beagles towards humans: Assessment in an encounter test and a simulation of experimental situations	no slaughter context	2014	Journal of Veterinary Behavior: Clinical Applications and Research	9	6		295	303	8	10.1016/j.jveb.2014.08.007	8	https://www.scopus.com/inward/record.uri?eid=2-s2.0-84955169642&doi=10.1016%2fj.jveb.2014.08.007&partnerID=40&md5=c443f03115be8bbfd555ca3af761b9e7	Chair of Animal Welfare, Ethology, Animal Hygiene and Husbandry, Department of Veterinary Sciences, Ludwig-Maximilians University, Munich, Germany; Statistical Consulting Unit (STABLAB), Ludwig-Maximilians University, Munich, Germany; Institute of Animal Nutrition and Dietetics, Department of Veterinary Sciences, Ludwig-Maximilians University, Oberschleiβheim, Germany; Sanofi-Aventis Deutschland …	Döring D., Chair of Animal Welfare, Ethology, Animal Hygiene and Husbandry, Department of Veterinary Sciences, Ludwig-Maximilians University, Munich, Germany; Haberland B.E., Chair of Animal Welfare, Ethology, Animal Hygiene and Husbandry, Department of Veterinary Sciences, Ludwig-Maximilians University, Munich, Germany; Ossig A., Statistical Consulting Unit (STABLAB), Ludwig-Maximilians Universi…	Because of the close emotional bonds between the man and the domesticated dog, husbandry of laboratory dogs is regarded with particular interest by the public. The relationship between laboratory dogs and the man is particularly important for animal welfare, and daily contact with caregivers and handlers should not elicit fear in dogs. The aim of this study was to investigate the behaviors of lab…	Behavior; distress; human bond; laboratory dog; manipulation	English	Article	Final		Scopus	2-s2.0-84955169642
	Hötzel M.J.; Lopes E.C.J.; de Oliveira P.A.V.; Guidoni A.L.	35563241700; 26028010700; 56258810000; 7003353668	Behaviour and performance of pigs finished on deep bedding with wood shavings or rice husks in summer	no slaughter context	2009	Animal Welfare	18	1		65	71	6		20	https://www.scopus.com/inward/record.uri?eid=2-s2.0-59849097187&partnerID=40&md5=0f6606e74423ff55c2678eb89654c17e	Laboratório de Etologia Aplicada, Departamento de Zootecnia e Desenvolvimento Rural, Universidade Federal de Santa Catarina, Florianópolis, SC 88034-001, Rodovia Admar Gonzaga 1346, Brazil; Embrapa Suínos e Aves, 88700-000 Concórdia, SC, BR 153, km 110, Brazil	Hötzel M.J., Laboratório de Etologia Aplicada, Departamento de Zootecnia e Desenvolvimento Rural, Universidade Federal de Santa Catarina, Florianópolis, SC 88034-001, Rodovia Admar Gonzaga 1346, Brazil; Lopes E.C.J., Laboratório de Etologia Aplicada, Departamento de Zootecnia e Desenvolvimento Rural, Universidade Federal de Santa Catarina, Florianópolis, SC 88034-001, Rodovia Admar Gonzaga 1346, …	Concern that excessive temperatures arising from substrate fermentation could have a deleterious effect on voluntary feed intake and weight gain, especially during the hottest times of the year, might be a barrier to the widespread adoption of deep-bedding systems for pig production in Brazil. The aim of this study was to compare the behaviour and performance of pigs reared on deep bedding with t…	Animal welfare; Enrichment; Housing; Performance; Redirected behaviours; Rooting material	English	Article	Final		Scopus	2-s2.0-59849097187
	Trocino A.; Filiou E.; Zomeño C.; Birolo M.; Bertotto D.; Xiccato G.	6603169591; 55670461000; 36516012500; 55846344200; 6507648526; 6602566895	Behaviour and reactivity of female and male rabbits housed in collective pens: Effects of floor type and stocking density at different ages	no slaughter context	2018	World Rabbit Science	26	2		135	147	12	10.4995/wrs.2018.7747	8	https://www.scopus.com/inward/record.uri?eid=2-s2.0-85049723923&doi=10.4995%2fwrs.2018.7747&partnerID=40&md5=0f741c6015a7692e8fd67957d4536373	Department of Comparative Biomedicine and Food Science (BCA), University of Padova, Viale dell’Università 16, Legnaro, Padova, I-35020, Italy; Department of Agronomy Food Natural Resources Animal and Environment (DAFNAE), University of Padova, Viale dell’Università 16, Legnaro, Padova, I-35020, Italy	Trocino A., Department of Comparative Biomedicine and Food Science (BCA), University of Padova, Viale dell’Università 16, Legnaro, Padova, I-35020, Italy; Filiou E., Department of Agronomy Food Natural Resources Animal and Environment (DAFNAE), University of Padova, Viale dell’Università 16, Legnaro, Padova, I-35020, Italy; Zomeño C., Department of Comparative Biomedicine and Food Science (BCA), …	At 33 d of age, 376 crossbred rabbits of both genders were housed in sex-mixed groups in 16 open-top collective pens (1.68 m2) in a factorial arrangement, with 2 types of flooring (wooden slats vs. plastic grid, W vs. P) and 2 stocking densities (12 vs. 16 animals/m2). Behavioural recordings (time budget), reactivity towards unknown humans (tonic immobility and human approach tests) and environme…	Age; Collective housing; Fear; Gender; Stress; Time budget	English	Article	Final	All Open Access; Gold Open Access; Green Open Access	Scopus	2-s2.0-85049723923
	Göransson L.; Gunnarsson S.; Wallenbeck A.; Yngvesson J.	57216463799; 7004247570; 14623468700; 6507482796	Behaviour in slower-growing broilers and free-range access on organic farms in sweden	no slaughter context	2021	Animals	11	10	2967				10.3390/ani11102967	1	https://www.scopus.com/inward/record.uri?eid=2-s2.0-85117128700&doi=10.3390%2fani11102967&partnerID=40&md5=7237aebd78670b51a616e26c001f5f6a	Department of Animal Environment and Health, Swedish University of Agricultural Sciences (SLU), P.O. Box 234, Skara, S-53223, Sweden	Göransson L., Department of Animal Environment and Health, Swedish University of Agricultural Sciences (SLU), P.O. Box 234, Skara, S-53223, Sweden; Gunnarsson S., Department of Animal Environment and Health, Swedish University of Agricultural Sciences (SLU), P.O. Box 234, Skara, S-53223, Sweden; Wallenbeck A., Department of Animal Environment and Health, Swedish University of Agricultural Science…	Two slower-growing hybrids (Rowan Ranger and Hubbard) are currently reared in organic broiler production in Sweden, but knowledge of bird welfare on commercial farms is limited. This study examined chicken behaviour, including free-range use and features of this, in order to enhance knowledge, describe the current situation and identify practical solutions on Swedish organic broiler farms. Eight …	Avoidance distance test; Chicken; Environmental enrichment; Predation; Slow-growing; Welfare	English	Article	Final	All Open Access; Gold Open Access; Green Open Access	Scopus	2-s2.0-85117128700
	Webster J.R.; Matthews L.R.	24485785100; 7202490634	Behaviour of red deer following antler removal with two methods of analgesia	no slaughter context	2006	Livestock Science	100	2023-03-02		150	158	8	10.1016/j.livprodsci.2005.08.011	6	https://www.scopus.com/inward/record.uri?eid=2-s2.0-33646484487&doi=10.1016%2fj.livprodsci.2005.08.011&partnerID=40&md5=8b1a4b201f7122a7b56c2145ff8bf483	Animal Behaviour and Welfare Research Centre, AgResearch, Ruakura, Hamilton, Private Bag 3123, New Zealand	Webster J.R., Animal Behaviour and Welfare Research Centre, AgResearch, Ruakura, Hamilton, Private Bag 3123, New Zealand; Matthews L.R., Animal Behaviour and Welfare Research Centre, AgResearch, Ruakura, Hamilton, Private Bag 3123, New Zealand	This study examined the effect of two different methods of analgesia on behavioural responses to velvet antler removal in red deer. Specifically, behaviour during the first 7 h after antler removal using compression (C, latex band around the pedicle) or lignocaine (L, 2% lignocaine hydrochloride) analgesia was compared with controls (R, restraint only). The frequencies of ear flicking, tongue fli…	Analgesia; Antler removal; Behaviour; Red deer	English	Article	Final		Scopus	2-s2.0-33646484487
	Miranda-de la Lama G.C.; Villarroel M.; María G.A.	57226721051; 7003443916; 7006219583	Behavioural and physiological profiles following exposure to novel environment and social mixing in lambs	no slaughter context	2012	Small Ruminant Research	103	2023-03-02		158	163	5	10.1016/j.smallrumres.2011.08.007	51	https://www.scopus.com/inward/record.uri?eid=2-s2.0-81755162163&doi=10.1016%2fj.smallrumres.2011.08.007&partnerID=40&md5=3fce7d5fe599c056d3737589caa4b9d0	Department of Animal Production and Food Science, Faculty of Veterinary Medicine, University of Zaragoza, 50013 Zaragoza, Miguel Servet 177, Spain; Department of Animal Science, E.T.S.I.A. Polytechnic University of Madrid, Madrid, Spain	Miranda-de la Lama G.C., Department of Animal Production and Food Science, Faculty of Veterinary Medicine, University of Zaragoza, 50013 Zaragoza, Miguel Servet 177, Spain; Villarroel M., Department of Animal Science, E.T.S.I.A. Polytechnic University of Madrid, Madrid, Spain; María G.A., Department of Animal Production and Food Science, Faculty of Veterinary Medicine, University of Zaragoza, 500…	Most livestock production systems, animals are classified by sex, age or weight at different times in their productive life. In recent years, the pre-slaughter logistics for lamb production has been modified to include an intermediate step between the farm and the abattoir at classification centres (CC), where animals are classified by weight upon arrival and finished to the appropriate slaughter…	Affiliation; Aggression; Lamb welfare; Logistic chain; Novel environment; Social mixing; Stereotypes	English	Article	Final		Scopus	2-s2.0-81755162163
	Ibáñez M.; De la Fuente J.; Thos J.; González de Chavarri E.	6504833608; 8597684300; 7801491774; 6506551772	Behavioural and physiological responses of suckling lambs to transport and lairage	no slaughter context	2002	Animal Welfare	11	2		223	230	7		17	https://www.scopus.com/inward/record.uri?eid=2-s2.0-0036228247&partnerID=40&md5=f7a09de5beab0862fc25a328b766c326	Departamento de Produccion Animal, Facultad de Veterinaria, Universidad Complutense de Madrid, 28040 Madrid, Spain	Ibáñez M., Departamento de Produccion Animal, Facultad de Veterinaria, Universidad Complutense de Madrid, 28040 Madrid, Spain; De la Fuente J., Departamento de Produccion Animal, Facultad de Veterinaria, Universidad Complutense de Madrid, 28040 Madrid, Spain; Thos J., Departamento de Produccion Animal, Facultad de Veterinaria, Universidad Complutense de Madrid, 28040 Madrid, Spain; González de Ch…	The effects on suckling lambs of two stocking densities during transport (high stocking density: eight lambs per m2; low stocking density: four lambs per m2) and two periods of lairage before slaughter (1.5 h and 3 h) were studied. The behaviour of lambs transported for short-duration journeys at the two stocking densities was recorded. At slaughter, blood samples were obtained after a lairage pe…	Animal welfare; Lairage; Stocking density; Suckling lambs	English	Article	Final		Scopus	2-s2.0-0036228247
	Boissyt A.; Veissier I.; Roussel S.	6506050555; 7003853930; 7003503046	Behavioural reactivity affected by chronic stress: An experimental approach in calves submitted to environmental instability	no slaughter context	2001	Animal Welfare	10	SUPPL.		S175	S185	10		36	https://www.scopus.com/inward/record.uri?eid=2-s2.0-0000197055&partnerID=40&md5=de56812ca3c399ff1a6ab718e79d55a0	U. de Rech. sur les Herbivores, Inst. Natl. de la Rech. Agronomique, 63 122 Saint-Genes-Champanelle, France; Inst. Natl. l'Agronom. - Paris G., 75 231 Paris, France	Boissyt A., U. de Rech. sur les Herbivores, Inst. Natl. de la Rech. Agronomique, 63 122 Saint-Genes-Champanelle, France; Veissier I., U. de Rech. sur les Herbivores, Inst. Natl. de la Rech. Agronomique, 63 122 Saint-Genes-Champanelle, France; Roussel S., U. de Rech. sur les Herbivores, Inst. Natl. de la Rech. Agronomique, 63 122 Saint-Genes-Champanelle, France, Inst. Natl. l'Agronom. - Paris G., …	Whereas physiological and behavioural responses to acute stressors are well documented, chronic stress remains difficult to assess in farm animals. The aim of the present paper is to investigate whether calves' behavioural reactions to acute events are modified during chronic intermittent stress. Thirty-two calves housed in pairs were used. For half of the calves the partner and the pen were chan…	Animal welfare; Cattle; Novelty; Predator; Reactivity; Social instability	English	Article	Final		Scopus	2-s2.0-0000197055
	Taylor A.A.; Weary D.M.; Lessard M.; Braithwaite L.	55473528200; 7006682969; 7006169834; 57213083172	Behavioural responses of piglets to castration: The effect of piglet age	no slaughter context	2001	Applied Animal Behaviour Science	73	1		35	43	8	10.1016/S0168-1591(01)00123-X	104	https://www.scopus.com/inward/record.uri?eid=2-s2.0-0035797126&doi=10.1016%2fS0168-1591%2801%2900123-X&partnerID=40&md5=581b2e9c364da605d723a4e9c6290538	Centre for Food Animal Research, Agriculture and Agri-Food Canada, Central Experimental Farm, Ottawa, Canada; Faculty of Agricultural Sciences, University of British Columbia, 2357 Main Mall, Vancouver, BC V6T 1Z4, Canada	Taylor A.A., Centre for Food Animal Research, Agriculture and Agri-Food Canada, Central Experimental Farm, Ottawa, Canada; Weary D.M., Centre for Food Animal Research, Agriculture and Agri-Food Canada, Central Experimental Farm, Ottawa, Canada; Lessard M., Centre for Food Animal Research, Agriculture and Agri-Food Canada, Central Experimental Farm, Ottawa, Canada; Braithwaite L., Faculty of Agric…	It has long been assumed that neonatal animals are less sensitive than older animals to pain, and this reasoning has been used to recommend that routine surgical procedures be performed at an early age. In this study we tested if vocal and other behavioural responses to castration increase with piglet age. Piglets (n = 84) from 14 litters were assigned to one of six treatment groups: castration o…	Castration; Pigs-pain; Vocalisation; Welfare	English	Article	Final		Scopus	2-s2.0-0035797126
	Martin J.E.; Christensen K.; Vizzier-Thaxton Y.; Mitchell M.A.; McKeegan D.E.F.	57189056774; 7202687684; 55664189800; 7402872256; 6602145415	Behavioural, brain and cardiac responses to hypobaric hypoxia in broiler chickens	no slaughter context	2016	Physiology and Behavior	163			25	36	11	10.1016/j.physbeh.2016.04.038	23	https://www.scopus.com/inward/record.uri?eid=2-s2.0-84964963424&doi=10.1016%2fj.physbeh.2016.04.038&partnerID=40&md5=cff344bcaf4e6793d9747fd1943ca1a5	The Royal (Dick) School of Veterinary Studies and The Roslin Institute, Easter Bush Campus, Edinburgh, Midlothian, EH25 9RG, United Kingdom; Institute of Biodiversity, Animal Health and Comparative Medicine, College of Medical, Veterinary and Life Sciences, University of Glasgow, G61 1QH, United Kingdom; Centre of Excellence for Poultry Science, University of Arkansas, Fayetteville, 72701, AR, Un…	Martin J.E., The Royal (Dick) School of Veterinary Studies and The Roslin Institute, Easter Bush Campus, Edinburgh, Midlothian, EH25 9RG, United Kingdom, Institute of Biodiversity, Animal Health and Comparative Medicine, College of Medical, Veterinary and Life Sciences, University of Glasgow, G61 1QH, United Kingdom, Animal Behaviour and Welfare, Animal and Veterinary Science Research Group, SRUC…	A novel approach to pre-slaughter stunning of chickens has been developed in which birds are rendered unconscious by progressive hypobaric hypoxia. Termed Low Atmospheric Pressure Stunning (LAPS), this approach involves application of gradual decompression lasting 280 s according to a prescribed curve. We examined responses to LAPS by recording behaviour, electroencephalogram (EEG) and electrocar…	Animal welfare; Behaviour; Electrocardiogram; Electroencephalogram; Hypobaric hypoxia; Low atmosphere pressure stunning	English	Article	Final	All Open Access; Green Open Access	Scopus	2-s2.0-84964963424
	Vitali M.; Luppi A.; Bonilauri P.; Spinelli E.; Santacroce E.; Trevisi P.	56416054300; 56492657400; 23993671300; 57210437657; 57223886364; 12807769700	Benchmarking of anatomopathological lesions assessed at slaughter and their association with tail lesions and carcass traits in heavy pigs	no slaughter context	2021	Italian Journal of Animal Science	20	1		1103	1113	10	10.1080/1828051X.2021.1944339	3	https://www.scopus.com/inward/record.uri?eid=2-s2.0-85107209613&doi=10.1080%2f1828051X.2021.1944339&partnerID=40&md5=d4c251f501b9659a2f954b6ecace3c59	Dipartimento di Scienze e Tecnologie Agro-Alimentari– DISTAL, Università di Bologna, Bologna, Italy; Istituto Zooprofilattico Sperimentale della Lombardia e dell’Emilia Romagna –IZLER, Brescia, Italy	Vitali M., Dipartimento di Scienze e Tecnologie Agro-Alimentari– DISTAL, Università di Bologna, Bologna, Italy; Luppi A., Istituto Zooprofilattico Sperimentale della Lombardia e dell’Emilia Romagna –IZLER, Brescia, Italy; Bonilauri P., Istituto Zooprofilattico Sperimentale della Lombardia e dell’Emilia Romagna –IZLER, Brescia, Italy; Spinelli E., Dipartimento di Scienze e Tecnologie Agro-Alimenta…	Recording lesions at the abattoir provides information for benchmarking pig health and welfare conditions. The study involved 79 batches of Italian heavy pigs, mainly tail-docked. The aim of the study was to identify the prevalence of anatomopathological lesions and to identify relationships with carcass traits. The scoring of enzootic pneumonia-like lesions (EP), chronic pleuritis (CP), dorso-ca…	animal health and welfare; carcass traits; pleuritis and pericarditis; Pulmonary lesions; tail lesion	English	Article	Final	All Open Access; Gold Open Access; Green Open Access	Scopus	2-s2.0-85107209613
	González L.A.; Schwartzkopf-Genswein K.S.; Bryan M.; Silasi R.; Brown F.	57191417911; 6602136874; 53981082500; 6503894606; 55432008300	Benchmarking study of industry practices during commercial long haul transport of cattle in Alberta, Canada	no slaughter context	2012	Journal of Animal Science	90	10		3606	3617	11	10.2527/jas.2011-4770	31	https://www.scopus.com/inward/record.uri?eid=2-s2.0-84882690490&doi=10.2527%2fjas.2011-4770&partnerID=40&md5=1383cd3fee8c041d00c40e9dd826ba8e	Agriculture and Agri-Food Canada, Lethbridge Research Centre, Lethbridge, T1J 4B1 AB, Canada; University of Manitoba, Department of Animal Science, Winnipeg, R3T 2N2 MB, Canada; CSIRO Livestock Industries, Australian Tropical Sciences and Innovation Precinct, Townsville, 4810 QLD, Australia	González L.A., Agriculture and Agri-Food Canada, Lethbridge Research Centre, Lethbridge, T1J 4B1 AB, Canada, University of Manitoba, Department of Animal Science, Winnipeg, R3T 2N2 MB, Canada, CSIRO Livestock Industries, Australian Tropical Sciences and Innovation Precinct, Townsville, 4810 QLD, Australia; Schwartzkopf-Genswein K.S., Agriculture and Agri-Food Canada, Lethbridge Research Centre, L…	The objective of the present study was to document current commercial practices during long haul transport (≥400 km) of cattle in Alberta through surveys delivered to truck drivers (6,152 journeys that transport-ed 290,362 animals). The live beef export industry to the United States (89% of all journeys) had a large influence on long haul transport. This was particularly true for fat cattle going…	Livestock; Long distance; Road transport; Survey	English	Article	Final		Scopus	2-s2.0-84882690490
	Henderson L.J.; Dani B.; Serrano E.M.N.; Smulders T.V.; Roughan J.V.	36025136800; 57218770992; 57218769231; 6602802479; 7004432427	Benefits of tunnel handling persist after repeated restraint, injection and anaesthesia	no slaughter context	2020	Scientific Reports	10	1	14562				10.1038/s41598-020-71476-y	11	https://www.scopus.com/inward/record.uri?eid=2-s2.0-85090246415&doi=10.1038%2fs41598-020-71476-y&partnerID=40&md5=a29493506c7e961dc24e4091465557ae	Centre for Behaviour and Evolution, Newcastle University, Newcastle Upon Tyne, NE2 4HH, United Kingdom; Institute of Neuroscience, Newcastle University, Newcastle upon Tyne, NE2 4HH, United Kingdom; The Roslin Institute, The University of Edinburgh, Midlothian, EH25 9RG, United Kingdom	Henderson L.J., Centre for Behaviour and Evolution, Newcastle University, Newcastle Upon Tyne, NE2 4HH, United Kingdom, Institute of Neuroscience, Newcastle University, Newcastle upon Tyne, NE2 4HH, United Kingdom, The Roslin Institute, The University of Edinburgh, Midlothian, EH25 9RG, United Kingdom; Dani B., Institute of Neuroscience, Newcastle University, Newcastle upon Tyne, NE2 4HH, United …	Millions of mice are used every year for scientific research, representing the majority of scientific procedures conducted on animals. The standard method used to pick up laboratory mice for general husbandry and experimental procedures is known as tail handling and involves the capture, elevation and restraint of mice via their tails. There is growing evidence that, compared to non-aversive hand…		English	Article	Final	All Open Access; Gold Open Access; Green Open Access	Scopus	2-s2.0-85090246415
	White H.B.; Batcheller G.R.; Boggess E.K.; Brown C.L.; Butfiloski J.W.; Decker T.A.; Erb J.D.; Fall M.W.; Hamilton D.A.; Hiller T.L.; Hubert G.F., Jr.; Lovallo M.J.; Olson J.F.; Roberts N.M.	56567292700; 6506126076; 57220779179; 57220779016; 36981187900; 57197189967; 55950256700; 7102287290; 57197222640; 8667182600; 7004972414; 6604059792; 57200694415; 16204106400	Best Management Practices for Trapping Furbearers in the United States; [Mejores prácticas de manejo para atrapar animales de peletería en los Estados Unidos]; [Meilleures pratiques de gestion pour le piégeage des animaux à fourrure aux États-Unis]	no slaughter context	2021	Wildlife Monographs	207	1		3	59	56	10.1002/wmon.1057	9	https://www.scopus.com/inward/record.uri?eid=2-s2.0-85097603374&doi=10.1002%2fwmon.1057&partnerID=40&md5=027091b814e4d18ccc3bf979c4c8e856	Association of Fish and Wildlife Agencies, c/o Arizona Game and Fish Department, 5000 W. Carefree Hwy, Phoenix, 85086, AZ, United States; New York State Department of Environmental Conservation, Division of Fish, Wildlife and Marine Resources, 625 Broadway, Albany, 12233, NY, United States; Minnesota Department of Natural Resources, Division of Fish and Wildlife, 500 Lafayette Road, St. Paul, 551…	White H.B., Association of Fish and Wildlife Agencies, c/o Arizona Game and Fish Department, 5000 W. Carefree Hwy, Phoenix, 85086, AZ, United States; Batcheller G.R., New York State Department of Environmental Conservation, Division of Fish, Wildlife and Marine Resources, 625 Broadway, Albany, 12233, NY, United States; Boggess E.K., Minnesota Department of Natural Resources, Division of Fish and …	Humans have used wild furbearers for various purposes for thousands of years. Today, furbearers are sustainably used by the public for their pelts, leather, bones, glands, meat, or other purposes. In North America, contemporary harvest of furbearers has evolved along with trap technologies and societal concerns, and is now highly regulated and more closely coupled with harvest analysis and popula…	animal welfare; best management practices; BMPs; cage trap; capture efficiency; conservation; foot-encapsulating trap; foothold trap; footsnare; furbearer management; furbearers; injury score; restraining device; trap selectivity; trapping	English	Article	Final	All Open Access; Green Open Access; Hybrid Gold Open Access	Scopus	2-s2.0-85097603374
	Palmer C.; Pedersen H.G.; Sandøe P.	8140049100; 7202267467; 35570037700	Beyond Castration and Culling: Should We Use Non-surgical, Pharmacological Methods to Control the Sexual Behavior and Reproduction of Animals?	no slaughter context	2018	Journal of Agricultural and Environmental Ethics	31	2		197	218	21	10.1007/s10806-018-9718-7	11	https://www.scopus.com/inward/record.uri?eid=2-s2.0-85041539448&doi=10.1007%2fs10806-018-9718-7&partnerID=40&md5=dbb7b114ad58be1e87c75470eea2cff8	Department of Philosophy, Texas A&M University, 4237 TAMU, College Station, 77843-4237, TX, United States; Department of Veterinary Clinical Sciences, University of Copenhagen, Dyrlægevej 68, Frederiksberg C, 1870, Denmark; Department of Veterinary and Animal Sciences, University of Copenhagen, Grønnegårdsvej 8, Frederiksberg C, 1870, Denmark; Department of Food and Resource Economics, University…	Palmer C., Department of Philosophy, Texas A&M University, 4237 TAMU, College Station, 77843-4237, TX, United States; Pedersen H.G., Department of Veterinary Clinical Sciences, University of Copenhagen, Dyrlægevej 68, Frederiksberg C, 1870, Denmark; Sandøe P., Department of Veterinary and Animal Sciences, University of Copenhagen, Grønnegårdsvej 8, Frederiksberg C, 1870, Denmark, Department of Fo…	This paper explores ethical issues raised by the application of non-surgical, pharmaceutical fertility control to manage reproductive behaviors in domesticated and wild animal species. We focus on methods that interfere with the effects of GnRH, making animals infertile and significantly suppressing sexual behavior in both sexes. The paper is anchored by considering ethical issues raised by four …	Animal contraception; Animal ethics; Animal fertility control; Animal rights; Animal welfare; Spaying and neutering	English	Article	Final	All Open Access; Green Open Access	Scopus	2-s2.0-85041539448
	Rettenbacher S.; Palme R.	8709016200; 55119967900	Biological validation of a non-invasive method for stress assessment in chickens	no slaughter context	2009	Berliner und Munchener Tierarztliche Wochenschrift	122	2023-02-01		8	12	4	10.2376/0005-9366-122-8	13	https://www.scopus.com/inward/record.uri?eid=2-s2.0-58449133629&doi=10.2376%2f0005-9366-122-8&partnerID=40&md5=8486e30eee4d46f5ac78efe444088080	Department of Biomedical Sciences, Biochemistry, University of Veterinary Medicine Vienna, Austria; Department of Biomedical Sciences, Biochemistry, University of Veterinary Medicine Vienna, 1210 Vienna, Veterinärplatz 1, Austria	Rettenbacher S., Department of Biomedical Sciences, Biochemistry, University of Veterinary Medicine Vienna, Austria, Department of Biomedical Sciences, Biochemistry, University of Veterinary Medicine Vienna, 1210 Vienna, Veterinärplatz 1, Austria; Palme R., Department of Biomedical Sciences, Biochemistry, University of Veterinary Medicine Vienna, Austria	Non-invasive methods to monitor adrenocortical activity need thorough validation. Besides analytical issues, the ability of the chosen test system to detect small changes in hormone concentrations triggered by stress perception must be evaluated. In this study, we biologically validated a previously established enzyme immunoassay (EIA) for corticosterone metabolites (CM) in chicken droppings. Adu…	Chicken; Corticosterone metabolites; Glucocorticoids; Stress	English	Article	Final		Scopus	2-s2.0-58449133629
	Bongiorno V.; Gariglio M.; Zambotto V.; Cappone E.E.; Biasato I.; Renna M.; Forte C.; Coudron C.; Bergagna S.; Gai F.; Schiavone A.	57441311800; 57208683238; 58035473700; 58035369200; 56741307800; 35722904300; 56432548200; 57211585616; 16202033700; 55329184000; 8259198000	Black soldier fly larvae used for environmental enrichment purposes: Can they affect the growth, slaughter performance, and blood chemistry of medium-growing chickens?	no slaughter context	2022	Frontiers in Veterinary Science	9		1064017				10.3389/fvets.2022.1064017	0	https://www.scopus.com/inward/record.uri?eid=2-s2.0-85145099211&doi=10.3389%2ffvets.2022.1064017&partnerID=40&md5=c9fa8686c477e18df26c7e4f04ffb58e	Department of Veterinary Sciences, University of Turin, Turin, Italy; National Research Council, Institute of Sciences of Food Production, Turin, Italy; Department of Agricultural, Forest and Food Sciences, University of Turin, Turin, Italy; Provincial Research and Advice Centre for Agriculture and Horticulture (Inagro vzw), Beitem, Roeselare, Belgium; Istituto Zooprofilattico Sperimentale del Pi…	Bongiorno V., Department of Veterinary Sciences, University of Turin, Turin, Italy; Gariglio M., Department of Veterinary Sciences, University of Turin, Turin, Italy; Zambotto V., National Research Council, Institute of Sciences of Food Production, Turin, Italy; Cappone E.E., Department of Veterinary Sciences, University of Turin, Turin, Italy; Biasato I., Department of Agricultural, Forest and F…	Introduction: This research has been aimed at evaluating the effects of live black soldier fly larvae (BSFL) (Hermetia illucens) on the growth, slaughtering performance, and blood parameters of medium-growing chickens. Methods: A total of 240, 28-day-old, Label Rouge Naked Neck chickens were allotted to four experimental groups, according to the gender (males-females) and to the absence (control …	animal welfare; free-range chickens; larva consumption duration; live larvae; organic rearing	English	Article	Final	All Open Access; Gold Open Access; Green Open Access	Scopus	2-s2.0-85145099211
	Maggini I.; Tahamtani F.M.; Cardinale M.; Fusani L.; Carere C.	6504751244; 56125726000; 7003493913; 6603684657; 55937055500	Body temperature upon mist-netting procedures in three species of migratory songbirds at a stopover site: Implications for welfare	no slaughter context	2018	Animal Welfare	27	2		93	101	8	10.7120/09627286.27.2.093	6	https://www.scopus.com/inward/record.uri?eid=2-s2.0-85053297895&doi=10.7120%2f09627286.27.2.093&partnerID=40&md5=7b85b47fa4acda14fcf848464c6f36bd	Konrad Lorenz Institute of Ethology, Department of Integrative Biology and Evolution, University of Veterinary Medicine, Vienna, Austria; Department of Animal Science, Aarhus University, Blichers Allé 20, Tjele, DK-8830, Denmark; Swedish University of Agricultural Science, Department of Aquatic Resources, Institute for Marine Research, Lysekil, Sweden; Department of Cognitive Biology, University …	Maggini I., Konrad Lorenz Institute of Ethology, Department of Integrative Biology and Evolution, University of Veterinary Medicine, Vienna, Austria; Tahamtani F.M., Department of Animal Science, Aarhus University, Blichers Allé 20, Tjele, DK-8830, Denmark; Cardinale M., Swedish University of Agricultural Science, Department of Aquatic Resources, Institute for Marine Research, Lysekil, Sweden; Fu…	Capturing wild birds with mist nets is very common for studying many aspects of avian biology. However, except for adrenocortical reactivity, little is known about other physiological responses to this potentially stressful procedure. Here, we focused on body temperature (Tb) in migratory songbirds, as large numbers are caught for population monitoring and studies of migratory biology. Tb is sens…	Animal welfare; Bird migration; Heterothermy; Hypothermia; Mist-netting; Stress response	English	Article	Final		Scopus	2-s2.0-85053297895
	Tuyttens F.; Heyndrickx M.; De Boeck M.; Moreels A.; Van Nuffel A.; Van Poucke E.; Van Coillie E.; Van Dongen S.; Lens L.	6701341176; 56234801300; 23099223800; 23101169200; 13005416800; 13005182300; 6602947244; 7003787695; 7004001062	Broiler chicken health, welfare and fluctuating asymmetry in organic versus conventional production systems	no slaughter context	2008	Livestock Science	113	2023-03-02		123	132	9	10.1016/j.livsci.2007.02.019	57	https://www.scopus.com/inward/record.uri?eid=2-s2.0-37549064370&doi=10.1016%2fj.livsci.2007.02.019&partnerID=40&md5=ae9af62070f830af41ed02662569f036	Animal Sciences, Institute for Agricultural and Fisheries Research, 9090 Melle, Scheldeweg 68, Belgium; Technology and Food, Institute for Agricultural and Fisheries Research, 9090 Melle, Brusselsesteenweg 370, Belgium; Terrestrial Ecology Unit, Department of Biology, Ghent University, 9000 Ghent, Ledeganckstraat 35, Belgium; Group of Evolutionary Biology, Department of Biology, University of Ant…	Tuyttens F., Animal Sciences, Institute for Agricultural and Fisheries Research, 9090 Melle, Scheldeweg 68, Belgium; Heyndrickx M., Technology and Food, Institute for Agricultural and Fisheries Research, 9090 Melle, Brusselsesteenweg 370, Belgium; De Boeck M., Terrestrial Ecology Unit, Department of Biology, Ghent University, 9000 Ghent, Ledeganckstraat 35, Belgium; Moreels A., Terrestrial Ecolog…	The aim of this study was to test three predictions: (1) that a combination of animal-based parameters indicates better health and welfare in broilers from organic versus conventional farms, (2) that broilers from organic farms show less fluctuating asymmetry (FA) than broilers from conventional farms, and (3) that, at the level of the individual bird, the relationship between FA and welfare is n…	Animal welfare; Campylobacter; Fluctuating asymmetry; Food safety; Poultry; Salmonella	English	Article	Final		Scopus	2-s2.0-37549064370
	Weimer S.L.; Wideman R.F.; Scanes C.G.; Mauromoustakos A.; Christensen K.D.; Vizzier-Thaxton Y.	57204457844; 7004655938; 7102338205; 6603909619; 7202687684; 55664189800	Broiler stress responses to light intensity, flooring type, and leg weakness as assessed by heterophil-to-lymphocyte ratios, serum corticosterone, infrared thermography, and latency to lie	no slaughter context	2020	Poultry Science	99	7		3301	3311	10	10.1016/j.psj.2020.03.028	10	https://www.scopus.com/inward/record.uri?eid=2-s2.0-85085203696&doi=10.1016%2fj.psj.2020.03.028&partnerID=40&md5=86b1692c33acf763bff907ac08ae5eba	Department of Poultry Science, University of Arkansas, Fayetteville, 72701, AR, United States; Agricultural Statistics Lab, University of Arkansas, Fayetteville, 72701, AR, United States; Office of Animal Welfare, Tyson Foods, Springdale, 72762, AR, United States	Weimer S.L., Department of Poultry Science, University of Arkansas, Fayetteville, 72701, AR, United States; Wideman R.F., Department of Poultry Science, University of Arkansas, Fayetteville, 72701, AR, United States; Scanes C.G., Department of Poultry Science, University of Arkansas, Fayetteville, 72701, AR, United States; Mauromoustakos A., Agricultural Statistics Lab, University of Arkansas, Fa…	Stress and leg weakness are detrimental to broiler production, health, and welfare. Traditional methods to evaluate stress may be stressful to the bird because they are invasive and require handling and restraint. Two studies examined the effects of light intensity and flooring on the following in broilers: 1) traditional methods for assessing stress using heterophil-to-lymphocyte ratios and seru…	infrared thermography; latency to lie; light intensity; stress; wire flooring	English	Article	Final	All Open Access; Gold Open Access	Scopus	2-s2.0-85085203696
	Strappini A.C.; Metz J.H.M.; Gallo C.; Frankena K.; Vargas R.; De Freslon I.; Kemp B.	31767693400; 7202027328; 7103169910; 7003533213; 57220526317; 55595370700; 9332390800	Bruises in culled cows: When, where and how are they inflicted?	no slaughter context	2013	Animal	7	3		485	491	6	10.1017/S1751731112001863	39	https://www.scopus.com/inward/record.uri?eid=2-s2.0-84873836610&doi=10.1017%2fS1751731112001863&partnerID=40&md5=bf352353ddc4774998159bb2a58bf07b	Adaptation Physiology Group, Department of Animal Sciences, Wageningen University, 6700 AH, Wageningen, PO Box 338, Netherlands; Instituto de Ciencia Animal, Facultad de Ciencias Veterinarias, Universidad Austral de Chile, Casilla 567, Isla Teja, Valdivia, Chile; Farm Technology Group, Department of Agrotechnology and Food Sciences, Wageningen University, 6700 AA, Wageningen, PO Box 17, Netherlan…	Strappini A.C., Adaptation Physiology Group, Department of Animal Sciences, Wageningen University, 6700 AH, Wageningen, PO Box 338, Netherlands, Instituto de Ciencia Animal, Facultad de Ciencias Veterinarias, Universidad Austral de Chile, Casilla 567, Isla Teja, Valdivia, Chile, Instituto de Ciencia Animal, Facultad de Ciencias Veterinarias, Universidad Austral de Chile, Isla Teja, Valdivia, Casi…	In Chile, cow carcasses present the highest bruise prevalence compared with other cattle categories; however, the causes of the bruises are frequently unknown. In this study, 52 cull cows were transported to the slaughterhouse in three batches under identical transport conditions. A combination of direct observation and video analyses was used to determine moment, pre-slaughter stage and cause of…	bruises; cows; pre-slaughter handling; transport	English	Article	Final	All Open Access; Hybrid Gold Open Access	Scopus	2-s2.0-84873836610
	Buijs S.; van Poucke E.; van Dongen S.; Lens L.; Tuyttens F.A.M.	25635437300; 13005182300; 56243363700; 7004001062; 6701341176	Cage size and enrichment effects on the bone quality and fluctuating asymmetry of fattening rabbits	no slaughter context	2012	Journal of Animal Science	90	10		3568	3573	5	10.2527/jas.2012-5141	9	https://www.scopus.com/inward/record.uri?eid=2-s2.0-84882660824&doi=10.2527%2fjas.2012-5141&partnerID=40&md5=22d69cbe0bc7a687d826391282f9ce82	Animal Sciences Unit, Institute for Agricultural and Fisheries Research, B-9090, Melle, Belgium; Evolutionary Ecology Group, University of Antwerp, B-2020, Antwerp, Groenenborgerlaan 171, Belgium; Terrestrial Ecology Unit, Department of Biology, Ghent University, B-9000 Ghent, K. L. Ledeganckstraat 35, Belgium	Buijs S., Animal Sciences Unit, Institute for Agricultural and Fisheries Research, B-9090, Melle, Belgium; van Poucke E., Animal Sciences Unit, Institute for Agricultural and Fisheries Research, B-9090, Melle, Belgium; van Dongen S., Evolutionary Ecology Group, University of Antwerp, B-2020, Antwerp, Groenenborgerlaan 171, Belgium; Lens L., Terrestrial Ecology Unit, Department of Biology, Ghent U…	We studied the effect of increased cage size on different aspects of bone quality (bone strength, diameter, weight, and length) and fluctuating asymmetry (FA). Such characteristics may indicate improved animal welfare, as greater bone quality may decrease fracture incidence during handling, whereas decreased FA has been suggested to signal decreased stress. As stress is likely not only influenced…	Bone strength; Fattening rabbit; Fluctuating asymmetry; Stocking density; Welfare	English	Article	Final		Scopus	2-s2.0-84882660824
	Deiss V.; Temple D.; Ligout S.; Racine C.; Bouix J.; Terlouw C.; Boissy A.	24733981100; 26634599700; 6602254393; 26634353600; 7006623994; 6603022097; 56264571300	Can emotional reactivity predict stress responses at slaughter in sheep?	no slaughter context	2009	Applied Animal Behaviour Science	119	2023-04-03		193	202	9	10.1016/j.applanim.2009.03.018	41	https://www.scopus.com/inward/record.uri?eid=2-s2.0-67349254097&doi=10.1016%2fj.applanim.2009.03.018&partnerID=40&md5=8825fd1acae23c553bcdf7a7a83b131b	INRA, UR1213 Herbivores, Centre de Clermont-Ferrand/Theix, F-63122 Saint-Genes Champanelle, France; INRA UE LaFage, F-12250 Roquefort-sur-soulzon, France; INRA SAGA, F-31326 Castanet-Tolosan, BP 52627, France	Deiss V., INRA, UR1213 Herbivores, Centre de Clermont-Ferrand/Theix, F-63122 Saint-Genes Champanelle, France; Temple D., INRA, UR1213 Herbivores, Centre de Clermont-Ferrand/Theix, F-63122 Saint-Genes Champanelle, France; Ligout S., INRA, UR1213 Herbivores, Centre de Clermont-Ferrand/Theix, F-63122 Saint-Genes Champanelle, France; Racine C., INRA UE LaFage, F-12250 Roquefort-sur-soulzon, France; B…	The slaughter period is very complex and may represent different types of stress for the animal. The way and extent animals react to these stress factors depend on their individual emotional reactivity. The objective of the present study was to determine in sheep relationships between reactivity profiles measured during rearing, plasma cortisol levels in blood collected at exsanguination, and met…	Emotional reactivity; Sheep; Slaughter stress; Welfare	English	Article	Final		Scopus	2-s2.0-67349254097
	Chou J.-Y.; O’Driscoll K.; Sandercock D.A.; D’Eath R.B.	57201978152; 55398803000; 6603906505; 35866861400	Can increased dietary fibre level and a single enrichment device reduce the risk of tail biting in undocked growing-finishing pigs in fully slatted systems?	no slaughter context	2020	PLoS ONE	15	10 October	e0241619				10.1371/journal.pone.0241619	5	https://www.scopus.com/inward/record.uri?eid=2-s2.0-85094934850&doi=10.1371%2fjournal.pone.0241619&partnerID=40&md5=e3bfc0dd84ee0ced2e2fcccc5e37a8cc	Pig Development Department, Teagasc,, Fermoy, Co. Cork, Ireland; Animal and Veterinary Sciences Research Group, Scotland’s Rural College, Easter Bush, Midlothian, United Kingdom; Royal (Dick) School of Veterinary Studies, University of Edinburgh, Easter Bush, Midlothian, United Kingdom	Chou J.-Y., Pig Development Department, Teagasc,, Fermoy, Co. Cork, Ireland, Animal and Veterinary Sciences Research Group, Scotland’s Rural College, Easter Bush, Midlothian, United Kingdom, Royal (Dick) School of Veterinary Studies, University of Edinburgh, Easter Bush, Midlothian, United Kingdom; O’Driscoll K., Pig Development Department, Teagasc,, Fermoy, Co. Cork, Ireland; Sandercock D.A., An…	This study evaluated the effectiveness of combined dietary and enrichment strategies to manage tail biting in pigs with intact tails in a conventional fully-slatted floor housing system. A 2 × 2 × 2 factorial design was used. Pigs had either a high fibre (weaner 5.3% and finisher 11.6% of crude fibre) or standard fibre diet (weaner 3.7% and finisher 5.9% of crude fibre). In the weaner stage, pigs…		English	Article	Final	All Open Access; Gold Open Access; Green Open Access	Scopus	2-s2.0-85094934850
	Frondelius L.; Jauhiainen L.; Niskanen O.; Mughal M.; Sairanen A.	56436810500; 6602455454; 56826137400; 57006306400; 56019788400	Can on-farm animal welfare explain relative production differences between dairy herds?	no slaughter context	2020	Animal Welfare	29	4		449	461	12	10.7120/09627286.29.4.449	0	https://www.scopus.com/inward/record.uri?eid=2-s2.0-85095969413&doi=10.7120%2f09627286.29.4.449&partnerID=40&md5=44f4f03645ddaa6c79df0717609094c8	Natural Resources Institute Finland (Luke), Production Systems, Halolantie 31 A, Maaninka, 71750, Finland; University of Eastern Finland, Department of Environmental and Biological Sciences, PO Box 111, Joensuu, 80101, Finland	Frondelius L., Natural Resources Institute Finland (Luke), Production Systems, Halolantie 31 A, Maaninka, 71750, Finland; Jauhiainen L., Natural Resources Institute Finland (Luke), Production Systems, Halolantie 31 A, Maaninka, 71750, Finland; Niskanen O., Natural Resources Institute Finland (Luke), Production Systems, Halolantie 31 A, Maaninka, 71750, Finland; Mughal M., University of Eastern Fi…	The aim of this study was to investigate factors responsible for between-herd variation in milk production, when genetic variation is controlled. Quantitative information regarding farms’ production environment and animal welfare, as evaluated annually by veterinarians and health and feeding records, were the factors studied. Principal component analysis was used to reduce the production environm…	Animal welfare; Dairy cattle; Feeding; Milk production; Principal component analysis; Routine herd data	English	Article	Final		Scopus	2-s2.0-85095969413
	Rocha L.M.; Velarde A.; Dalmau A.; Saucier L.; Faucitano L.	55778625300; 6701775922; 24069754400; 6701691303; 8952115800	Can the monitoring of animal welfare parameters predict pork meat quality variation through the supply chain (From farm to slaughter)?	no slaughter context	2016	Journal of Animal Science	94	1		359	376	17	10.2527/jas.2015-9176	26	https://www.scopus.com/inward/record.uri?eid=2-s2.0-84975856188&doi=10.2527%2fjas.2015-9176&partnerID=40&md5=6f4c1dbdfc4aeb6f60e82637f8dde939	Agriculture and Agri-Food Canada, 2000 College Street, Sherbrooke, J1M 0C8, Canada; Department of Animal Science, Université Laval, Quebec City, G1V 0A6, Canada; Institute of Nutrition and Functional Foods, Université Laval, Quebec City, G1V0A6, Canada; Institut de Recerca i Tecnologia Agroalimentáries (IRTA), Veinat de Sies s/n, Monells, 17121, Spain	Rocha L.M., Agriculture and Agri-Food Canada, 2000 College Street, Sherbrooke, J1M 0C8, Canada, Department of Animal Science, Université Laval, Quebec City, G1V 0A6, Canada, Institute of Nutrition and Functional Foods, Université Laval, Quebec City, G1V0A6, Canada; Velarde A., Institut de Recerca i Tecnologia Agroalimentáries (IRTA), Veinat de Sies s/n, Monells, 17121, Spain; Dalmau A., Institut …	The objective of this study was to assess the relationship between the animal welfare conditions evaluated through the supply chain and pork quality variation. A total of 4,680 pigs from 12 farms—5 animal welfare improved raising system (AWIRS) and 7 conventional raising system (CON) farms—were assessed from farm to slaughter through a comprehensive audit protocol merging the European Welfare Qua…	Animal welfare; Audit; Behavior; Meat quality; Pigs	English	Article	Final		Scopus	2-s2.0-84975856188
	Moody C.M.; Picketts V.A.; Mason G.J.; Dewey C.E.; Niel L.	57203313031; 57202017825; 7202151322; 55894159500; 9133247800	Can you handle it? Validating negative responses to restraint in cats	no slaughter context	2018	Applied Animal Behaviour Science	204			94	100	6	10.1016/j.applanim.2018.04.012	25	https://www.scopus.com/inward/record.uri?eid=2-s2.0-85046754847&doi=10.1016%2fj.applanim.2018.04.012&partnerID=40&md5=cf3ce5899268bbe0351b4d58ef955caf	Department of Population Medicine, Ontario Veterinary College, University of Guelph, 50 Stone Road E., Guelph, N1G 2W1, ON, Canada; Department of Animal Biosciences, Ontario Agricultural College, University of Guelph, 50 Stone Road E., Guelph, N1G 2W1, ON, Canada	Moody C.M., Department of Population Medicine, Ontario Veterinary College, University of Guelph, 50 Stone Road E., Guelph, N1G 2W1, ON, Canada; Picketts V.A., Department of Population Medicine, Ontario Veterinary College, University of Guelph, 50 Stone Road E., Guelph, N1G 2W1, ON, Canada; Mason G.J., Department of Animal Biosciences, Ontario Agricultural College, University of Guelph, 50 Stone R…	Cats routinely undergo handling and restraint for examinations and procedures throughout their lifetime. In recent years there has been increased awareness that some forms of restraint have the potential to negatively impact cat health and welfare, but there has been limited research to assess alternatives. Full-body restraint is known to be aversive and cause stress responses across a range of s…	Behaviour; Feline; Restraint; Unfamiliar person test; Welfare	English	Article	Final		Scopus	2-s2.0-85046754847
	Roche S.M.; Renaud D.L.; Genore R.; Shock D.A.; Bauman C.; Croyle S.; Barkema H.W.; Dubuc J.; Keefe G.P.; Kelton D.F.	55038377500; 56494627300; 57215193758; 56584089200; 57189344369; 56090304900; 7005859347; 56664175900; 7003388590; 7003316905	Canadian National Dairy Study: Describing Canadian dairy producer practices and perceptions surrounding cull cow management	no slaughter context	2020	Journal of Dairy Science	103	4		3414	3421	7	10.3168/jds.2019-17390	9	https://www.scopus.com/inward/record.uri?eid=2-s2.0-85080102172&doi=10.3168%2fjds.2019-17390&partnerID=40&md5=f729bde9a33fbf38ba73e2ea31b70667	ACER Consulting Ltd., Guelph, N1G 5L3, Ontario, Canada; Department of Population Medicine, University of Guelph, Guelph, N1G 2W1, ON, Canada; Department of Production Animal Health, University of Calgary, Calgary, T2N 1N4, AB, Canada; Faculté de Médecine Vétérinaire, Université de Montréal, St-Hyacinthe, J2S 2M2, QC, Canada; Department of Health Management, University of Prince Edward Island, Cha…	Roche S.M., ACER Consulting Ltd., Guelph, N1G 5L3, Ontario, Canada, Department of Population Medicine, University of Guelph, Guelph, N1G 2W1, ON, Canada; Renaud D.L., ACER Consulting Ltd., Guelph, N1G 5L3, Ontario, Canada, Department of Population Medicine, University of Guelph, Guelph, N1G 2W1, ON, Canada; Genore R., ACER Consulting Ltd., Guelph, N1G 5L3, Ontario, Canada; Shock D.A., ACER Consul…	Farmer decisions surrounding culling have an important effect on the health and welfare of cull cows. The objectives of this study were to describe the self-reported shipment behaviors of Canadian dairy producers and understand farmer perspectives on the factors that were most influential in their decision to cull a cow. A nationwide survey was administered between March and April 2015 that inclu…	behavior; compromised cow; culling; farmer perception; transportation	English	Article	Final	All Open Access; Bronze Open Access	Scopus	2-s2.0-85080102172
	Câmara N.; Sierra E.; Fernández A.; Arbelo M.; de Quirós Y.B.; Arregui M.; Consoli F.; Herráez P.	57191486481; 15742962600; 56673009900; 6603561403; 40461313300; 57196123112; 57214756677; 57194503614	Capture myopathy and stress cardiomyopathy in a live-stranded risso’s dolphin (Grampus griseus) in rehabilitation	no slaughter context	2020	Animals	10	2	220				10.3390/ani10020220	10	https://www.scopus.com/inward/record.uri?eid=2-s2.0-85079052257&doi=10.3390%2fani10020220&partnerID=40&md5=336a70dac73af7ffb9ff3e79c60bb8f4	Veterinary Histology and Pathology, Institute of Animal Health and Food Safety (IUSA), Veterinary School, University of Las Palmas de Gran Canaria, Arucas, 35416, Las Palmas de Gran Canaria, Spain; Department of Neuroscience, Imaging and Clinical Sciences, University G. D’Annunzio, Chieti, 66100, Italy	Câmara N., Veterinary Histology and Pathology, Institute of Animal Health and Food Safety (IUSA), Veterinary School, University of Las Palmas de Gran Canaria, Arucas, 35416, Las Palmas de Gran Canaria, Spain; Sierra E., Veterinary Histology and Pathology, Institute of Animal Health and Food Safety (IUSA), Veterinary School, University of Las Palmas de Gran Canaria, Arucas, 35416, Las Palmas de Gr…	Capture myopathy (CM) is described in wild animals as a metabolic syndrome resulting from the extreme stress suffered during and after capture, handling, restraint, and transport. Although CM has been characterized in many species of cetaceans, descriptions of cardiac injury— an important component of this syndrome, and, according to previous authors, comparable to the existing human pathology so…	Animal conservation; Animal welfare; Biochemistry; Cetaceans; Histopathology; Immunohistochemistry	English	Article	Final	All Open Access; Gold Open Access; Green Open Access	Scopus	2-s2.0-85079052257
	Bonacic C.; Feber R.E.; Macdonald D.W.	6602362559; 6603360149; 7401463172	Capture of the vicuña (Vicugna vicugna) for sustainable use: Animal welfare implications	no slaughter context	2006	Biological Conservation	129	4		543	550	7	10.1016/j.biocon.2005.11.021	28	https://www.scopus.com/inward/record.uri?eid=2-s2.0-33644891594&doi=10.1016%2fj.biocon.2005.11.021&partnerID=40&md5=873e4422466aa9e35d38fb7912070404	Department of Animal Science, Faculty of Agriculture and Forestry Science, Pontificia Universidad Católica de Chile, Santiago, Casilla 306, Correo 22, Chile; Department of Zoology, University of Oxford, Tubney House, Abingdon, Oxon OX13 5QL, Abingdon Road Tubney, United Kingdom	Bonacic C., Department of Animal Science, Faculty of Agriculture and Forestry Science, Pontificia Universidad Católica de Chile, Santiago, Casilla 306, Correo 22, Chile, Department of Zoology, University of Oxford, Tubney House, Abingdon, Oxon OX13 5QL, Abingdon Road Tubney, United Kingdom; Feber R.E., Department of Zoology, University of Oxford, Tubney House, Abingdon, Oxon OX13 5QL, Abingdon Ro…	The current program of vicuña conservation includes their live-capture for wool harvest in the Andes Region in northern Chile. Here, we describe studies that assess the impacts on the species of different variables relating to the capture process. The immediate physical and physiological effects on vicuña of contrasting capture methods, chase distances and restraint were measured. Comparisons bet…	Andean communities; Animal welfare; Camelids; Capture; Stress; Sustainable use	English	Article	Final		Scopus	2-s2.0-33644891594
	Jessop T.S.	7003335516	Capture predicates corticosterone responses and a low recapture likelihood in a varanid lizard	no slaughter context	2022	Wildlife Research							10.1071/WR22013	1	https://www.scopus.com/inward/record.uri?eid=2-s2.0-85134522743&doi=10.1071%2fWR22013&partnerID=40&md5=c9f9bbbcbaea3a1b1ab17a4a348367a0	Centre for Integrative Ecology, School of Life and Environmental Sciences, Deakin University, Waurn Ponds, 3216, VIC, Australia	Jessop T.S., Centre for Integrative Ecology, School of Life and Environmental Sciences, Deakin University, Waurn Ponds, 3216, VIC, Australia	Context: Understanding both the short- and long-term consequences of live animal capture is desirable to limit potential data biases or compromise animal welfare. The short-term elevation of glucocorticoid hormones in animals is an expected short-term stress consequence of trapping and restraint experiences. However, because these hormones also influence behaviour and memory, they may provide a p…	adrenocortical responsiveness; capture stressor; lace monitor; learning; live animal trapping; memory; reptile; restraint	English	Article	Article in press	All Open Access; Hybrid Gold Open Access	Scopus	2-s2.0-85134522743
	Farias S.S.; Gameiro M.B.P.; Montechese A.C.D.; Bernardino T.; Oliveira C.A.A.; Zanella A.J.	57223260435; 57202717828; 57221787080; 57192176201; 55245741800; 7102861452	Case report: The use of the awin welfare assessment protocol to monitor a group of abandoned donkeys; [Estudo de caso: O uso do protocolo awin de avaliação de bem-estar para monitorar um grupo de jumentos abandonados]	no slaughter context	2021	Brazilian Journal of Veterinary Research and Animal Science	58		e174701				10.11606/ISSN.1678-4456.BJVRAS.2021.174701	2	https://www.scopus.com/inward/record.uri?eid=2-s2.0-85105419673&doi=10.11606%2fISSN.1678-4456.BJVRAS.2021.174701&partnerID=40&md5=44eb0f991a840ca1b0f4b92685f5ef14	Universidade de São Paulo, Faculdade de Medicina Veterinária e Zootecnia, Departamento de Medicina Veterinária Preventiva e Saúde Animal, Pirassununga – SP, Brazil; Universidade Federal da Bahia, Escola de Medicina Veterinária e Zootecnia, Departamento de Medicina Veterinária Preventiva e Produção Animal, Salvador – BA, Brazil	Farias S.S., Universidade de São Paulo, Faculdade de Medicina Veterinária e Zootecnia, Departamento de Medicina Veterinária Preventiva e Saúde Animal, Pirassununga – SP, Brazil; Gameiro M.B.P., Universidade de São Paulo, Faculdade de Medicina Veterinária e Zootecnia, Departamento de Medicina Veterinária Preventiva e Saúde Animal, Pirassununga – SP, Brazil; Montechese A.C.D., Universidade de São P…	The objective of this study was to reach a diagnosis of the living conditions of abandoned donkeys kept in a restricted farm area through the assessment of their welfare level utilizing the AWIN protocol as a methodological tool. These animals were supposed to be sent to slaughter, but after the activity was temporarily banned, they were abandoned by traders. The protocol of welfare assessment wa…	Asinine; Assessment protocol; Behavioral assessments; Mistreatment; Northeast region	English	Article	Final	All Open Access; Gold Open Access	Scopus	2-s2.0-85105419673
	Windsor P.A.; Bush R.D.	8376518000; 16034621000	Caseous lymphadenitis: Present and near forgotten from persistent vaccination?	no slaughter context	2016	Small Ruminant Research	142			6	10	4	10.1016/j.smallrumres.2016.03.023	15	https://www.scopus.com/inward/record.uri?eid=2-s2.0-84977150524&doi=10.1016%2fj.smallrumres.2016.03.023&partnerID=40&md5=df21d70bcacb7cf5debd297b5bc6b3a3	Faculty of Veterinary Science, The University of Sydney, Camden, 2570, NSW, Australia	Windsor P.A., Faculty of Veterinary Science, The University of Sydney, Camden, 2570, NSW, Australia; Bush R.D., Faculty of Veterinary Science, The University of Sydney, Camden, 2570, NSW, Australia	Ovine caseous lymphadenitis (CLA) is a serious disease of the global sheep industry, mainly causing losses from abattoir condemnations and in some countries, compromised productivity. However in Australia, CLA is now of minimal concern on-farm with cases reported rarely, although the disease remains an important food quality issue for abattoirs. There is evidence from longitudinal abattoir survei…	Caseous lymphadenitis; Cheesy gland; Disease control; Sheep health; Vaccination	English	Article	Final		Scopus	2-s2.0-84977150524
	Pereira-da-Silva E.M.; de Melo M.P.; de Oliveira R.H.F.; Pugine S.M.P.	6507130723; 7006013242; 35184796900; 9941064800	Catalase and lactate dehydrogenase activity in tilapia subjected to contention stress: Effect of the background color; [Atividade da catalase e da lactato desidrogenase em tilápias submetidas a estresse de confinamento: Efeito da cor do ambiente]	no slaughter context	2012	Ciencia Rural	42	5		894	899	5	10.1590/s0103-84782012000500022	3	https://www.scopus.com/inward/record.uri?eid=2-s2.0-84862872576&doi=10.1590%2fs0103-84782012000500022&partnerID=40&md5=a387a83655b8a1b6808c83abcf7a10cc	Laboratório de Comportamento de Peixes, Departamento de Ciências Básicas, Faculdade de Zootecnia e Engenharia de Alimentos (FZEA), Universidade de São Paulo (USP), 13635-900, Pirassununga, SP, Brazil; Laboratório de Química Biológica, Departamento de Ciências Básicas, FZEA, USP, Pirassununga, SP, Brazil	Pereira-da-Silva E.M., Laboratório de Comportamento de Peixes, Departamento de Ciências Básicas, Faculdade de Zootecnia e Engenharia de Alimentos (FZEA), Universidade de São Paulo (USP), 13635-900, Pirassununga, SP, Brazil; de Melo M.P., Laboratório de Química Biológica, Departamento de Ciências Básicas, FZEA, USP, Pirassununga, SP, Brazil; de Oliveira R.H.F., Laboratório de Comportamento de Peix…	We assess the effects of the background color on the growth and antioxidant enzyme catalase (CAT) and lactate dehydrogenase (LDH) in Nile tilapia (n=24; 36.2±3.6g). Eight fish were killed for assessment of basal activity of the enzymes and the others remained isolated for 14 days under white or blue light spectrum (n=8 fish/treatment). Then each animal were subjected to a daily stress of confinem…	Confinement; Growth; Metabolism; Oreochromis niloticus; Oxidative stress	English	Article	Final	All Open Access; Gold Open Access; Green Open Access	Scopus	2-s2.0-84862872576
	Díez J.G.; Saraiva C.; Coelho A.C.	55184801500; 23398280700; 34970835100	Cattle farmers' perceptions about livestock policy	no slaughter context	2015	Large Animal Review	21	3		115	123	8		3	https://www.scopus.com/inward/record.uri?eid=2-s2.0-84952047429&partnerID=40&md5=fc5d5e9125800171cd03e689590638c4	CECAV, Centro de Ciência Animal e Veterinária, Universidade de Trás-os-Montes e Alto Douro, Quinta de Prados, Vila Real, 5000-801, Portugal	Díez J.G., CECAV, Centro de Ciência Animal e Veterinária, Universidade de Trás-os-Montes e Alto Douro, Quinta de Prados, Vila Real, 5000-801, Portugal; Saraiva C., CECAV, Centro de Ciência Animal e Veterinária, Universidade de Trás-os-Montes e Alto Douro, Quinta de Prados, Vila Real, 5000-801, Portugal; Coelho A.C., CECAV, Centro de Ciência Animal e Veterinária, Universidade de Trás-os-Montes e A…	Nowadays, policy of livestock production in the European Union is multidisciplinary including areas such as animal welfare, animal health, transport, slaughter, traceability, farm facilities and food safety among others. Several factors (age, education, veterinary technical support, unknown of information sources) are the main constrains of farmers' policy knowledge and its compliance. In additio…	Animal heath; Cattle; Farmers; Food safety; Knowledge; Policy	English	Article	Final		Scopus	2-s2.0-84952047429
	Ferreira K.C.; Furtado A.C.; Flores H.P.; de Oliveira P.R.O.; Gonçalves A.G.; de Oliveira D.M.	57216585755; 57216591857; 57216581236; 57216581546; 57216586228; 55328226200	Cattle loading rates in different truck models and their relationship with bruises on bovine carcasses; [Taxa de lotação em diferentes modelos de carrocerias e sua relação com hematomas em carcaças bovinas]	no slaughter context	2020	Ciencia Rural	50	5	e20190819				10.1590/0103-8478cr20190819	2	https://www.scopus.com/inward/record.uri?eid=2-s2.0-85084007506&doi=10.1590%2f0103-8478cr20190819&partnerID=40&md5=c995c846cfeb8db2217bcb84bdd49601	Universidade Estadual de Mato Grosso do Sul (UEMS), Unidade Universitária de Aquidauana, Aquidauana, MS, Brazil; Universidade Estadual de Mato Grosso do Sul (UEMS), Aquidauana, 79200-000, MS, Brazil	Ferreira K.C., Universidade Estadual de Mato Grosso do Sul (UEMS), Unidade Universitária de Aquidauana, Aquidauana, MS, Brazil; Furtado A.C., Universidade Estadual de Mato Grosso do Sul (UEMS), Unidade Universitária de Aquidauana, Aquidauana, MS, Brazil; Flores H.P., Universidade Estadual de Mato Grosso do Sul (UEMS), Unidade Universitária de Aquidauana, Aquidauana, MS, Brazil; de Oliveira P.R.O.…	This study sought to evaluate the number of bruises on bovine carcasses and their relationship with loading rates in different truck models. Bruising percentages in the hindquarter, forequarter and short rib regions were evaluated. The space occupied on the truck by each animal in m2 was defined as the Practiced area, obtained by dividing the body area by the number of males and females transport…	Animal welfare; Loading density; Pre-slaughter handling; Road transport	English	Article	Final	All Open Access; Gold Open Access; Green Open Access	Scopus	2-s2.0-85084007506
	Jibat T.; Ejeta G.; Asfaw Y.; Wudie A.	57201181881; 36343389400; 55404460700; 57211371165	Causes of abattoir condemnation in apparently healthy slaughtered sheep and goats at HELMEX abattoir, Debre Zeit, Ethiopia	no slaughter context	2008	Revue de Medecine Veterinaire	159	5		305	311	6		27	https://www.scopus.com/inward/record.uri?eid=2-s2.0-46049095894&partnerID=40&md5=1da8a84ce8a7f2a22bce6443d7993a02	Faculty of Veterinary Medicine, University of Gondar, Gondar, P. O. Box 196, Ethiopia; Department of Microbiology and Veterinary Public Health, Faculty of Veterinary Medicine, Addis Ababa University, Debre Zeit, P.O. Box 34, Ethiopia; Department of Clinical Studies, Faculty of Veterinary Medicine, Addis Ababa University, Debre Zeit, P.O. Box 34, Ethiopia; HELMEX Slaughter House, Debre Zeit, Ethio…	Jibat T., Faculty of Veterinary Medicine, University of Gondar, Gondar, P. O. Box 196, Ethiopia; Ejeta G., Department of Microbiology and Veterinary Public Health, Faculty of Veterinary Medicine, Addis Ababa University, Debre Zeit, P.O. Box 34, Ethiopia, Department of Farm Animal Health, Faculty of Veterinary Medicine, Utrecht University, 3584 CN, Utrecht, Marburglaan 2, Netherlands; Asfaw Y., De…	Sheep and goats in Ethiopia are the major sources of meat and offal exported to the Middle East. The leather industry derives most of the raw materials in the form of skin from small ruminants. However, a significant amount of organs and carcasses are condemned in the abattoir due to various diseases and pathological abnormalities. This study was conducted from December 2005 to June 2006 to deter…	Abattoir condemnation; Carcass; Financial loss; Goats; Organ; Sheep	English	Article	Final		Scopus	2-s2.0-46049095894
	Gade P.B.; Christensen L.; Baltzer M.; Petersen J.V.	6602448851; 22957112700; 22956946000; 7401502840	Causes of pre-slaughter mortality in Danish slaughter pigs with special emphasis on transport	no slaughter context	2007	Animal Welfare	16	4		459	470	11		24	https://www.scopus.com/inward/record.uri?eid=2-s2.0-35948985966&partnerID=40&md5=8049d0528370eccfe95011d5b71633ba	Danish Meat Research Institute, DK-4000 Roskilde, Maglegaardsvej 2, Denmark; Danish Bacon and Meat Council, DK-1609 Copenhagen, Axelborg, Axeltorv 3, Denmark	Gade P.B., Danish Meat Research Institute, DK-4000 Roskilde, Maglegaardsvej 2, Denmark; Christensen L., Danish Meat Research Institute, DK-4000 Roskilde, Maglegaardsvej 2, Denmark; Baltzer M., Danish Meat Research Institute, DK-4000 Roskilde, Maglegaardsvej 2, Denmark; Petersen J.V., Danish Bacon and Meat Council, DK-1609 Copenhagen, Axelborg, Axeltorv 3, Denmark	Annual statistics for transport and lairage mortality were used to investigate factors leading to pre-slaughter mortality in Danish pigs. A subset of material from 2002, amounting to 17.8 million pigs, was used for a more detailed study of the effect of producer, haulier, abattoir and transport distance (< 100, 100-200 and > 200 km) on transport mortality. Total mortality was reduced eight-fold d…	Animal welfare; Lairage; Mortality; Pigs; Slaughter; Transport	English	Article	Final		Scopus	2-s2.0-35948985966
	Márquez L.C.E.	57222323516	Certify welfare: Importance and experience in farm of chickens (broilers) and egg laying hens; [Certificar el bienestar: Importancia y experiencia en aves de granja pollos (broiler) y gallinas ponedoras]	no slaughter context	2021	Revista Facultad Nacional de Agronomia Medellin	74	1		S38	S39	1		0	https://www.scopus.com/inward/record.uri?eid=2-s2.0-85102284438&partnerID=40&md5=7fe9cbcbc388add4805a33a6f964ac63	Humane Latinoamrica Organization, Colombia	Márquez L.C.E., Humane Latinoamrica Organization, Colombia	Introduction. Global consumer trends point out that new generations of animal food buyers tend to a conscious consumption, they want to know where it comes from and how what they eat is produced. Justification. The demands of the consumer are transcending to the legislation, where laws and projects have been promoted before the governments in order to impact the production of animals, their healt…	Efficiency; Productivity and traceability; Scientific-consumer training Credibility	English	Article	Final		Scopus	2-s2.0-85102284438
	Bansiddhi P.; Brown J.L.; Thitaram C.; Punyapornwithaya V.; Somgird C.; Edwards K.L.; Nganvongpanit K.	56964454700; 7409454443; 23096340200; 34973240100; 24722064400; 55981601500; 10938930600	Changing trends in elephant camp management in northern Thailand and implications for welfare	no slaughter context	2018	PeerJ	2018	11	e5996				10.7717/peerj.5996	31	https://www.scopus.com/inward/record.uri?eid=2-s2.0-85057766637&doi=10.7717%2fpeerj.5996&partnerID=40&md5=e3a6844bba6faeaddc0b9e91cb778f66	Center of Excellence in Elephant and Wildlife Research, Faculty of Veterinary Medicine, Chiang Mai University, Chiang Mai, Thailand; Center for Species Survival, Smithsonian Conservation Biology Institute, Front Royal, VA, United States; Department of Companion Animal and Wildlife Clinic, Faculty of Veterinary Medicine, Chiang Mai University, Chiang Mai, Thailand; Department of Food Animal Clinic…	Bansiddhi P., Center of Excellence in Elephant and Wildlife Research, Faculty of Veterinary Medicine, Chiang Mai University, Chiang Mai, Thailand; Brown J.L., Center of Excellence in Elephant and Wildlife Research, Faculty of Veterinary Medicine, Chiang Mai University, Chiang Mai, Thailand, Center for Species Survival, Smithsonian Conservation Biology Institute, Front Royal, VA, United States; Th…	Background: Elephant camps are among the most attractive destinations in Thailand for tourists from many countries. A wide range of management strategies are used by these camps, which can have varied impacts on health and welfare of elephants. Methods: This study surveyed 33 camps with 627 elephants in northern Thailand to quantify the types of management practices and work activities experience…		English	Article	Final	All Open Access; Gold Open Access; Green Open Access	Scopus	2-s2.0-85057766637
	Penner, G. B.; Aschenbach, J. R.; Wood, K.; Walpole, M. E.; Kanafany-Guzman, R.; Hendrick, S.; Campbell, J.		Characterising barrier function among regions of the gastrointestinal tract in Holstein steers	no slaughter context	2014	ANIMAL PRODUCTION SCIENCE	54	9		1282	1287		10.1071/AN14285					The objective of this study was to characterise the regional variation in the barrier function of the gastrointestinal tract in Holstein calves using the flux rates of mannitol and inulin as permeability markers and tissue conductance (G(t)) as an electrophysiological indicator of barrier function. Six Holstein steer calves (6 months of age) fed a common diet were used. Calves were killed by capt…			Article			WOS
	Mijares S.; Calvo-Lorenzo M.; Betts N.; Alexander L.; Edwards-Callaway L.N.	57219624801; 56453485000; 57224442829; 57201992410; 55597935400	Characterization of fed cattle mobility during the covid-19 pandemic	no slaughter context	2021	Animals	11	6	1749				10.3390/ani11061749	4	https://www.scopus.com/inward/record.uri?eid=2-s2.0-85107579972&doi=10.3390%2fani11061749&partnerID=40&md5=08823fbeab86c8dfac11ca1d92a12d9e	College of Veterinary Medicine and Biomedical Sciences, Colorado State University, 1601 Campus Delivery, Fort Collins, 80523, CO, United States; Elanco Animal Health, 2500 Innovation Way, Greenfield, 46140, IN, United States; Cargill Protein Headquarters, 825 E Douglas Ave, Wichita, 67202, KS, United States; Department of Animal Sciences, Colorado State University, 1171 Campus Delivery, Fort Coll…	Mijares S., College of Veterinary Medicine and Biomedical Sciences, Colorado State University, 1601 Campus Delivery, Fort Collins, 80523, CO, United States; Calvo-Lorenzo M., Elanco Animal Health, 2500 Innovation Way, Greenfield, 46140, IN, United States; Betts N., Elanco Animal Health, 2500 Innovation Way, Greenfield, 46140, IN, United States; Alexander L., Cargill Protein Headquarters, 825 E Do…	The COVID-19 pandemic had significant consequences on cattle slaughter capacity in the United States. Although industry stakeholders implemented strategies to minimize cattle welfare impacts of increased weights, days on feed (DOF), and increasing temperatures, there were concerns that mobility challenges would be observed at slaughter facilities. The objectives of this study were to characterize…	Cattle; COVID-19; Days on feed; Feedlot; Mobility; Welfare	English	Article	Final	All Open Access; Gold Open Access; Green Open Access	Scopus	2-s2.0-85107579972
	Davis M.K.; Engle T.E.; Cadaret C.N.; Cramer M.C.; Bigler L.J.; Wagner J.J.; Edwards-Callaway L.N.	57220838280; 7003628267; 57190969605; 56785355100; 57219627134; 16159067600; 55597935400	Characterizing heat mitigation strategies utilized by beef processors in the United States	no slaughter context	2022	Translational Animal Science	6	1		1	8	7	10.1093/tas/txab231	0	https://www.scopus.com/inward/record.uri?eid=2-s2.0-85125197120&doi=10.1093%2ftas%2ftxab231&partnerID=40&md5=1a10c9190026bf016b66e5be9ab2e494	Department of Animal Science, Colorado State University, 1171 Campus Delivery, Fort Collins, 80523, CO, United States	Davis M.K., Department of Animal Science, Colorado State University, 1171 Campus Delivery, Fort Collins, 80523, CO, United States; Engle T.E., Department of Animal Science, Colorado State University, 1171 Campus Delivery, Fort Collins, 80523, CO, United States; Cadaret C.N., Department of Animal Science, Colorado State University, 1171 Campus Delivery, Fort Collins, 80523, CO, United States; Cram…	During lairage at slaughter plants, cattle can be exposed to extreme heat conditions from pen densities and holding pen microclimates. While research outlining heat mitigation strategies used in other sectors of the beef supply chain is available, there is no published data on the use of heat mitigation strategies at slaughter plants. The objective of this study was to characterize short-term hea…	animal welfare; beef cattle; cattle processors; heat mitigation; shade; sprinklers	English	Article	Final	All Open Access; Gold Open Access	Scopus	2-s2.0-85125197120
	Oliveira F.C.; Ferreira C.E.R.; Haas C.S.; Oliveira L.G.; Mondadori R.G.; Schneider A.; Rovani M.T.; Gonçalves P.B.D.; Vieira A.D.; Gasperin B.G.; Lucia T., Jr.	56531490700; 56799813800; 56915319900; 57192264594; 6506780599; 24554181800; 57792456800; 7102981214; 7103040367; 12806835200; 6603604082	Chemical castration in cattle with intratesticular injection of sodium chloride: Effects on stress and inflammatory markers	no slaughter context	2017	Theriogenology	90			114	119	5	10.1016/j.theriogenology.2016.12.001	8	https://www.scopus.com/inward/record.uri?eid=2-s2.0-85002548515&doi=10.1016%2fj.theriogenology.2016.12.001&partnerID=40&md5=5b2d4cec36f610df93b8700d5b737c7d	ReproPel, Universidade Federal de Pelotas, Pelotas, 96010-900, RS, Brazil; Faculdade de Veterinária, Universidade Federal de Pelotas, Pelotas, 96010-900, RS, Brazil; Instituto de Biologia, Universidade Federal de Pelotas, Pelotas, 96010-900, RS, Brazil; Faculdade de Nutrição, Universidade Federal de Pelotas, Pelotas, 96010-900, RS, Brazil; Biorep, Centro de Ciências Rurais, Universidade Federal d…	Oliveira F.C., ReproPel, Universidade Federal de Pelotas, Pelotas, 96010-900, RS, Brazil, Faculdade de Veterinária, Universidade Federal de Pelotas, Pelotas, 96010-900, RS, Brazil; Ferreira C.E.R., ReproPel, Universidade Federal de Pelotas, Pelotas, 96010-900, RS, Brazil, Faculdade de Veterinária, Universidade Federal de Pelotas, Pelotas, 96010-900, RS, Brazil; Haas C.S., ReproPel, Universidade F…	Intratesticular injection (ITI) of sodium chloride (NaCl) is efficient for chemical castration of young calves, but its effects on calves welfare are unknown. Two experiments were conducted to evaluate the effects of ITI of 20% NaCl on stress and inflammatory markers in calves less than 20 days old and to assess the efficiency of ITI of 30% NaCl in 5 months old calves. In Experiment 1, control ca…	Calves; Chemical castration; Cortisol; PON1; Thermography; Welfare	English	Article	Final		Scopus	2-s2.0-85002548515
	Hampton J.O.; Skroblin A.; De Ridder T.R.; Perry A.L.	7202738924; 36651772000; 57192063502; 56326271400	Chemical immobilisation and rangeland species: Assessment of a helicopter darting method for Australian cattle	no slaughter context	2016	Rangeland Journal	38	6		533	540	7	10.1071/RJ16079	3	https://www.scopus.com/inward/record.uri?eid=2-s2.0-85006377274&doi=10.1071%2fRJ16079&partnerID=40&md5=a79a839d0cee68d264b031e0c10ceba4	Murdoch University, 90 South Street, Murdoch, 6150, WA, Australia; Ecotone Wildlife Veterinary Services, PO Box 76, Inverloch, 3996, VIC, Australia; Australian Wildlife Conservancy, Mornington Wildlife Sanctuary, PMB 925, Derby, 6728, WA, Australia; Australian Government Department of Agriculture and Water Resources, Airport Administration Centre, PO Box 96, Cairns, 4870, QLD, Australia; Livestoc…	Hampton J.O., Murdoch University, 90 South Street, Murdoch, 6150, WA, Australia, Ecotone Wildlife Veterinary Services, PO Box 76, Inverloch, 3996, VIC, Australia; Skroblin A., Australian Wildlife Conservancy, Mornington Wildlife Sanctuary, PMB 925, Derby, 6728, WA, Australia, School of Biosciences, University of Melbourne, Parkville, 3010, VIC, Australia; De Ridder T.R., Australian Government Dep…	Chemical immobilisation (darting) is increasingly being used for the capture of rangeland animals. The aim of the present study was to assess a newly developed helicopter-based chemical immobilisation method for free-ranging Australian rangeland cattle (Bos taurus and Bos indicus). Eighteen cattle were darted from a helicopter in north-Western Australia in September 2015 using a combination of xy…	arid rangelands; domestic animal production; rangeland management	English	Article	Final		Scopus	2-s2.0-85006377274
	Luengos Vidal E.M.; Castillo D.F.; Baglioni J.; Manfredi C.; Lucherini M.; Casanave E.B.	6504123366; 26647377800; 36997141400; 7005896823; 6603793154; 6602856762	Chemical immobilisation of free-ranging Pampas foxes (Pseudalopex gymnocercus): Assessment of ketamine-xylazine and tiletamine-zolazepam combinations	no slaughter context	2014	Research in Veterinary Science	96	2		371	376	5	10.1016/j.rvsc.2013.12.016	4	https://www.scopus.com/inward/record.uri?eid=2-s2.0-84896473005&doi=10.1016%2fj.rvsc.2013.12.016&partnerID=40&md5=1011eea2f78ca4e6c24cfa49ae1f6978	Grupo de Ecología Comportamental de Mamíferos, Catedra de Fisiología Animal, Departamento de Biología, Bioquímica y Farmacia, Universidad Nacional del Sur, Argentina; Consejo Nacional de Investigaciones Científicas y Técnicas (CONICET), Argentina	Luengos Vidal E.M., Grupo de Ecología Comportamental de Mamíferos, Catedra de Fisiología Animal, Departamento de Biología, Bioquímica y Farmacia, Universidad Nacional del Sur, Argentina, Consejo Nacional de Investigaciones Científicas y Técnicas (CONICET), Argentina; Castillo D.F., Grupo de Ecología Comportamental de Mamíferos, Catedra de Fisiología Animal, Departamento de Biología, Bioquímica y …	Two protocols to immobilise free-ranging Pampas foxes for ear-tagging or radio-collaring were evaluated. One hundred fifteen foxes were injected with ketamine-xylazine (K-X) and thirteen with tiletamine-zolazepam (T-Z). The use of both T-Z and K-X combinations typically resulted in a smooth induction and recovery. In 86% of the cases K-X protocol was judged effective (mean. ±. SD, K: 10.7. ±. 3.3…	Chemical restraint; Grassland; Hyperthermia; Hypothermia; Ketamine-xylazine; Tiletamine-zolazepam	English	Article	Final		Scopus	2-s2.0-84896473005
	Carnovale F.; Jin X.; Arney D.; Descovich K.; Guo W.; Shi B.; Phillips C.J.C.	57216493576; 57194025468; 6602629594; 36918092600; 57222387539; 8729445400; 57216214020	Chinese public attitudes towards, and knowledge of, animal welfare	no slaughter context	2021	Animals	11	3	855	1	27	26	10.3390/ani11030855	15	https://www.scopus.com/inward/record.uri?eid=2-s2.0-85102599488&doi=10.3390%2fani11030855&partnerID=40&md5=0c5d73abbc40647757948249b4beed22	College of Animal Science, Inner Mongolia Agricultural University, 306 Zhaowuda Road, Inner Mongolia, Hohhot, 010018, China; Institute of Veterinary Medicine and Animal Sciences, Estonian University of Life Sciences, Kreutzwaldi 1, Tartu, 51014, Estonia; School of Veterinary Science, University of Queensland, Gatton, 4343, QLD, Australia; Curtin University Sustainability Policy (CUSP) Institute, …	Carnovale F., College of Animal Science, Inner Mongolia Agricultural University, 306 Zhaowuda Road, Inner Mongolia, Hohhot, 010018, China, Institute of Veterinary Medicine and Animal Sciences, Estonian University of Life Sciences, Kreutzwaldi 1, Tartu, 51014, Estonia, School of Veterinary Science, University of Queensland, Gatton, 4343, QLD, Australia; Jin X., College of Animal Science, Inner Mon…	Food‐producing animals make up the majority of animals that humans manage globally, and China has been a major producer and exporter of animal products since the late 1990s. The opinions of the population in China regarding animal welfare are not as well understood as those in Europe. In China, animal welfare as a societal concern is still at an early stage of development. This survey of Chinese …	Animal welfare; Animals; Attitudes; China; Europe; Knowledge; Livestock; Management	English	Article	Final	All Open Access; Gold Open Access	Scopus	2-s2.0-85102599488
	Tecles F.; Escribano D.; Martínez-Miró S.; Hernández F.; Contreras M.D.; Cerón J.J.	6603311242; 53663458500; 57221647327; 7202801405; 57188736373; 7004887203	Cholinesterase in porcine saliva: Analytical characterization and behavior after experimental stress	no slaughter context	2016	Research in Veterinary Science	106			23	28	5	10.1016/j.rvsc.2016.03.006	21	https://www.scopus.com/inward/record.uri?eid=2-s2.0-84962758794&doi=10.1016%2fj.rvsc.2016.03.006&partnerID=40&md5=a533b98c939ef2e893f24d59f522fab9	Interdisciplinary Laboratory of Clinical Analysis (Interlab-UMU), University of Murcia, Campus of Excellence Mare Nostrum, Espinardo, Murcia, 30100, Spain; Animal Production Department, University of Murcia, Campus of Excellence Mare Nostrum, Espinardo, Murcia, 30100, Spain	Tecles F., Interdisciplinary Laboratory of Clinical Analysis (Interlab-UMU), University of Murcia, Campus of Excellence Mare Nostrum, Espinardo, Murcia, 30100, Spain; Escribano D., Interdisciplinary Laboratory of Clinical Analysis (Interlab-UMU), University of Murcia, Campus of Excellence Mare Nostrum, Espinardo, Murcia, 30100, Spain; Martínez-Miró S., Animal Production Department, University of …	The purpose of this study was to measure and characterize the enzyme cholinesterase (ChE) in porcine saliva, as well as to evaluate its behavior in experimental stressful conditions. The results of ChE characterization by using different substrates and the selective inhibitors ethopropazine and physostigmine showed that the main enzyme existing in porcine saliva was butyrylcholinesterase (BChE). …	Cholinesterase; Inhibitors; Pigs; Saliva; Stress; Substrates	English	Article	Final		Scopus	2-s2.0-84962758794
	Verheyen, F.; Racz, R.; Borgers, M.; Driesen, R. B.; Lenders, M. -H.; Flameng, W. J.		Chronic hibernating myocardium in sheep can occur without degenerating events and is reversed after revascularization	no slaughter context	2014	CARDIOVASCULAR PATHOLOGY	23	3		160	168		10.1016/j.carpath.2014.01.003					Introduction: Our goal was to show that blunting of myocardial flow reserve is mainly involved in adaptive chronic myocardial hibernation without apparent cardiomyocyte degeneration.Methods and results: Sheep chronically instrumented with critical multivessel stenosis and/or percutaneous transluminal coronary angioplasty (PTCA)-induced revascularization were allowed to run and feed in the open fo…			Article			WOS
	Nazar F.N.; Marin R.H.	24576850500; 7101784701	Chronic stress and environmental enrichment as opposite factors affecting the immune response in Japanese quail (Coturnix coturnix japonica)	no slaughter context	2011	Stress	14	2		166	173	7	10.3109/10253890.2010.523093	48	https://www.scopus.com/inward/record.uri?eid=2-s2.0-79551645011&doi=10.3109%2f10253890.2010.523093&partnerID=40&md5=057a9ac44e410ac9e6e4158f5db9104b	Facultad de Ciencias Exactas, Físicas y Naturales, Instituto de Ciencia y Tecnología de Los Alimentos (ICTA), Universidad Nacional de Córdoba, 5016 Córdoba, Argentina	Nazar F.N., Facultad de Ciencias Exactas, Físicas y Naturales, Instituto de Ciencia y Tecnología de Los Alimentos (ICTA), Universidad Nacional de Córdoba, 5016 Córdoba, Argentina; Marin R.H., Facultad de Ciencias Exactas, Físicas y Naturales, Instituto de Ciencia y Tecnología de Los Alimentos (ICTA), Universidad Nacional de Córdoba, 5016 Córdoba, Argentina	Procedures in the commercial production of animals involve stressful situations which lessen the animal's welfare. This study on Japanese quail evaluated whether an environmental enrichment manipulation can affect avian immune responses and if combined with a chronic stressor exposure can help to counteract the negative effects of stress on the immune system. Potential gender effects were also co…	Antibody response; chronic stress; environmental enrichment; heterophil/lymphocyte ratio; immune response; Japanese quail	English	Article	Final		Scopus	2-s2.0-79551645011
	Briefer E.F.; Sypherd C.C.-R.; Linhart P.; Leliveld L.M.C.; Padilla de la Torre M.; Read E.R.; Guérin C.; Deiss V.; Monestier C.; Rasmussen J.H.; Špinka M.; Düpjan S.; Boissy A.; Janczak A.M.; Hillmann E.; Tallet C.	23969897100; 57483122000; 24335935500; 24831822300; 25226338400; 57483155100; 36611422300; 24733981100; 57483090100; 56982404100; 6701817104; 15843259000; 56264571300; 6603465993; 6603435588; 8533478000	Classification of pig calls produced from birth to slaughter according to their emotional valence and context of production	no slaughter context	2022	Scientific Reports	12	1	3409				10.1038/s41598-022-07174-8	7	https://www.scopus.com/inward/record.uri?eid=2-s2.0-85126079708&doi=10.1038%2fs41598-022-07174-8&partnerID=40&md5=6e42e03f54aa0e91a5798351fd1bf868	Institute of Agricultural Sciences, ETH Zurich, Universitätsstrasse 2, Zürich, 8092, Switzerland; Behavioural Ecology Group, Section for Ecology and Evolution, Department of Biology, University of Copenhagen, Copenhagen, 2100, Denmark; Department of Ethology, Institute of Animal Science, Prague, 104 01, Czech Republic; Department of Zoology, Faculty of Science, University of South Bohemia, Č. Bud…	Briefer E.F., Institute of Agricultural Sciences, ETH Zurich, Universitätsstrasse 2, Zürich, 8092, Switzerland, Behavioural Ecology Group, Section for Ecology and Evolution, Department of Biology, University of Copenhagen, Copenhagen, 2100, Denmark; Sypherd C.C.-R., Behavioural Ecology Group, Section for Ecology and Evolution, Department of Biology, University of Copenhagen, Copenhagen, 2100, Den…	Vocal expression of emotions has been observed across species and could provide a non-invasive and reliable means to assess animal emotions. We investigated if pig vocal indicators of emotions revealed in previous studies are valid across call types and contexts, and could potentially be used to develop an automated emotion monitoring tool. We performed an analysis of an extensive and unique data…		English	Article	Final	All Open Access; Gold Open Access; Green Open Access	Scopus	2-s2.0-85126079708
	Bautista-Fernández M.; Estévez-Moreno L.X.; Losada-Espinosa N.; Villarroel M.; María G.A.; De Blas I.; Miranda-de la Lama G.C.	57222494652; 57192265599; 56400984600; 7003443916; 7006219583; 14035311500; 57226721051	Claw disorders as iceberg indicators of cattle welfare: Evidence-based on production system, severity, and associations with final muscle pH	no slaughter context	2021	Meat Science	177		108496				10.1016/j.meatsci.2021.108496	3	https://www.scopus.com/inward/record.uri?eid=2-s2.0-85102865795&doi=10.1016%2fj.meatsci.2021.108496&partnerID=40&md5=562d576d8d7f21e23a1d9737011f4486	Faculty of Veterinary Medicine, National Autonomous University of Mexico, UNAM, Mexico; Department of Animal Production and Food Science, Faculty of Veterinary Medicine, University of Zaragoza, Zaragoza, Spain; Department of Food Science, Metropolitan Autonomous University, UAM, Lerma, State of Mexico, Mexico; CEIGRAM, ETSIAAB, Technical University of Madrid (UPM), Madrid, Spain; Department of An…	Bautista-Fernández M., Faculty of Veterinary Medicine, National Autonomous University of Mexico, UNAM, Mexico; Estévez-Moreno L.X., Department of Animal Production and Food Science, Faculty of Veterinary Medicine, University of Zaragoza, Zaragoza, Spain; Losada-Espinosa N., Faculty of Veterinary Medicine, National Autonomous University of Mexico, UNAM, Mexico; Villarroel M., CEIGRAM, ETSIAAB, Tec…	This study presents a novel approach to use claw disorders in cattle as a retrospective welfare indicator characterized at the abattoir. A total of 1040 cattle (2080 front and back left claws) were analyzed from 143 batches, originating from feedlots, free-range, and dairy systems. Our results indicate that abnormal claw shapes (>55%) and fissures of the claw wall (>25%) had the highest prevalenc…	Cattle welfare; Claw disorders; Iceberg indicators; Meat quality; Post-mortem assessment	English	Article	Final	All Open Access; Hybrid Gold Open Access	Scopus	2-s2.0-85102865795
	Dzieciolowski T.; Boqvist S.; Rydén J.; Hansson I.	57346984500; 55991381900; 7004686046; 12780389600	Cleaning and disinfection of transport crates for poultry – comparison of four treatments at slaughter plant	no slaughter context	2022	Poultry Science	101	1	101521				10.1016/j.psj.2021.101521	2	https://www.scopus.com/inward/record.uri?eid=2-s2.0-85119425595&doi=10.1016%2fj.psj.2021.101521&partnerID=40&md5=758e545c6b0e1b5a3c6aa6042a51be78	Department of Biomedical Sciences and Veterinary Public Health, Swedish University of Agricultural Sciences, Uppsala, SE-750 07, Sweden; Department of Energy and Technology, Swedish University of Agricultural Sciences, Uppsala, SE-750 07, Sweden	Dzieciolowski T., Department of Biomedical Sciences and Veterinary Public Health, Swedish University of Agricultural Sciences, Uppsala, SE-750 07, Sweden; Boqvist S., Department of Biomedical Sciences and Veterinary Public Health, Swedish University of Agricultural Sciences, Uppsala, SE-750 07, Sweden; Rydén J., Department of Energy and Technology, Swedish University of Agricultural Sciences, Upp…	Transport crates for poultry can contribute to the spread of pathogens, with those of public health interest, for example, Campylobacter, being of particular importance. A strict cleaning procedure and use of an effective disinfection method for transport equipment are thus important to avoid introduction of Campylobacter to chicken and poultry farms, particularly during flock thinning. This stud…	Campylobacter; cleaning; disinfection; poultry; transport crate	English	Article	Final	All Open Access; Gold Open Access; Green Open Access	Scopus	2-s2.0-85119425595
	Herskin M.S.; Holm C.; Thodberg K.	6701544023; 57216974634; 6603234887	Clinical and behavioural consequences of on-farm mixing of cull sows after weaning	no slaughter context	2020	Applied Animal Behaviour Science	228		105028				10.1016/j.applanim.2020.105028	3	https://www.scopus.com/inward/record.uri?eid=2-s2.0-85085623358&doi=10.1016%2fj.applanim.2020.105028&partnerID=40&md5=94ca170a106058a2ecc7a2cc464bf5ed	Department of Animal Science, Aarhus University, AU-FOULUM, PO Box 50, Tjele, DK-8830, Denmark	Herskin M.S., Department of Animal Science, Aarhus University, AU-FOULUM, PO Box 50, Tjele, DK-8830, Denmark; Holm C., Department of Animal Science, Aarhus University, AU-FOULUM, PO Box 50, Tjele, DK-8830, Denmark; Thodberg K., Department of Animal Science, Aarhus University, AU-FOULUM, PO Box 50, Tjele, DK-8830, Denmark	In modern pig production up to 50% of the sows are slaughtered each year. Typically, the period from the decision to cull and until a sow is slaughtered consists of a stay in an on-farm pick-up pen (hours to weeks), transport (eventually passing buying stations or similar) and lairage. However, even though cull sows are often mentioned as vulnerable toward challenges such as transport, the behavi…	Aggression; Cull sow; Fitness for transport; Mixing; Welfare	English	Article	Final		Scopus	2-s2.0-85085623358
	Bethell E.J.; Holmes A.; MacLarnon A.; Semple S.	8693220200; 8934576200; 6602927073; 35307863500	Cognitive bias in a non-human primate: Husbandry procedures influence cognitive indicators of psychological well-being in captive rhesus macaques	no slaughter context	2012	Animal Welfare	21	2		185	195	10	10.7120/09627286.21.2.185	69	https://www.scopus.com/inward/record.uri?eid=2-s2.0-84860121743&doi=10.7120%2f09627286.21.2.185&partnerID=40&md5=3cf1a47797ee81450081c246430d8504	School of Natural Sciences and Psychology, James Parsons Building, Liverpool John Moores University, Liverpool L3 3AF, Byrom Street, United Kingdom; Department of Life Sciences, University of Roehampton, London SW15 4JD, United Kingdom; Department of Psychology, University of Roehampton, London SW15 4JD, United Kingdom	Bethell E.J., School of Natural Sciences and Psychology, James Parsons Building, Liverpool John Moores University, Liverpool L3 3AF, Byrom Street, United Kingdom, Department of Life Sciences, University of Roehampton, London SW15 4JD, United Kingdom; Holmes A., Department of Psychology, University of Roehampton, London SW15 4JD, United Kingdom; MacLarnon A., Department of Life Sciences, Universit…	The measurement of 'cognitive bias' has recently emerged as a powerful tool for assessing animal welfare. Cognitive bias was initially, and widely, studied in humans, and describes the way in which particular emotions are associated with biases in information processing. People suffering from clinical levels of anxiety or depression, for example, interpret ambiguous events more negatively than do…	Animal welfare; Capture; Emotion; Enrichment; Husbandry procedures; Rhesus macaque	English	Article	Final	All Open Access; Green Open Access	Scopus	2-s2.0-84860121743
	Čobanović N.; Jamnikar-Ciglenečki U.; Kirbiš A.; Križman M.; Štukelj M.; Vićić I.; Karabasil N.	57190274375; 23097708000; 57213854892; 56013298800; 24077240500; 57211628557; 57218216272	Coherence of clinical symptoms at antemortem inspection and pathological lesions at postmortem inspection in slaughter pigs; [Domuzlarda antemortem muayenedeki klinik bulgular ile postmortem muayenede belirlenen patolojik lezyonların tutarlılığı]	no slaughter context	2020	Kafkas Universitesi Veteriner Fakultesi Dergisi	26	4	KVFD-2020-23884	533	539	6	10.9775/kvfd.2020.23884	3	https://www.scopus.com/inward/record.uri?eid=2-s2.0-85085492085&doi=10.9775%2fkvfd.2020.23884&partnerID=40&md5=0136fa468345ec7a77ba09901d63d680	University of Belgrade, Faculty of Veterinary Medicine, Department of Food Hygiene and Technology, Bulevar Oslobodjenja 18, Belgrade, 11000, Serbia; University of Ljubljana, Veterinary Faculty, Institute of Food safety, Feed and Environment, Gerbičeva 60, Ljubljana, 1000, Slovenia; University of Ljubljana, Veterinary Faculty, Clinic for Ruminants and Pigs, Clinic for Reproduction and Farm Animals…	Čobanović N., University of Belgrade, Faculty of Veterinary Medicine, Department of Food Hygiene and Technology, Bulevar Oslobodjenja 18, Belgrade, 11000, Serbia; Jamnikar-Ciglenečki U., University of Ljubljana, Veterinary Faculty, Institute of Food safety, Feed and Environment, Gerbičeva 60, Ljubljana, 1000, Slovenia; Kirbiš A., University of Ljubljana, Veterinary Faculty, Institute of Food safe…	The aim of this study was to examine the relationship between clinical symptoms recorded during the antemortem inspection in the lairage and pathological lesions at postmortem inspection of slaughter pigs. If clinical symptoms were an accurate indicator of pathological lesions at postmortem inspection it could be possible to incorporate only those parameters in the health and welfare monitoring s…	Coughing; Liver milk spots; Lung lesions; Receiver operating characteristic analysis; Sneezing	English	Article	Final	All Open Access; Bronze Open Access; Green Open Access	Scopus	2-s2.0-85085492085
	Toledo-Guedes K.; Ulvan E.M.; Uglem I.	25823975900; 43961694200; 6506775055	Commercial gillnetting is more stressful for saithe (Pollachius virens L.) than jigging: But is fillet quality affected?	no slaughter context	2016	Aquatic Living Resources	29	2	203				10.1051/alr/2016013	2	https://www.scopus.com/inward/record.uri?eid=2-s2.0-84974530638&doi=10.1051%2falr%2f2016013&partnerID=40&md5=48329bee7167386fcef4cd2595ac87f0	Norwegian Institute of Nature Research, PO Box 5685 Sluppen, Trondheim, 7485, Norway; Dept. of Marine Sciences and Applied Biology, University of Alicante, PO Box 99, Alicante, 03080, Spain	Toledo-Guedes K., Norwegian Institute of Nature Research, PO Box 5685 Sluppen, Trondheim, 7485, Norway, Dept. of Marine Sciences and Applied Biology, University of Alicante, PO Box 99, Alicante, 03080, Spain; Ulvan E.M., Norwegian Institute of Nature Research, PO Box 5685 Sluppen, Trondheim, 7485, Norway; Uglem I., Norwegian Institute of Nature Research, PO Box 5685 Sluppen, Trondheim, 7485, Norw…	Various fish capture methods, which involve different levels of pre-slaughter stress/welfare, could influence the final quality of marketed fish. In this study, living saithe (Pollachius virens L.), caught during realistic commercial fishing by gillnetting (n = 37) and automatic jigging (n = 50), were analysed for stress indicators in blood parameters. An assessment of the fillet quality of the s…	Blood parameters; Catching method; Quality indexes; Saithe; Stress; Welfare	English	Article	Final	All Open Access; Bronze Open Access; Green Open Access	Scopus	2-s2.0-84974530638
	Grigg E.K.; Ueda Y.; Walker A.L.; Hart L.A.; Simas S.; Stern J.A.	6602589756; 36138154300; 57208274364; 7201500423; 57350296900; 23091969700	Comparative Assessment of Heart Rate Variability Obtained via Ambulatory ECG and Polar Heart Rate Monitors in Healthy Cats: A Pilot Study	no slaughter context	2021	Frontiers in Veterinary Science	8		741583				10.3389/fvets.2021.741583	1	https://www.scopus.com/inward/record.uri?eid=2-s2.0-85119686473&doi=10.3389%2ffvets.2021.741583&partnerID=40&md5=243a8f43fe3adb0873c17c93fcf25019	Department of Population Health and Reproduction, School of Veterinary Medicine, University of California, Davis, Davis, CA, United States; Department of Clinical Sciences, College of Veterinary Medicine, North Carolina State University, Raleigh, NC, United States; Department of Medicine and Epidemiology, School of Veterinary Medicine, University of California, Davis, Davis, CA, United States; De…	Grigg E.K., Department of Population Health and Reproduction, School of Veterinary Medicine, University of California, Davis, Davis, CA, United States; Ueda Y., Department of Clinical Sciences, College of Veterinary Medicine, North Carolina State University, Raleigh, NC, United States; Walker A.L., Department of Medicine and Epidemiology, School of Veterinary Medicine, University of California, D…	Chronic exposure to stressful environments can negatively impact cats' health and welfare, affecting behavioral, autonomic, endocrine, and immune function, as with cats in shelters. Low-stress handling practices likely improve shelter cat welfare, but data supporting improved outcomes remain limited. Cardiac activity, particularly heart rate variability (HRV), is an indicator of stress and emotio…	cat; heart rate; heart rate variability; Holter monitor; physiological stress measures; Polar H10	English	Article	Final	All Open Access; Gold Open Access; Green Open Access	Scopus	2-s2.0-85119686473
	Mallien A.S.; Pfeiffer N.; Brandwein C.; Inta D.; Sprengel R.; Palme R.; Talbot S.R.; Gass P.	57028391800; 36117034000; 22936852400; 15725161600; 56271290400; 55119967900; 56513423900; 7006877207	Comparative Severity Assessment of Genetic, Stress-Based, and Pharmacological Mouse Models of Depression	no slaughter context	2022	Frontiers in Behavioral Neuroscience	16		908366				10.3389/fnbeh.2022.908366	4	https://www.scopus.com/inward/record.uri?eid=2-s2.0-85133521731&doi=10.3389%2ffnbeh.2022.908366&partnerID=40&md5=363b58b09007b4db7fb47968c91b9c5d	Research Group (RG) Animal Models in Psychiatry, Department of Psychiatry and Psychotherapy, Medical Faculty Mannheim, Central Institute of Mental Health, Heidelberg University, Heidelberg, Germany; Department for Community Health, Faculty of Natural Sciences and Medicine, University of Fribourg, Fribourg, Switzerland; Max Planck Institute for Medical Research (MPIMF), Heidelberg, Germany; Depart…	Mallien A.S., Research Group (RG) Animal Models in Psychiatry, Department of Psychiatry and Psychotherapy, Medical Faculty Mannheim, Central Institute of Mental Health, Heidelberg University, Heidelberg, Germany; Pfeiffer N., Research Group (RG) Animal Models in Psychiatry, Department of Psychiatry and Psychotherapy, Medical Faculty Mannheim, Central Institute of Mental Health, Heidelberg Univers…	The use of animals in neurosciences is pivotal to gaining insights into complex functions and dysfunctions of behavior. For example, various forms of physical and/or psychological stress are inherent to various animal models for psychiatric disorders, e.g., depression. Regarding animal welfare, it would be mandatory to use models that inflict the least amount of stress necessary to address the un…	3R; depression model; fecal corticosterone metabolites; GluA1 (AMPA receptor subunit GluR1); Laboratory Animal Science; mouse; severity assessment; stress	English	Article	Final	All Open Access; Gold Open Access; Green Open Access	Scopus	2-s2.0-85133521731
	Xu L.; Yu M.; Chen X.	55732563900; 57245783500; 55200939300	Comparative study on consumers’ choice behaviors in selecting pork in rational and irrational scenarios	no slaughter context	2022	Frontiers in Psychology	13		1016933				10.3389/fpsyg.2022.1016933	0	https://www.scopus.com/inward/record.uri?eid=2-s2.0-85140744431&doi=10.3389%2ffpsyg.2022.1016933&partnerID=40&md5=2e8a1f65c512cd84dfacf61e3f60b598	Institute for Food Safety Risk Management, School of Business, Jiangnan University, Wuxi, China; School of Business, Jiangnan University, Wuxi, China	Xu L., Institute for Food Safety Risk Management, School of Business, Jiangnan University, Wuxi, China; Yu M., School of Business, Jiangnan University, Wuxi, China; Chen X., Institute for Food Safety Risk Management, School of Business, Jiangnan University, Wuxi, China	To better understand the purchasing decision-making process of humane pork, and examine the internal relationship between consumers’ preferences in rational consumption and irrational decoy scenarios, 405 consumers in Wuxi City, Jiangsu Province, and China were surveyed. Attributes were set for breeding time, breeding mode, diet cleanliness label, and price, and the first three among them reflect…	animal welfare; attribute preference; decoy effect; food safety; pork hindquarter	English	Article	Final	All Open Access; Gold Open Access	Scopus	2-s2.0-85140744431
	Stiewert A.M.; Wooming B.; Archer G.S.	57215820362; 56200161500; 26642935300	Comparing various euthanasia devices and methods on 8 and 12-week-old turkey hens	no slaughter context	2021	Poultry Science	100	5	101053				10.1016/j.psj.2021.101053	3	https://www.scopus.com/inward/record.uri?eid=2-s2.0-85103133969&doi=10.1016%2fj.psj.2021.101053&partnerID=40&md5=e84ef5b26aab616b7c77cbb01191029e	Department of Poultry Science, Texas A&M University, College Station, 77843, United States; Cargill, Inc., Minneapolis, 55440, MN, United States	Stiewert A.M., Department of Poultry Science, Texas A&M University, College Station, 77843, United States; Wooming B., Cargill, Inc., Minneapolis, 55440, MN, United States; Archer G.S., Department of Poultry Science, Texas A&M University, College Station, 77843, United States	On-farm euthanasia of poultry is a necessity for minimizing disease spread and removing sick or injured birds to maintain optimum animal welfare. There are numerous methods that are approved for euthanasia of poultry by organizations like the American Veterinary Medical Association; however, all approved methods are not easily carried out on-farm or as effective as one another. Therefore, the obj…	captive bolt; cervical dislocation; euthanasia; turkey	English	Article	Final	All Open Access; Gold Open Access	Scopus	2-s2.0-85103133969
	Pittavino, M.; Dreyfus, A.; Heuer, C.; Benschop, J.; Wilson, P.; Collins-Emerson, J.; Torgerson, P. R.; Furrer, R.		Comparison between generalized linear modelling and additive Bayesian network; identification of factors associated with the incidence of antibodies against Leptospira interrogans sv Pomona in meat workers in New Zealand	no slaughter context	2017	ACTA TROPICA	173			191	199		10.1016/j.actatropica.2017.04.034					Background: Additive Bayesian Network (ABN) is a graphical model which extends Generalized Linear Modelling (GLM) to multiple dependent variables. The present study compares results from GLM with those from ABN analysis used to identify factors associated with Leptospira interrogans sv Pomona (Pomona) infection by exploring the advantages and disadvantages of these two methodologies, to corrobora…			Article			WOS
	Seman M.; Gregova G.; Korim P.	57221197912; 55173918500; 7801591033	Comparison of Campylobacter spp. and flock health indicators of broilers in Iceland	no slaughter context	2020	Annals of Agricultural and Environmental Medicine	27	4		579	584	5	10.26444/aaem/127181	2	https://www.scopus.com/inward/record.uri?eid=2-s2.0-85098479010&doi=10.26444%2faaem%2f127181&partnerID=40&md5=3bf2ed0d98b07eea9a05c6eb4c3c9f85	University of Veterinary Medicine and Pharmacy, Košice, 04181, Slovakia; Icelandic Food and Veterinary Authority (MAST), Iceland	Seman M., University of Veterinary Medicine and Pharmacy, Košice, 04181, Slovakia, Icelandic Food and Veterinary Authority (MAST), Iceland; Gregova G., University of Veterinary Medicine and Pharmacy, Košice, 04181, Slovakia; Korim P., University of Veterinary Medicine and Pharmacy, Košice, 04181, Slovakia	Introduction. The safety of poultry meat products and contamination with microorganisms is based on appropriate reduction of the presence of pathogens during poultry rearing and is closely related to the level of rearing hygiene, including the type of housing, stocking density, microclimate, sanitation and ventilation. Objective. The aim of the study is to evaluate the prevalence of Campylobacter…	Broiler chicken; Campylobacter spp; Welfare indicator	English	Article	Final	All Open Access; Gold Open Access	Scopus	2-s2.0-85098479010
	Tona K.; Onagbesan O.M.; Jego Y.; Kamers B.; Decuypere E.; Bruggeman V.	6701783931; 7003686689; 6507714953; 8272418700; 56244579600; 7003343099	Comparison of embryo physiological parameters during incubation, chick quality, and growth performance of three lines of broiler breeders differing in genetic composition and growth rate	no slaughter context	2004	Poultry Science	83	3		507	513	6	10.1093/ps/83.3.507	92	https://www.scopus.com/inward/record.uri?eid=2-s2.0-3042686706&doi=10.1093%2fps%2f83.3.507&partnerID=40&md5=1d73085f32cdb4bfd86e812628d0f220	Lab. Physiol. Immunol. Dom. Animals, Department of Animal Production, K.U. Leuven, B-3001 Leuven, Kasteelpark Arenberg 30, Belgium; Hubbard Europe, 22800 Quintin, France	Tona K., Lab. Physiol. Immunol. Dom. Animals, Department of Animal Production, K.U. Leuven, B-3001 Leuven, Kasteelpark Arenberg 30, Belgium; Onagbesan O.M., Lab. Physiol. Immunol. Dom. Animals, Department of Animal Production, K.U. Leuven, B-3001 Leuven, Kasteelpark Arenberg 30, Belgium; Jego Y., Hubbard Europe, 22800 Quintin, France; Kamers B., Lab. Physiol. Immunol. Dom. Animals, Department of …	In broiler breeder management, stringent feed restriction is practiced to reduce body size in order to improve egg production and meet broiler production demand, but this practice has raised welfare issues. The potential for the dwarfing (dw) gene to reduce feed intake and body size of breeders under ad libitum feeding or less stringent restriction while maintaining improved egg production has be…	Chick quality; Embryo; Growth; Incubation parameter; Line effect	English	Article	Final	All Open Access; Hybrid Gold Open Access	Scopus	2-s2.0-3042686706
	Velazco O.R.B.; Sanz S.C.; Barber F.E.; García A.V.	26022821700; 26022868800; 55803690500; 26533626100	Comparison of extensive and intensive pig production systems in Uruguay in terms of ethologic, physiologic and meat quality parameters	no slaughter context	2013	Revista Brasileira de Zootecnia	42	7		521	529	8	10.1590/S1516-35982013000700009	9	https://www.scopus.com/inward/record.uri?eid=2-s2.0-84880721012&doi=10.1590%2fS1516-35982013000700009&partnerID=40&md5=23b9585b3c961bffe0e69a610b748677	Instituto Nacional de Investigación Agropecuaria (INIA), Estación Experimental Las Brujas, Uruguay; Instituto de Ciencia Animal y Tecnología, Universitat Politécnica de Valéncia, Spain; Centro de Investigación y Tecnología Animal (CITA-IVIA), Valéncia, Spain	Velazco O.R.B., Instituto Nacional de Investigación Agropecuaria (INIA), Estación Experimental Las Brujas, Uruguay; Sanz S.C., Instituto de Ciencia Animal y Tecnología, Universitat Politécnica de Valéncia, Spain; Barber F.E., Instituto de Ciencia Animal y Tecnología, Universitat Politécnica de Valéncia, Spain; García A.V., Centro de Investigación y Tecnología Animal (CITA-IVIA), Valéncia, Spain	The objective of this work is to characterize two contrasting systems of fattening pigs in Uruguay. A total of 96 pigs (average 41.7 kg) were divided into eight groups of 12 animals, representing two production systems: (IN) pigs confined in pens of 12 m2 or (OUT) kept in plots with field shelters and access to pasture. Behavioral observations were performed by scan sampling at 5-minute intervals…	Aggressions; Behaviour; Housed pig; Outdoor pig; Pasture	English	Article	Final	All Open Access; Gold Open Access; Green Open Access	Scopus	2-s2.0-84880721012
	Özhan N.; Şimşek Ü.G.; Özçelik M.	56638429800; 22958955000; 6603912549	Comparison of floor and cage housing systems in terms of some welfare assessments in broiler; [Yer ve kafes sistemlerinin etlik piliçlerde bazı refah parametreleri bakımından karşılaştırılması]	no slaughter context	2016	Ankara Universitesi Veteriner Fakultesi Dergisi	63	3		317	322	5	10.1501/Vetfak_0000002746	10	https://www.scopus.com/inward/record.uri?eid=2-s2.0-84966659182&doi=10.1501%2fVetfak_0000002746&partnerID=40&md5=094635f564279fe1f34d3f418d854cb7	Fırat University, Faculty of Veterinary Medicine, Animal Science Department, Turkey; Fırat University, Health Services High School, Biochemistry, Elazığ, Turkey	Özhan N., Fırat University, Faculty of Veterinary Medicine, Animal Science Department, Turkey; Şimşek Ü.G., Fırat University, Faculty of Veterinary Medicine, Animal Science Department, Turkey; Özçelik M., Fırat University, Health Services High School, Biochemistry, Elazığ, Turkey	This study was conducted to investigate simultaneously compare floor with cage housing systems in terms of some blood parameters, bone quality and pH level of Musculus pectoralis in broilers. The animal material of the study was consisted of a total of 30 broilers per housing system, having stable live weight, were selected on 32nd day of growing period. All broilers per system were choosen at si…	Broiler; Cage housing; Floor housing; Welfare	English	Article	Final	All Open Access; Green Open Access	Scopus	2-s2.0-84966659182
	Kells N.J.; Beausoleil N.J.; Johnson C.B.; Sutherland M.A.; Morrison R.S.; Roe W.	56177787300; 8516314700; 57201324779; 13005366700; 57190675196; 7003673683	Comparison of neural histomorphology in tail tips from pigs docked using clippers or cautery iron	no slaughter context	2017	Animal	11	7		1222	1227	5	10.1017/S1751731116002500	8	https://www.scopus.com/inward/record.uri?eid=2-s2.0-85000788266&doi=10.1017%2fS1751731116002500&partnerID=40&md5=c955203075faa3c2afdfb10d6956f5c0	Animal Welfare Science and Bioethics Centre, Institute of Veterinary, Animal and Biomedical Sciences, Massey University, Private Bag 11222, Palmerston North, 4442, New Zealand; AgResearch Ltd, Ruakura Research Centre, Hamilton, 3214, New Zealand; Rivalea Australia, Corowa, 2646, NSW, Australia; Pathobiology Department, Institute of Veterinary, Animal and Biomedical Sciences, Massey University, Pr…	Kells N.J., Animal Welfare Science and Bioethics Centre, Institute of Veterinary, Animal and Biomedical Sciences, Massey University, Private Bag 11222, Palmerston North, 4442, New Zealand; Beausoleil N.J., Animal Welfare Science and Bioethics Centre, Institute of Veterinary, Animal and Biomedical Sciences, Massey University, Private Bag 11222, Palmerston North, 4442, New Zealand; Johnson C.B., An…	Tail docking of pigs is commonly performed to reduce the incidence of unwanted tail-biting behaviour. Two docking methods are commonly used: Blunt trauma cutting (i.e. using side clippers), or cutting and concurrent cauterisation using a hot cautery iron. A potential consequence of tail amputation is the development of neuromas at the docking site. Neuromas have been linked to neuropathic pain, w…	neuroma; pain; pig; tail docking; welfare	English	Article	Final	All Open Access; Hybrid Gold Open Access	Scopus	2-s2.0-85000788266
	Nielsen S.S.; Nielsen G.B.; Denwood M.J.; Haugegaard J.; Houe H.	7402454704; 56779622700; 24767762700; 6506502854; 7003467991	Comparison of recording of pericarditis and lung disorders at routine meat inspection with findings at systematic health monitoring in Danish finisher pigs	no slaughter context	2015	Acta Veterinaria Scandinavica	57	1	18				10.1186/s13028-015-0109-z	23	https://www.scopus.com/inward/record.uri?eid=2-s2.0-84939203874&doi=10.1186%2fs13028-015-0109-z&partnerID=40&md5=5cd99e22ef22948fc1ee057963180c27	University of Copenhagen, Department of Large Animal Sciences, Faculty of Health and Medical Sciences, Grønnegårdsvej 8, Frederiksberg C, DK-1870, Denmark; MSD Animal Health, Lautrupbjerg 4, Ballerup, DK-2750, Denmark	Nielsen S.S., University of Copenhagen, Department of Large Animal Sciences, Faculty of Health and Medical Sciences, Grønnegårdsvej 8, Frederiksberg C, DK-1870, Denmark; Nielsen G.B., University of Copenhagen, Department of Large Animal Sciences, Faculty of Health and Medical Sciences, Grønnegårdsvej 8, Frederiksberg C, DK-1870, Denmark, MSD Animal Health, Lautrupbjerg 4, Ballerup, DK-2750, Denma…	Background: The use of secondary data is widespread in a range of surveillance and monitoring applications because of the low cost and high availability associated with this form of data. However, as they are often collected for quite unrelated purposes, they are not necessarily fit for the new purpose that is required of them. Routine meat inspection data were originally collected with the purpo…	Abattoir data; Diagnostic evaluation; Meat inspection recordings; Pericarditis; Pleuritis; Slaughter pigs	English	Article	Final	All Open Access; Gold Open Access; Green Open Access	Scopus	2-s2.0-84939203874
	Bessei W.	6603879315	Comparison of the environmental impact of growing males of a brown layer line and a fast growing broiler line – greenhouse gases, acidification, eutrophication, land and water use; [Vergleich der Umweltauswirkung der Mast von Hähnen einer braunen Legelinie mit einer schnell wachsenden Broilerlinie: Treibhausgase, Versauerung, Eutrophierung, Land-und Wasserverbrauch]	no slaughter context	2022	European Poultry Science	86						10.1399/eps.2022.357	0	https://www.scopus.com/inward/record.uri?eid=2-s2.0-85138499051&doi=10.1399%2feps.2022.357&partnerID=40&md5=4ad2e6a2585e7d2c1a328a18b32a13c5	Institute of Animal Science, University of Hohenheim, Stuttgart, Germany	Bessei W., Institute of Animal Science, University of Hohenheim, Stuttgart, Germany	Killing male chicks of layer lines (MLL) is being debated under animal welfare and ethical aspects. This procedure has been banned in Germany as of January 2022 and other European countries may also consider a ban. It is known that growth and feed conversion rate in layer breeds are inferior to the performance of conventional broilers (CBR). The environmental impact of this production system has …	acidification; Broiler; eutrophication; global warming; greenhouse gases; killing day-old chicks; land use; males of layer lines; water use; welfare	English	Article	Final	All Open Access; Bronze Open Access	Scopus	2-s2.0-85138499051
	Ramis G.; Gómez S.; Pallarés F.J.; Muñoz A.	19235779700; 7102183746; 7003845129; 7401864461	Comparison of the severity of esophagogastric, lung and limb lesions at slaughter in pigs reared under standard and enriched conditions	no slaughter context	2005	Animal Welfare	14	1		27	34	7		18	https://www.scopus.com/inward/record.uri?eid=2-s2.0-13644267275&partnerID=40&md5=f04cfa1fdccebe249cbce641adf018d2	Histology/Pathological Anatomy Dept., Faculty of Veterinary Studies, University of Murcia, Murcia, Spain; Department of Animal Production, Faculty of Veterinary Studies, University of Murcia, Murcia, Spain; Dept. of Research Devmt./Innovation, CEFU S.A., 30840 Alhama de Murcia, Murcia, Spain	Ramis G., Dept. of Research Devmt./Innovation, CEFU S.A., 30840 Alhama de Murcia, Murcia, Spain; Gómez S., Histology/Pathological Anatomy Dept., Faculty of Veterinary Studies, University of Murcia, Murcia, Spain; Pallarés F.J., Histology/Pathological Anatomy Dept., Faculty of Veterinary Studies, University of Murcia, Murcia, Spain; Muñoz A., Department of Animal Production, Faculty of Veterinary …	Two hundred and ten pigs were reared in three groups (according to genotype) under enriched conditions of large open-front sawdust-bedded barns. Eight hundred and twenty pigs were reared under standard conditions of small 15-animal pens in a conventional barn with partially slatted floors and natural ventilation. Production parameters including percentage mortality, feed conversion rate and avera…	Animal welfare; Esophagogastric ulcer; Fattening; Limb lesions; Lung lesions; Pig	English	Article	Final		Scopus	2-s2.0-13644267275
	Moustsen V.A.; Hales J.; Lahrmann H.P.; Weber P.M.; Hansen C.F.	14032038100; 55670766400; 56293122500; 57193026627; 16241294000	Confinement of lactating sows in crates for 4 days after farrowing reduces piglet mortality	no slaughter context	2013	Animal	7	4		648	654	6	10.1017/S1751731112002170	53	https://www.scopus.com/inward/record.uri?eid=2-s2.0-84876915495&doi=10.1017%2fS1751731112002170&partnerID=40&md5=6da645ec8b28e3e6baab9f9a488e5f2d	Pig Research Centre, Danish Agriculture and Food Council, 1609 Copenhagen V, Axeltorv 3, Denmark; Department of Large Animal Sciences, HERD - Centre for Herd-oriented Education, Research and Development, University of Copenhagen, DK-1870 Frederiksberg C, Gronnegårdsvej 2, Denmark	Moustsen V.A., Pig Research Centre, Danish Agriculture and Food Council, 1609 Copenhagen V, Axeltorv 3, Denmark; Hales J., Department of Large Animal Sciences, HERD - Centre for Herd-oriented Education, Research and Development, University of Copenhagen, DK-1870 Frederiksberg C, Gronnegårdsvej 2, Denmark; Lahrmann H.P., Pig Research Centre, Danish Agriculture and Food Council, 1609 Copenhagen V, …	To reduce mortality among suckling piglets, lactating sows are traditionally housed in farrowing crates. Alternatively, lactating sows can be housed in farrowing pens where the sow is loose to ensure more behavioural freedom and consequently a better welfare for the sow, although under commercial conditions, farrowing pens have been associated with increased piglet mortality. Most suckling piglet…	combi-pen; confinement; farrowing crate; loose lactating sows; piglet mortality	English	Article	Final	All Open Access; Green Open Access; Hybrid Gold Open Access	Scopus	2-s2.0-84876915495
	Gesto M.	15026446200	Consistent individual competitive ability in rainbow trout as a proxy for coping style and its lack of correlation with cortisol responsiveness upon acute stress	no slaughter context	2019	Physiology and Behavior	208		112576				10.1016/j.physbeh.2019.112576	8	https://www.scopus.com/inward/record.uri?eid=2-s2.0-85067425534&doi=10.1016%2fj.physbeh.2019.112576&partnerID=40&md5=bd380fcfe1c56508cd147d65f29c212b	Section for Aquaculture, DTU Aqua, Technical University of Denmark, Willemoesvej 2, Hirtshals, 9850, Denmark	Gesto M., Section for Aquaculture, DTU Aqua, Technical University of Denmark, Willemoesvej 2, Hirtshals, 9850, Denmark	For a given fish species, individuals are different in their ability to cope with stressors; each individual has its own set of physiological and behavioral responses to stress (stress-coping style). This individual diversity is of importance when considering the welfare of fish reared in aquaculture facilities. In this study with rainbow trout (Oncorhynchus mykiss) we investigated the link betwe…	Aquaculture; Competition; Fish; Individuality; Welfare	English	Article	Final	All Open Access; Green Open Access	Scopus	2-s2.0-85067425534
	Small, A.; James, C.; James, S.; Davies, R.; Howell, M.; Hutchison, M.; Buncic, S.		Construction, management and cleanliness of red meat abattoir lairages in the UK	no slaughter context	2007	MEAT SCIENCE	75	3		523	532		10.1016/j.meatsci.2006.09.002					A survey of a large number of UK abattoirs was conducted via a questionnaire designed to obtain information on (i) throughput and species slaughtered; (ii) construction materials used; (iii) use and type of bedding and (iv) details of cleaning/sanitation regimes. A representative group of abattoirs were selected on the basis of the responses to the questionnaire, and the lairage at these plants i…			Article			WOS
	Delezie E.; Verbeke W.; De Tavernier J.; Decuypere E.	8669928400; 55899801600; 15020348300; 56244579600	Consumer perception versus scientific evidence about alternatives for manual catching of broilers in Belgium	no slaughter context	2007	Poultry Science	86	2		413	419	6	10.1093/ps/86.2.413	2	https://www.scopus.com/inward/record.uri?eid=2-s2.0-33947499017&doi=10.1093%2fps%2f86.2.413&partnerID=40&md5=735ef8d98469ae8a1ec9c649513440f6	Department of Biosystems, Division Livestock-Nutrition-Quality, University of Leuven, B-3001 Heverlee, Kasteelpark Arenberg 30, Belgium; Faculty of Bioscience Engineering, Department of Agricultural Economics, Ghent University, B-9000 Ghent, Coupure Links 635, Belgium; Faculty of Theology, Research Unit of Theological Ethics, Leuven, University of Leuven, B-3000 Leuven, Sint-Michielsstraat 6, Bel…	Delezie E., Department of Biosystems, Division Livestock-Nutrition-Quality, University of Leuven, B-3001 Heverlee, Kasteelpark Arenberg 30, Belgium; Verbeke W., Faculty of Bioscience Engineering, Department of Agricultural Economics, Ghent University, B-9000 Ghent, Coupure Links 635, Belgium; De Tavernier J., Faculty of Theology, Research Unit of Theological Ethics, Leuven, University of Leuven, …	Commercial broiler chickens are exposed to a number of potential stressors prior to slaughter, including catching, crating, and transportation. To ameliorate animal welfare and prevent product quality loss during these processes, numerous scientific studies have been performed. As a result, different technical innovations have been presented such as mechanical catching instead of manual catching.…	Bottleneck; Catching poultry; Consumer; Perception; Survey	English	Article	Final	All Open Access; Hybrid Gold Open Access	Scopus	2-s2.0-33947499017
	Kiran M.; Nithin Prabhu K.; Paramesha S.C.; Rajshekar T.; Praveen M.P.; Punitkumar C.; Puneetha S.C.; Kumar R.; Rahul Y.; Nagabhushan C.	57200216256; 55198920100; 57202910662; 57202918081; 57213630289; 57202918879; 57202919655; 57225853625; 57202919473; 57202919695	Consumption pattern, consumer attitude and consumer perception on meat quality and safety in Southern India	no slaughter context	2018	International Food Research Journal	25	3		1026	1030	4		5	https://www.scopus.com/inward/record.uri?eid=2-s2.0-85049787744&partnerID=40&md5=b16b54e30b33827e550af9ed2e8e5b36	Veterinary College Bengaluru, KVAFSU, Bidar, Karnataka, India	Kiran M., Veterinary College Bengaluru, KVAFSU, Bidar, Karnataka, India; Nithin Prabhu K., Veterinary College Bengaluru, KVAFSU, Bidar, Karnataka, India; Paramesha S.C., Veterinary College Bengaluru, KVAFSU, Bidar, Karnataka, India; Rajshekar T., Veterinary College Bengaluru, KVAFSU, Bidar, Karnataka, India; Praveen M.P., Veterinary College Bengaluru, KVAFSU, Bidar, Karnataka, India; Punitkumar C…	The present study was carried out to understand the awareness, purchasing behaviour and consumer perception and awareness towards meat and meat products quality, safety, regulation, and poisoning. For this, 260 volunteers from Bengaluru district were selected and were surveyed. The study group comprised of 194 males and 66 females. The educational background of respondents was found to vary betwe…	Animal welfare; Food safety; Frozen meat; Preference; Religious slaughter	English	Article	Final		Scopus	2-s2.0-85049787744
	Flament A.; Delleur V.; Poulipoulis A.; Marlier D.	55146949700; 6507258969; 8149113100; 6603901400	Corticosterone, cortisol, triglycerides, aspartate aminotransferase and uric acid plasma concentrations during foie gras production in male mule ducks (Anas platyrhynchos × Cairina moschata)	no slaughter context	2012	British Poultry Science	53	4		408	413	5	10.1080/00071668.2012.711468	6	https://www.scopus.com/inward/record.uri?eid=2-s2.0-84869456879&doi=10.1080%2f00071668.2012.711468&partnerID=40&md5=4e903e0ce7219c5b4f4c4b127ebe0f60	University of Liège, Faculty of Veterinary Medecine, Department of Clinical Sciences of Companion Animals, Clinic for Birds, Rabbits and Rodents, B4000 Liège, Sart-Tilman, Bât. B42, Belgium	Flament A., University of Liège, Faculty of Veterinary Medecine, Department of Clinical Sciences of Companion Animals, Clinic for Birds, Rabbits and Rodents, B4000 Liège, Sart-Tilman, Bât. B42, Belgium; Delleur V., University of Liège, Faculty of Veterinary Medecine, Department of Clinical Sciences of Companion Animals, Clinic for Birds, Rabbits and Rodents, B4000 Liège, Sart-Tilman, Bât. B42, Be…	1. Corticosterone, cortisol, triglycerides, aspartate aminotransferase (AST) and uric acid (UA) plasma concentration were measured at 8 (7 days after group housing), 12 (after 7 days of force feeding) and 13 weeks of age (at slaughter after 12 days of force feeding), and 45 min after an adrenocorticotrophic hormone (ACTH) stimulation test at 8 weeks of age in 12 male mule ducks in an on-farm expe…		English	Article	Final		Scopus	2-s2.0-84869456879
	Linares M.B.; Bórnez R.; Vergara H.	8652888800; 16237903900; 6701828748	Cortisol and catecholamine levels in lambs: Effects of slaughter weight and type of stunning	no slaughter context	2008	Livestock Science	115	1		53	61	8	10.1016/j.livsci.2007.06.010	27	https://www.scopus.com/inward/record.uri?eid=2-s2.0-41549149691&doi=10.1016%2fj.livsci.2007.06.010&partnerID=40&md5=f4f831c277b6de1cbdbd82eb2d8bc892	Departamento de Ciencia y Tecnología Agroforestal, Escuela Técnica Superior de Ingenieros Agrónomos, 02071 Albacete, Campus Universitario, Spain; Sección de Calidad Alimentaria, Instituto de Desarrollo Regional, 02071 Albacete, Campus Universitario, Spain	Linares M.B., Departamento de Ciencia y Tecnología Agroforestal, Escuela Técnica Superior de Ingenieros Agrónomos, 02071 Albacete, Campus Universitario, Spain, Sección de Calidad Alimentaria, Instituto de Desarrollo Regional, 02071 Albacete, Campus Universitario, Spain; Bórnez R., Departamento de Ciencia y Tecnología Agroforestal, Escuela Técnica Superior de Ingenieros Agrónomos, 02071 Albacete, …	The objectives of this study were (1) to determine the levels of cortisol (C) and catecholamines (adrenaline, A, and noradrenaline, NA) in lambs (n = 45) at different age/slaughter weight [suckling vs light], in farm (T0), after transport (T1), in the slaughterhouse after lairage (T2) and (2) to study the effect of the type of stunning, electrically vs gas, on C, A and NA values, in both groups o…	Animal welfare; Carbon dioxide (CO<sub>2</sub>); Catecholamines; Cortisol; Lamb; Pre-slaughter handling; Stunning; Weight	English	Article	Final		Scopus	2-s2.0-41549149691
	Bergamin C.; Comin A.; Corazzin M.; Faustini M.; Peric T.; Scollo A.; Gottardo F.; Montillo M.; Prandi A.	57210852978; 7801313871; 24491417800; 6603909163; 37461963600; 53982072500; 8625094600; 55190023300; 6701698754	Cortisol, DHEA, and sexual steroid concentrations in fattening pigs’ hair	no slaughter context	2019	Animals	9	6	345				10.3390/ani9060345	13	https://www.scopus.com/inward/record.uri?eid=2-s2.0-85071189627&doi=10.3390%2fani9060345&partnerID=40&md5=cdacc398b743b3b60270d699abc2d39d	Department of Agricultural, Food, Environmental and Animal Sciences, University of Udine, Udine, 33100, Italy; Department of Veterinary Medicine, University of Milano, Milano, 20133, Italy; Department of Animal Medicine, Production and Health, University of Padova, Agripolis Legnaro, 35020, PD, Italy	Bergamin C., Department of Agricultural, Food, Environmental and Animal Sciences, University of Udine, Udine, 33100, Italy; Comin A., Department of Agricultural, Food, Environmental and Animal Sciences, University of Udine, Udine, 33100, Italy; Corazzin M., Department of Agricultural, Food, Environmental and Animal Sciences, University of Udine, Udine, 33100, Italy; Faustini M., Department of Vet…	The aim of this study was to analyze the feasibility and reliability of using hair as a matrix to determine the dehydroepiandrosterone (DHEA) and sexual steroid concentrations and the cortisol/DHEA ratio in fattening pigs. The results could be also used to plan future research to identify threshold values in order to set up strategies to control the allostatic load and increase the resilience of …	Allostatic load; Fattening pigs; Hair; Steroid hormones	English	Article	Final	All Open Access; Gold Open Access; Green Open Access	Scopus	2-s2.0-85071189627
	Slotow R.; Blackmore A.; Henley M.; Trendler K.; Garaï M.	7004596566; 57189361308; 36186730000; 57279911500; 8634033100	Could Culling of Elephants Be Considered Inhumane and Illegal in South African Law?	no slaughter context	2021	Journal of International Wildlife Law and Policy	24	2023-04-03		181	206	25	10.1080/13880292.2021.1972529	4	https://www.scopus.com/inward/record.uri?eid=2-s2.0-85116050981&doi=10.1080%2f13880292.2021.1972529&partnerID=40&md5=eeabaadd767b6fadfdbe095ae1463c49			Elephant culling is included in National Norms and Standards for the Management of Elephants in the Republic of South Africa, as a last-resort option to reduce elephant population size when required to meet reserve objectives. Recent judgments in South African courts have emphasised the importance of considering animal welfare in conservation. We assess the approved method of culling elephant fam…		English	Article	Final		Scopus	2-s2.0-85116050981
	Miranda-de la Lama G.C.; Villarroel M.; Liste G.; Escós J.; María G.A.	57226721051; 7003443916; 11539938500; 6603891358; 7006219583	Critical points in the pre-slaughter logistic chain of lambs in Spain that may compromise the animal's welfare	no slaughter context	2010	Small Ruminant Research	90	2023-03-01		174	178	4	10.1016/j.smallrumres.2010.02.011	52	https://www.scopus.com/inward/record.uri?eid=2-s2.0-77950857764&doi=10.1016%2fj.smallrumres.2010.02.011&partnerID=40&md5=25b62a6f72307047437f5b7d5db3bc39	Department of Animal Production and Food Science, Faculty of Veterinary Medicine, University of Zaragoza, 50013 Zaragoza, Miguel Servet 177, Spain; Department of Animal Science, E.T.S.I.A. Polytechnic University of Madrid, Spain; Animal Welfare Group, Moulton College, Moulton, NN3 7RR Northampton, West Street, United Kingdom	Miranda-de la Lama G.C., Department of Animal Production and Food Science, Faculty of Veterinary Medicine, University of Zaragoza, 50013 Zaragoza, Miguel Servet 177, Spain; Villarroel M., Department of Animal Science, E.T.S.I.A. Polytechnic University of Madrid, Spain; Liste G., Animal Welfare Group, Moulton College, Moulton, NN3 7RR Northampton, West Street, United Kingdom; Escós J., Department …	This study identifies critical points of lamb transport to slaughter in Spain with regard to handling before, during and after transport. Special emphasis was given to the effect of classification centres (i.e. temporary feedlots). Farmers (n = 60), hauliers (n = 30), abattoirs (n = 20) and classification centres (n = 11) were surveyed. Data were collected on methods and facilities used for loadi…	Animal welfare; Critical points; Lambs; Pre-slaughter logistic chain; Transport	English	Article	Final		Scopus	2-s2.0-77950857764
	Purcell N.	36914447500	Cruel intimacies and risky relationships: Accounting for suffering in industrial livestock production	no slaughter context	2011	Society and Animals	19	1		59	81	22	10.1163/156853011X545538	8	https://www.scopus.com/inward/record.uri?eid=2-s2.0-79251529197&doi=10.1163%2f156853011X545538&partnerID=40&md5=a7b4fa323715b8d59492de9cd400618d	University of California-Santa Cruz, United States	Purcell N., University of California-Santa Cruz, United States	This article investigates the hypothesis that greater human-livestock intimacy can deter cruelty and mitigate suffering in the industrial production of animals for human consumption. The history of industrial agriculture in North America is one of increasingly utilitarian, profit-based, and technologically mediated relationships between humans and the animals they raise and kill for food. Under w…	agriculture; animal welfare; cruelty; food production; industry; interspecies; intimacy; killing; labor; livestock; meat; risk; slaughter; slaughterhouse; stockyard; violence	English	Article	Final		Scopus	2-s2.0-79251529197
	Sunt Q.; Stevens C.; Newman C.; Buesching C.D.; Macdonald D.W.	56955656300; 56954234400; 35550720700; 6602916985; 7401463172	Cumulative experience, age-class, sex and season affect the behavioural responses of European badgers (Meles meles) to handling and sedation	no slaughter context	2015	Animal Welfare	24	4		373	385	12	10.7120/09627286.24.4.373	14	https://www.scopus.com/inward/record.uri?eid=2-s2.0-84946724328&doi=10.7120%2f09627286.24.4.373&partnerID=40&md5=fae06f7c679483a334cbaf9cd7fec381	School of Earth and Environmental Sciences, University of Adelaide, Glen Osmond, 5064, SA, Australia; Department of Animal and Plant Sciences, Alfred Denny Building, University of Sheffield, Western Bank, Sheffield, S10 2TN, United Kingdom; Wildlife Conservation Research Unit, Department of Zoology, University of Oxford, Recanati-Kaplan Centre, Tubney House, Abingdon Road, Tubney, Abingdon, Oxfor…	Sunt Q., School of Earth and Environmental Sciences, University of Adelaide, Glen Osmond, 5064, SA, Australia; Stevens C., Department of Animal and Plant Sciences, Alfred Denny Building, University of Sheffield, Western Bank, Sheffield, S10 2TN, United Kingdom; Newman C., Wildlife Conservation Research Unit, Department of Zoology, University of Oxford, Recanati-Kaplan Centre, Tubney House, Abingd…	The restraint and sedation of wild animals has welfare implications, thus animal handling procedures should be well-informed and optimised to adhere to welfare standards. Furthermore, it is important that handling procedures should not cause future trap avoidance. This is of particular pertinence to European badgers (Meles meles), subject to extensive cage-trapping, relating to bovine tuberculosi…	Animal welfare; Badger; Behavioural response; Injection; Restraint; Sedation	English	Article	Final		Scopus	2-s2.0-84946724328
	Fisher M.W.; Gregory N.G.; Muir P.D.	8946369500; 7102241955; 7102249136	Current practices on sheep and beef farms in New Zealand for depriving sheep of feed prior to transport for slaughter	no slaughter context	2012	New Zealand Veterinary Journal	60	3		171	175	4	10.1080/00480169.2011.645202	3	https://www.scopus.com/inward/record.uri?eid=2-s2.0-84859640572&doi=10.1080%2f00480169.2011.645202&partnerID=40&md5=236165d9a0040b9965782387a6eac9ef	Ministry of Agriculture and Forestry, Wellington 6140, PO Box 2526, New Zealand; The Royal Veterinary College, Hawkshead Lane, North Mymms, Hatfield, Herts, AL9 7TA, United Kingdom; On-Farm Research, Hastings, 4156, PO Box 1142, New Zealand	Fisher M.W., Ministry of Agriculture and Forestry, Wellington 6140, PO Box 2526, New Zealand; Gregory N.G., The Royal Veterinary College, Hawkshead Lane, North Mymms, Hatfield, Herts, AL9 7TA, United Kingdom; Muir P.D., On-Farm Research, Hastings, 4156, PO Box 1142, New Zealand	AIM: To assess current practices on sheep and beef farms that deprive sheep of feed prior to transport to facilitate effluent management and processing at slaughter.METHODS: A national telephone survey of 122 sheep and 346 sheep and beef farmers was conducted in March and April 2010. They were asked how long sheep were held off green feed prior to transport and why, what environment the sheep wer…	animal welfare; carcass quality; effluent accumulation; fasting; sheep; slaughter; transport	English	Article	Final	All Open Access; Green Open Access	Scopus	2-s2.0-84859640572
	Dahl-Pedersen K.	55324143700	Danish Cattle Farmers' Experience With Fitness for Transport – A Questionnaire Survey	no slaughter context	2022	Frontiers in Veterinary Science	9		797149				10.3389/fvets.2022.797149	2	https://www.scopus.com/inward/record.uri?eid=2-s2.0-85127969309&doi=10.3389%2ffvets.2022.797149&partnerID=40&md5=ca02eede5140ab9edbe90d459ad6a876	Section for Medicine and Surgery, Department of Veterinary Clinical Sciences, University of Copenhagen, Copenhagen, Denmark	Dahl-Pedersen K., Section for Medicine and Surgery, Department of Veterinary Clinical Sciences, University of Copenhagen, Copenhagen, Denmark	Worldwide, cattle are transported in great numbers for breeding, fattening and slaughter. Within the European Union, the Council Regulation 1/2005 states that all animals must be fit for transport. Yet, the line between fit and unfit is blurred as the regulation allows for animals that are slightly ill or injured to be transported. However, “slightly ill or injured” lack a clear definition leavin…	animal transport; animal welfare; cattle; farmers; fitness for transport; pre-slaughter logistic chain	English	Article	Final	All Open Access; Gold Open Access; Green Open Access	Scopus	2-s2.0-85127969309
	Magrin L.; Contiero B.; Cozzi G.; Gottardo F.	56525437000; 6508201101; 35500532500; 8625094600	Data on Gastrointestinal and Claw Disorders as Possible Predictive Factors in Beef Cattle and Veal Calves’ Health and Welfare	no slaughter context	2022	Data	7	4	43				10.3390/data7040043	0	https://www.scopus.com/inward/record.uri?eid=2-s2.0-85129055443&doi=10.3390%2fdata7040043&partnerID=40&md5=4d7176a247069c45fd6746889f70328f	Department of Animal Medicine, Production and Health, University of Padova, Legnaro, 35020, Italy	Magrin L., Department of Animal Medicine, Production and Health, University of Padova, Legnaro, 35020, Italy; Contiero B., Department of Animal Medicine, Production and Health, University of Padova, Legnaro, 35020, Italy; Cozzi G., Department of Animal Medicine, Production and Health, University of Padova, Legnaro, 35020, Italy; Gottardo F., Department of Animal Medicine, Production and Health, U…	Today, consumers have a growing concern about the welfare of beef cattle, and specific schemes have been proposed to assess their wellbeing during the fattening. On‐farm assessments can be integrated and partially replaced by animal‐based measures recorded postmortem at the abattoir. Postmortem organ inspection data are of value, as several lesions can be reflective of subclinical diseases not ea…	beef cattle; claw disorders; gastrointestinal disorders; intensive fattening system; veal calves	English	Article	Final	All Open Access; Gold Open Access	Scopus	2-s2.0-85129055443
	Yu H.; Morota G.; Celestino E.F., Jr.; Dahlen C.R.; Wagner S.A.; Riley D.G.; Hulsman Hanna L.L.	57195972353; 55356558800; 57205680367; 6603914610; 21433910800; 57210456336; 55991672500	Deciphering Cattle Temperament Measures Derived From a Four-Platform Standing Scale Using Genetic Factor Analytic Modeling	no slaughter context	2020	Frontiers in Genetics	11		599				10.3389/fgene.2020.00599	8	https://www.scopus.com/inward/record.uri?eid=2-s2.0-85087033209&doi=10.3389%2ffgene.2020.00599&partnerID=40&md5=7e0c8dc3ada2f4d154db1a4f9d224d9b	Department of Animal and Poultry Sciences, Virginia Polytechnic Institute and State University, Blacksburg, VA, United States; Department of Animal Sciences, North Dakota State University, Fargo, ND, United States; Department of Animal Science, Texas AM University, College Station, TX, United States	Yu H., Department of Animal and Poultry Sciences, Virginia Polytechnic Institute and State University, Blacksburg, VA, United States; Morota G., Department of Animal and Poultry Sciences, Virginia Polytechnic Institute and State University, Blacksburg, VA, United States; Celestino E.F., Jr., Department of Animal Sciences, North Dakota State University, Fargo, ND, United States; Dahlen C.R., Depar…	The animal's reaction to human handling (i.e., temperament) is critical for work safety, productivity, and welfare. Subjective phenotyping methods have been traditionally used in beef cattle production. Even so, subjective scales rely on the evaluator's knowledge and interpretation of temperament, which may require substantial experience. Selection based on such subjective scores may not precisel…	beef cattle; factor analysis; four-platform standing scale; precision agriculture; temperament	English	Article	Final	All Open Access; Gold Open Access; Green Open Access	Scopus	2-s2.0-85087033209
	Meyer A.; Cloete S.W.P.; Brown C.R.; Van Schalkwyk S.J.	7401839753; 7006191945; 56006714000; 6601929207	Declawing ostrich (Struthio camelus domesticus) chicks to minimize skin damage during rearing	no slaughter context	2002	South African Journal of Animal Sciences	32	3		192	200	8		6	https://www.scopus.com/inward/record.uri?eid=2-s2.0-0038141493&partnerID=40&md5=12bdbeb65241762b34b62446099f0669	Klein Karoo Agricultural Development Centre, Oudtshoorn 6620, P.O. Box 351, South Africa; Elsenburg Agricultural Development Centre, Elsenburg 7607, Private Bag X1, South Africa; School of Animal, Plant and Environmental Sciences, University of the Witwatersrand, Wits 2050, Private Bag 3, South Africa; Hartpury College, Hartpury, Gloucestershire, GL19 3BE, United Kingdom	Meyer A., Klein Karoo Agricultural Development Centre, Oudtshoorn 6620, P.O. Box 351, South Africa, School of Animal, Plant and Environmental Sciences, University of the Witwatersrand, Wits 2050, Private Bag 3, South Africa; Cloete S.W.P., Elsenburg Agricultural Development Centre, Elsenburg 7607, Private Bag X1, South Africa; Brown C.R., School of Animal, Plant and Environmental Sciences, Univer…	Leather is one of the main products derived from ostrich farming. Current rearing practices lead to a high incidence of skin damage, which decreases the value of ostrich skins. In the emu and poultry industry, declawing is commonly practiced to reduce skin damage and injuries. We consequently investigated declawing of ostrich chicks as a potential management practice to minimize skin lesions that…	Behaviour; Declawing; Leather; Ostrich; Skin damage	English	Article	Final		Scopus	2-s2.0-0038141493
	Mies P.D.; Covington B.R.; Harris K.B.; Lucia L.M.; Acuff G.R.; Savell J.W.	6507040993; 6602991812; 7402243916; 7005531333; 7003352361; 7005391044	Decontamination of cattle hides prior to slaughter using washes with and without antimicrobial agents	no slaughter context	2004	Journal of Food Protection	67	3		579	582	3	10.4315/0362-028X-67.3.579	44	https://www.scopus.com/inward/record.uri?eid=2-s2.0-2142657326&doi=10.4315%2f0362-028X-67.3.579&partnerID=40&md5=8d38a21e11b791b367cf076b0d514f90	Department of Animal Science, Texas Agric. Experiment Station, Texas A and M University, College Station, TX 77843-2471, United States	Mies P.D., Department of Animal Science, Texas Agric. Experiment Station, Texas A and M University, College Station, TX 77843-2471, United States; Covington B.R., Department of Animal Science, Texas Agric. Experiment Station, Texas A and M University, College Station, TX 77843-2471, United States; Harris K.B., Department of Animal Science, Texas Agric. Experiment Station, Texas A and M University…	Two trials were conducted to determine the efficacy of cattle wash treatments in reducing pathogens on hides of cattle before slaughter. In trial I, live cattle (n = 120) were washed in an automated, commercial cattle wash system with one of four treatments (single water wash, double water wash, water wash with 0.5% L-lactic acid, or water wash with 50 ppm chlorine). Samples were collected at thr…		English	Article	Final	All Open Access; Bronze Open Access	Scopus	2-s2.0-2142657326
	Talbot S.R.; Biernot S.; Bleich A.; van Dijk R.M.; Ernst L.; Häger C.; Helgers S.O.A.; Koegel B.; Koska I.; Kuhla A.; Miljanovic N.; Müller-Graff F.-T.; Schwabe K.; Tolba R.; Vollmar B.; Weegh N.; Wölk T.; Wolf F.; Wree A.; Zieglowski L.; Potschka H.; Zechner D.	56513423900; 57079276200; 8691271700; 55761326900; 57194026064; 56957949900; 57210315292; 57195672747; 57202781512; 25422047900; 57211641964; 57203304886; 7006631485; 6701370763; 55670933900; 57204268653; 57192253551; 57200792641; 7004689368; 57204449929; 6603782279; 6602319235	Defining body-weight reduction as a humane endpoint: a critical appraisal	no slaughter context	2020	Laboratory Animals	54	1		99	110	11	10.1177/0023677219883319	38	https://www.scopus.com/inward/record.uri?eid=2-s2.0-85074811744&doi=10.1177%2f0023677219883319&partnerID=40&md5=e75b638acd0ba556280f9f1e9c25c1d2	Institute for Laboratory Animal Science, Hannover Medical School, Germany; Institute of Pharmacology, Toxicology, and Pharmacy, Ludwig-Maximilians-University, Germany; Institute for Laboratory Animal Science Experimental Surgery and Central Laboratory for Laboratory Animal Science, RWTH Aachen University, Germany; Department of Neurosurgery, Hannover Medical School, Germany; Rudolf-Zenker-Institu…	Talbot S.R., Institute for Laboratory Animal Science, Hannover Medical School, Germany; Biernot S., Institute for Laboratory Animal Science, Hannover Medical School, Germany; Bleich A., Institute for Laboratory Animal Science, Hannover Medical School, Germany; van Dijk R.M., Institute of Pharmacology, Toxicology, and Pharmacy, Ludwig-Maximilians-University, Germany; Ernst L., Institute for Labora…	In many animal experiments scientists and local authorities define a body-weight reduction of 20% or more as severe suffering and thereby as a potential parameter for humane endpoint decisions. In this study, we evaluated distinct animal experiments in multiple research facilities, and assessed whether 20% body-weight reduction is a valid humane endpoint criterion in rodents. In most experiments …	distress; euthanasia; rodent; severity; stress	English	Article	Final		Scopus	2-s2.0-85074811744
	Hesterman H.; Gregory N.G.; Boardman W.S.J.	23004563100; 7102241955; 6603729703	Deflighting procedures and their welfare implications in captive birds	no slaughter context	2001	Animal Welfare	10	4		405	419	14		17	https://www.scopus.com/inward/record.uri?eid=2-s2.0-0346511455&partnerID=40&md5=8630c57d89fc9e55201903f6efadcfad	Inst. Vet., Anim. and Biomed. Sci., Massey University, Palmerston North, Private Bag 11222, New Zealand; School of Zoology, Hobart, Tasmania 7001, GPO Box 252-05, Australia; S. Australian R. and D. Institute, Flaxley, SA 5153, PO Box 1571, Australia; Uganda Wildlife Education Centre, Entebbe, PO Box 369, Uganda	Hesterman H., Inst. Vet., Anim. and Biomed. Sci., Massey University, Palmerston North, Private Bag 11222, New Zealand, School of Zoology, Hobart, Tasmania 7001, GPO Box 252-05, Australia; Gregory N.G., S. Australian R. and D. Institute, Flaxley, SA 5153, PO Box 1571, Australia; Boardman W.S.J., Uganda Wildlife Education Centre, Entebbe, PO Box 369, Uganda	Deflighting is used to prevent large captive birds from escaping by limiting their ability to fly. This practice deprives birds of this normal behaviour, but can allow them to express other behaviours that would be suppressed if they were confined to cages or aviaries. The potential negative welfare issues associated with deflighting include the stress of capture and restraint, pain and discomfor…	Animal welfare; Deflighting; Feather clipping; Patagiectomy; Pinioning; Tenonectomy	English	Article	Final		Scopus	2-s2.0-0346511455
	Butterworth A.; Weeks C.A.; Crea P.R.; Kestin S.C.	7007102016; 7006218839; 57212815334; 7004016413	Dehydration and lameness in a broiler flock	no slaughter context	2002	Animal Welfare	11	1		89	94	5		28	https://www.scopus.com/inward/record.uri?eid=2-s2.0-0036188437&partnerID=40&md5=d3804d28ea95832e112528a21fc0109e	Dept. of Clinical Veterinary Science, Univ. of Bristol Veterinary School, N Somerset BS40 5DU, Langford, United Kingdom	Butterworth A., Dept. of Clinical Veterinary Science, Univ. of Bristol Veterinary School, N Somerset BS40 5DU, Langford, United Kingdom; Weeks C.A., Dept. of Clinical Veterinary Science, Univ. of Bristol Veterinary School, N Somerset BS40 5DU, Langford, United Kingdom; Crea P.R., Dept. of Clinical Veterinary Science, Univ. of Bristol Veterinary School, N Somerset BS40 5DU, Langford, United Kingdo…	A case study is described in which a high incidence of lameness in broiler chickens (Gallus gallus domesticus) is associated with rearing to 84 days of age; broilers are normally slaughtered at less than 50 days of age. A sample of 185 birds was scored for walking ability, and 24 birds from this group were assessed for dehydration by measuring plasma osmolality. The proportion of the group having…	Animal welfare; Broiler chicken; Dehydration; Lameness; Leg weakness; Slaughter age	English	Article	Final		Scopus	2-s2.0-0036188437
	Lambertz C.; Leopold J.; Ammer S.; Leiber F.; Thesing B.; Wild C.; Damme K.	35237747600; 57211484624; 57190378292; 6603201767; 57221933769; 57221938045; 12645785700	Demand-oriented riboflavin supply of organic broiler using a feed material from fermentation of Ashbya gossypii	no slaughter context	2021	Animal	15	1	100003				10.1016/j.animal.2020.100003	4	https://www.scopus.com/inward/record.uri?eid=2-s2.0-85100679202&doi=10.1016%2fj.animal.2020.100003&partnerID=40&md5=500d3a345b1c94139b9b0f5a96d07fed	Research Institute of Organic Agriculture (FiBL), Kasseler Strasse 1a, Frankfurt am Main, 60486, Germany; Research Institute of Organic Agriculture (FiBL), Ackerstrasse 113, Frick, 5070, Switzerland; Department of Animal Sciences, Georg-August-University, Albrecht-Thaer-Weg 3, Göttingen, 37075, Germany; Poultry Competence Centre of the Bavarian Institute for Agriculture, Mainbernheimer Strasse 10…	Lambertz C., Research Institute of Organic Agriculture (FiBL), Kasseler Strasse 1a, Frankfurt am Main, 60486, Germany; Leopold J., Research Institute of Organic Agriculture (FiBL), Kasseler Strasse 1a, Frankfurt am Main, 60486, Germany; Ammer S., Research Institute of Organic Agriculture (FiBL), Ackerstrasse 113, Frick, 5070, Switzerland, Department of Animal Sciences, Georg-August-University, Al…	Alternatives to riboflavin (vitamin B2) production by recombinant microorganisms are needed in organic poultry production, but are cost-intensive, so that a demand-oriented riboflavin supply is necessary. Details on the riboflavin requirements of organic poultry are not available. A feed material with high native riboflavin content from fermentation of the filamentous fungus Ashbya gossypii was s…	Chicken; Fattening; Health; Performance; Vitamin B<sub>2</sub>	English	Article	Final	All Open Access; Gold Open Access	Scopus	2-s2.0-85100679202
	Weber, Veronika; Hiller, Anne; Ellerbroek, Lueppo		Design of a system to determine cattle-hide cleanliness with respect to national specifications	no slaughter context	2021	JOURNAL OF FOOD SAFETY AND FOOD QUALITY-ARCHIV FUR LEBENSMITTELHYGIENE	72	2		38	48		10.2376/0003-925X-71-38					With the amendment of the Administrative Regulation on Food Hygiene 2019 (AVV LmH), the requirements of the EU regulation to only allow clean animals for slaughter were adopted nationally. Annex 3 of the regulation describes a method for assessing the cleanliness of cattle, sheep, pigs and poultry delivered for slaughter. In the present work, a concept was developed for implementing the new regul…			Article			WOS
	Mansley L.M.; Donaldson A.I.; Thrusfield M.V.; Honhold N.	6603172563; 7101671327; 7003469012; 6603586247	Destructive tension: Mathematics versus experience - The progress and control of the 2001 foot and mouth disease epidemic in Great Britain	no slaughter context	2011	OIE Revue Scientifique et Technique	30	2		483	498	15	10.20506/rst.30.2.2054	41	https://www.scopus.com/inward/record.uri?eid=2-s2.0-80052705842&doi=10.20506%2frst.30.2.2054&partnerID=40&md5=5a6a4d24b6b3a29caaaedbb2c158e45e	Animal Health Divisional Office, Strathearn House, Broxden Business Park, Perth, PH1 1RX, Lamberkine Drive, United Kingdom; Bio-Vet Solutions Ltd., Guildford, Surrey, GU4 7LB, 290 London Road, United Kingdom; Veterinary Clinical Sciences, University of Edinburgh, Easter Bush Veterinary Centre, Roslin, Midlothian, EH33 2NG, United Kingdom; Euro-Edge Scotland Ltd., Grandville, Leith, Edinburgh, Uni…	Mansley L.M., Animal Health Divisional Office, Strathearn House, Broxden Business Park, Perth, PH1 1RX, Lamberkine Drive, United Kingdom; Donaldson A.I., Bio-Vet Solutions Ltd., Guildford, Surrey, GU4 7LB, 290 London Road, United Kingdom; Thrusfield M.V., Veterinary Clinical Sciences, University of Edinburgh, Easter Bush Veterinary Centre, Roslin, Midlothian, EH33 2NG, United Kingdom; Honhold N.,…	The 2001 foot and mouth disease epidemic in Great Britain was characterised by control using both traditional and novel methods, some resulting from conclusions of mathematical models. Seven days before the implementation of the novel controversial automatic pre-emptive culling of all susceptible livestock on premises adjacent to infected premises (the 'contiguous cull'), the spread of infection …	2001,3-km sheep cull; Biosecurity; Britain; Contiguous culling; Control procedure; Foot and mouth disease; Great Britain; Mathematical model; Stamping out	English	Article	Final		Scopus	2-s2.0-80052705842
	Clegg S.R.; Sullivan L.E.; Bell J.; Blowey R.W.; Carter S.D.; Evans N.J.	36571451000; 55972036700; 57212431065; 56658445400; 7402609645; 56820881500	Detection and isolation of digital dermatitis treponemes from skin and tail lesions in pigs	no slaughter context	2016	Research in Veterinary Science	104			64	70	6	10.1016/j.rvsc.2015.12.003	16	https://www.scopus.com/inward/record.uri?eid=2-s2.0-84957719084&doi=10.1016%2fj.rvsc.2015.12.003&partnerID=40&md5=be562d4919c8c67d8fad71e169d22025	Department of Infection Biology, Institute of Infection and Global Health, School of Veterinary Science, University of Liverpool, Liverpool Science Park IC2, 146 Brownlow Hill, Liverpool, L3 5RF, United Kingdom; University of Liverpool and The George Veterinary Hospital, High Street Malmesbury, Wiltshire, SN16 9AU, United Kingdom	Clegg S.R., Department of Infection Biology, Institute of Infection and Global Health, School of Veterinary Science, University of Liverpool, Liverpool Science Park IC2, 146 Brownlow Hill, Liverpool, L3 5RF, United Kingdom; Sullivan L.E., Department of Infection Biology, Institute of Infection and Global Health, School of Veterinary Science, University of Liverpool, Liverpool Science Park IC2, 14…	Pig skin lesions are common significant welfare issues, and can cause large economic losses, due to culling of severely affected animals or carcass condemnation at slaughter. It was considered that the treponemal bacteria associated with digital dermatitis (DD) lesions in cattle, sheep and goats may have a role in these pig lesions.Specific diagnostic PCR assays for three cultivable DD Treponema …	Digital dermatitis; Pigs; Skin lesions; Spirochetes; Treponema	English	Article	Final	All Open Access; Green Open Access	Scopus	2-s2.0-84957719084
	Bernau M.; Schwanitz S.; Kreuzer L.S.; Scholz A.M.	55940917200; 57199154034; 56487783800; 56375446900	Detection of local tissue reactions after anti-GnRF injection in male pigs assessed using magnetic resonance imaging	no slaughter context	2021	Animals	11	4	968				10.3390/ani11040968	1	https://www.scopus.com/inward/record.uri?eid=2-s2.0-85103341388&doi=10.3390%2fani11040968&partnerID=40&md5=7f45d658ba4e8eaff4fd6181df5c373f	Livestock Center Oberschleissheim, Veterinary Faculty of the Ludwig-Maximilians-University Munich, St. Hubertusstrasse 12, Oberschleissheim, 85764, Germany; Hochschule für Wirtschaft und Umwelt Nürtingen-Geislingen, Fakultät Agrarwirtschaft, Volkswirtschaft und Management, Neckarsteige 6-10, Nürtingen, 72622, Germany	Bernau M., Livestock Center Oberschleissheim, Veterinary Faculty of the Ludwig-Maximilians-University Munich, St. Hubertusstrasse 12, Oberschleissheim, 85764, Germany, Hochschule für Wirtschaft und Umwelt Nürtingen-Geislingen, Fakultät Agrarwirtschaft, Volkswirtschaft und Management, Neckarsteige 6-10, Nürtingen, 72622, Germany; Schwanitz S., Livestock Center Oberschleissheim, Veterinary Faculty …	This study aimed at evaluating the local tissue reaction of an anti-GnRF product, which is used for the so called “immunocastration” in male pigs. A total of 34 pigs were injected two times (including a booster injection) with an anti-GnRF product. Injection was performed using the prescribed safety vaccinator. Injection sites were evaluated three times post injection using magnetic resonance ima…	Anti-GnRF; Local reaction; Magnetic resonance imaging; Pigs	English	Article	Final	All Open Access; Gold Open Access	Scopus	2-s2.0-85103341388
	Martinez-Rodriguez R.; Roldan-Santiago P.; Flores-Peinado S.; Ramirez-Telles J.A.; Mora-Medina P.; Trujillo-Ortega M.E.; Gonzalez-Lozano M.; Becerril-Herrera M.; Sanchez-Hernandez M.; Mota-Rojas D.	44361191800; 42262742600; 14032985600; 54383945500; 54383862300; 6504226432; 56013674900; 14033043200; 48461884500; 6506739367	Deterioration of pork quality due to the effects of acute ante mortem stress: An overview	no slaughter context	2011	Asian Journal of Animal and Veterinary Advances	6	12		1170	1184	14	10.3923/ajava.2011.1170.1184	9	https://www.scopus.com/inward/record.uri?eid=2-s2.0-80755155889&doi=10.3923%2fajava.2011.1170.1184&partnerID=40&md5=f03b89b4bd7fd6c756e295ede05a3292	Center for Teaching, Research and Extension in Swine Production (CEIEPP), FMVZ, UniversidadNacional Autonoma de Mexico (UNAM), Mexico; Division of Animal Production Sciences and Health, Facultad de Medicina Veterinariary Zootecnia (FMVZ), Universidad Nacional Autonoma de Mexico (UNAM), Mexico D.F., 04510, Mexico; Department of Livestock Sciences, Facultad De Estudios Superiores Cuautitlan, Univer…	Martinez-Rodriguez R., Center for Teaching, Research and Extension in Swine Production (CEIEPP), FMVZ, UniversidadNacional Autonoma de Mexico (UNAM), Mexico; Roldan-Santiago P., Division of Animal Production Sciences and Health, Facultad de Medicina Veterinariary Zootecnia (FMVZ), Universidad Nacional Autonoma de Mexico (UNAM), Mexico D.F., 04510, Mexico; Flores-Peinado S., Department of Livestoc…	The incidence of poor quality meat associated with acute ante mortem stress is a condition that severely affects the pork production chain, so preventing it must become a priority in the pork industry. The aim of this review was to assess the most relevant ante mortem stressors that affect pork quality. Stress-related factors during production, transport, stunning and slaughter must be carefully …	Abattoir; Animal welfare; PSE; Stress; Stunning	English	Article	Final		Scopus	2-s2.0-80755155889
	Skaperda Z.; Kyriazis I.D.; Tekos F.; Alvanou M.V.; Nechalioti P.-M.; Makri S.; Argyriadou A.; Vouraki S.; Kallitsis T.; Kourti M.; Irene V.; Arsenos G.; Kouretas D.	57202806638; 56483049900; 57205459596; 57207822897; 57224546037; 16507346300; 57216893511; 57200160354; 57220751556; 57940432200; 57939568700; 6602426702; 7004229191	Determination of Redox Status in Different Tissues of Lambs and Kids and Their in-between Relationship	no slaughter context	2022	Antioxidants	11	10	2065				10.3390/antiox11102065	0	https://www.scopus.com/inward/record.uri?eid=2-s2.0-85140435254&doi=10.3390%2fantiox11102065&partnerID=40&md5=dbc49153378448d9eb72cf2d3abee0ba	Department of Biochemistry and Biotechnology, University of Thessaly, Viopolis, Mezourlo, Larissa, 41500, Greece; Laboratory of Animal Husbandry, School of Veterinary Medicine, Faculty of Health Sciences, Aristotle University of Thessaloniki, Thessaloniki, 54124, Greece; Faculty of Veterinary Science, University of Thessaly, Karditsa, 43131, Greece	Skaperda Z., Department of Biochemistry and Biotechnology, University of Thessaly, Viopolis, Mezourlo, Larissa, 41500, Greece; Kyriazis I.D., Department of Biochemistry and Biotechnology, University of Thessaly, Viopolis, Mezourlo, Larissa, 41500, Greece; Tekos F., Department of Biochemistry and Biotechnology, University of Thessaly, Viopolis, Mezourlo, Larissa, 41500, Greece; Alvanou M.V., Depar…	The objective of this study was to assess the resting values of the physiological oxidative stress exhibited by lambs and kids reared in Greece, and the potential correlations between redox biomarker levels in blood and other tissues (liver, diaphragm, quadriceps, psoas major muscle). For this purpose, lambs and kids at different developmental stages (d.s.) were used. The latter corresponded to f…	antioxidants; goat; meat quality; oxidative stress; redox biomarkers; sheep; welfare	English	Article	Final	All Open Access; Gold Open Access	Scopus	2-s2.0-85140435254
	Rutherford K.M.D.; Haskell M.J.; Glasbey C.; Jones R.B.; Lawrence A.B.	7007171616; 7003785083; 7004576462; 7501542730; 7203042046	Detrended fluctuation analysis of behavioural responses to mild acute stressors in domestic hens	no slaughter context	2003	Applied Animal Behaviour Science	83	2		125	139	14	10.1016/S0168-1591(03)00115-1	38	https://www.scopus.com/inward/record.uri?eid=2-s2.0-0042376199&doi=10.1016%2fS0168-1591%2803%2900115-1&partnerID=40&md5=47060df7fbad86d76ebc7d1d95ba9600	Welfare Biology Group, Roslin Institute (Edinburgh), Roslin, Midlothian EH25 9PS, United Kingdom; Animal Biology Division, SAC, Edinburgh EH9 3JG, West Mains Rd., United Kingdom; Biomathematics/Statistics Scotland, JCMB, King's Buildings, Edinburgh EH9 3JZ, United Kingdom	Rutherford K.M.D., Welfare Biology Group, Roslin Institute (Edinburgh), Roslin, Midlothian EH25 9PS, United Kingdom; Haskell M.J., Animal Biology Division, SAC, Edinburgh EH9 3JG, West Mains Rd., United Kingdom; Glasbey C., Biomathematics/Statistics Scotland, JCMB, King's Buildings, Edinburgh EH9 3JZ, United Kingdom; Jones R.B., Welfare Biology Group, Roslin Institute (Edinburgh), Roslin, Midloth…	Fractal analysis provides a novel measure of behavioural complexity and has previously revealed subtle alterations in behaviour under biologically costly conditions, such as parasitism or disease. The analysis is based upon the temporal pattern of behaviour that, although rarely considered in behavioural studies, may provide information in addition to standard measures of duration and frequency. …	Behavioural complexity; Chickens; Detrended fluctuation analysis; Fractals; Stress	English	Article	Final		Scopus	2-s2.0-0042376199
	Dunston-Clarke E.; Willis R.S.; Fleming P.A.; Barnes A.L.; Miller D.W.; Collins T.	57216375523; 57216500509; 55756279200; 14622334100; 12755639000; 46961007000	Developing an animal welfare assessment protocol for livestock transported by sea	no slaughter context	2020	Animals	10	4	705				10.3390/ani10040705	14	https://www.scopus.com/inward/record.uri?eid=2-s2.0-85083703429&doi=10.3390%2fani10040705&partnerID=40&md5=f044dbe6d8a3aad1defe8d73ade4f708	School of Veterinary Medicine, College of Science, Health, Engineering and Education, Murdoch University, Perth, 6150, Australia	Dunston-Clarke E., School of Veterinary Medicine, College of Science, Health, Engineering and Education, Murdoch University, Perth, 6150, Australia; Willis R.S., School of Veterinary Medicine, College of Science, Health, Engineering and Education, Murdoch University, Perth, 6150, Australia; Fleming P.A., School of Veterinary Medicine, College of Science, Health, Engineering and Education, Murdoch…	Australian livestock industries face increased scrutiny from animal welfare groups and society, and the long-distance transport of livestock by sea has recently gained particular attention. Other than non-compliance with broad regulatory standards and voyage mortality rates, there is minimal information to ascertain the welfare of exported livestock. There is currently no standardised, validated …	Animal behaviour; Animal health; Cattle; Live export; Sheep	English	Article	Final	All Open Access; Gold Open Access; Green Open Access	Scopus	2-s2.0-85083703429
	Vieira A.; Brandão S.; Monteiro A.; Ajuda I.; Stilwell G.	35224388400; 57212520938; 7102146080; 56348776800; 23985990200	Development and validation of a visual body condition scoring system for dairy goats with picture-based training	no slaughter context	2015	Journal of Dairy Science	98	9		6597	6608	11	10.3168/jds.2015-9428	32	https://www.scopus.com/inward/record.uri?eid=2-s2.0-84939256169&doi=10.3168%2fjds.2015-9428&partnerID=40&md5=772bff33c71176c730e68c00e3b77f86	Animal Behaviour and Welfare Research Laboratory, Centre for Interdisciplinary Research in Animal Health, Faculdade de Medicina Veterinária, Universidade de Lisboa, Avenida da Universidade Técnica, Lisboa, 1300-477, Portugal; Electrical and Computers Engineering, Instituto Superior Técnico, Universidade de Lisboa, Avenida Rovisco Pais, Lisboa, 1049-001, Portugal; Electrical and Computers Engineer…	Vieira A., Animal Behaviour and Welfare Research Laboratory, Centre for Interdisciplinary Research in Animal Health, Faculdade de Medicina Veterinária, Universidade de Lisboa, Avenida da Universidade Técnica, Lisboa, 1300-477, Portugal; Brandão S., Electrical and Computers Engineering, Instituto Superior Técnico, Universidade de Lisboa, Avenida Rovisco Pais, Lisboa, 1049-001, Portugal, Electrical…	Body condition scoring (BCS) is the most widely used method to assess changes in body fat reserves, which reflects its high potential to be included in on-farm welfare assessment protocols. Currently used scoring systems in dairy goats require animal restraint for body palpation. In this study, the Animal Welfare Indicators project (AWIN) proposes to overcome this constraint by developing a scori…	Body condition scoring; Dairy goat; Representative image; Template alignment; Visual body condition scoring system	English	Article	Final	All Open Access; Bronze Open Access	Scopus	2-s2.0-84939256169
	Unger J.K.; Gerlach J.C.; Juhr N.C.; Rossaint R.	7203019583; 7201562669; 7004868250; 55416543900	Development of a special catheterbag to enable artificial organ evaluation in conscious, unrestrained pigs: Technical note	no slaughter context	2000	International Journal of Artificial Organs	23	4		268	274	6	10.1177/039139880002300410	4	https://www.scopus.com/inward/record.uri?eid=2-s2.0-0034115620&doi=10.1177%2f039139880002300410&partnerID=40&md5=f1f5ab4f6fe11e739670662003027d29	Ctrl. Anim. Experimentation Facility, Department of Veterinary Medicine, FU Berlin, Berlin, Germany; Department of Anaesthesiology, University Clinic, RWTH Aachen, G-52057 Aachen, Pauwelsstr. 30, Germany	Unger J.K., Department of Anaesthesiology, University Clinic, RWTH Aachen, G-52057 Aachen, Pauwelsstr. 30, Germany; Gerlach J.C.; Juhr N.C., Ctrl. Anim. Experimentation Facility, Department of Veterinary Medicine, FU Berlin, Berlin, Germany; Rossaint R.	Pigs are widely used as models for a variety of human diseases, because many of their physiological functions closely resemble those of humans. However, information on instrumentation techniques is still scarce. In particular, experiments in conscious pigs focused on extracorporeal circuits are connected to a variety of methodical problems with respect to the handling of the animals. Usually, pig…	Animal model; Conscious; Extracorporeal circuit; Instrumentation; Swine	English	Article	Final		Scopus	2-s2.0-0034115620
	Brandt P.; Rousing T.; Herskin M.S.; Olsen E.V.; Aaslyng M.D.	55860862300; 6603642018; 6701544023; 7201962796; 55663090900	Development of an index for the assessment of welfare of finishing pigs from farm to slaughter based on expert opinion	no slaughter context	2017	Livestock Science	198			65	71	6	10.1016/j.livsci.2017.02.008	7	https://www.scopus.com/inward/record.uri?eid=2-s2.0-85011915344&doi=10.1016%2fj.livsci.2017.02.008&partnerID=40&md5=f27984c9de545a235c5e4e95cad019fe	Aarhus University, Department of Animal Science, AU-Foulum, PO Box 50, Tjele, DK-8830, Denmark; Danish Technological Institute, Danish Meat Research Institute, Gregersensvej 9, Taastrup, DK-2630, Denmark	Brandt P., Aarhus University, Department of Animal Science, AU-Foulum, PO Box 50, Tjele, DK-8830, Denmark, Danish Technological Institute, Danish Meat Research Institute, Gregersensvej 9, Taastrup, DK-2630, Denmark; Rousing T., Aarhus University, Department of Animal Science, AU-Foulum, PO Box 50, Tjele, DK-8830, Denmark; Herskin M.S., Aarhus University, Department of Animal Science, AU-Foulum, P…	For pigs, the day of slaughter involves potential animal welfare threatening elements at different stages such as pick-up pens, loading, transport, unloading, lairage and race. At present no tool for assessing the welfare of finishing pigs from farm exit to stunning is available. The present study builds on a protocol for assessment of animal welfare of finishing pigs on the day of slaughter, a p…	Animal welfare; Expert opinion; Finishing pig; Heart rate; Welfare assessment; Welfare index	English	Article	Final		Scopus	2-s2.0-85011915344
	Maggiolino A.; Bragaglio A.; Salzano A.; Rufrano D.; Claps S.; Sepe L.; Damiano S.; Ciarcia R.; Dinardo F.R.; Hopkins D.L.; Neglia G.; De Palo P.	46661694200; 56458998000; 56106251600; 55191362200; 8683217400; 8528879000; 24167712500; 6507675618; 57196043809; 55947465100; 6602529587; 12807786100	Dietary supplementation of suckling lambs with anthocyanins: Effects on growth, carcass, oxidative and meat quality traits	no slaughter context	2021	Animal Feed Science and Technology	276		114925				10.1016/j.anifeedsci.2021.114925	12	https://www.scopus.com/inward/record.uri?eid=2-s2.0-85103975612&doi=10.1016%2fj.anifeedsci.2021.114925&partnerID=40&md5=77094b5dd2d700e7d9215f0d09ddf7be	Department of Veterinary Medicine, University “Aldo Moro” of Bari, S.P. per Casamassima, km 3, Valenzano, 70010, BA, Italy; Department of Veterinary Medicine and Animal Production (DMVPA), University of Naples Federico II, Naples, Via Federico Delpino 1, Napoli, 80137, Italy; Council for Agricultural Research and Economics - Research Centre for Animal Production and Aquaculture, S.S.7 Via Appia, …	Maggiolino A., Department of Veterinary Medicine, University “Aldo Moro” of Bari, S.P. per Casamassima, km 3, Valenzano, 70010, BA, Italy; Bragaglio A., Department of Veterinary Medicine, University “Aldo Moro” of Bari, S.P. per Casamassima, km 3, Valenzano, 70010, BA, Italy; Salzano A., Department of Veterinary Medicine and Animal Production (DMVPA), University of Naples Federico II, Naples, Via…	The aim of this research was to assess the effect of the dietary inclusion in suckling lambs of a red orange and lemon extract rich in anthocyanins on growth performance, antioxidant status, carcass characteristics and of both dietary antioxidant addition and aging on meat fatty acids, colorimetric and antioxidant profile, and meat texture. The experiment was carried out using 44 Merino male lamb…	Antioxidant additives; Fatty acids; Lamb meat; Oxidative status	English	Article	Final		Scopus	2-s2.0-85103975612
	Rettenbacher S.; Palme R.; Hackl R.; Bamberg E.	8709016200; 55119967900; 8948235400; 7006317096	Distribution and elimination of radiolabeled corticosterone in chicken broilers	no slaughter context	2006	Wiener Tierarztliche Monatsschrift	93	2023-12-11		283	287	4		3	https://www.scopus.com/inward/record.uri?eid=2-s2.0-52449127473&partnerID=40&md5=082cef7275adf4f69b6d123e2de402af	Institute of Biochemistry, University of Veterinary Medicine, Vienna, Austria; Department of Natural Sciences, Clinic for Avian, Reptile and Fish Medicine, University of Veterinary Medicine, Vienna, Austria; A-1210 Vienna, Veterinärplatz 1, Austria	Rettenbacher S., Institute of Biochemistry, University of Veterinary Medicine, Vienna, Austria, A-1210 Vienna, Veterinärplatz 1, Austria; Palme R., Institute of Biochemistry, University of Veterinary Medicine, Vienna, Austria, A-1210 Vienna, Veterinärplatz 1, Austria; Hackl R., Department of Natural Sciences, Clinic for Avian, Reptile and Fish Medicine, University of Veterinary Medicine, Vienna, …	The critical evaluation and reduction of stressful processes involved in farm animal husbandry, transport and slaughter represent serious issues in animal welfare discussion. Elevated concentrations of adrenocortical hormones are potential indicators of various forms of stress, however, the negative effects of the blood sampling procedure pose serious limitations to their measurement in the plasm…	Broiler; Carcass; Corticosteroids; Stress	English	Article	Final		Scopus	2-s2.0-52449127473
	Devos G.; Moons C.P.H.; Houf K.	57191484010; 9270850600; 6603553916	Diversity, not uniformity: slaughter and electrical waterbath stunning procedures in Belgian slaughterhouses	no slaughter context	2018	Poultry Science	97	9		3369	3379	10	10.3382/ps/pey181	5	https://www.scopus.com/inward/record.uri?eid=2-s2.0-85055078950&doi=10.3382%2fps%2fpey181&partnerID=40&md5=5bafa05e4b12e7c53d9e8ee64b3b8a1d	Department of Animal Nutrition, Genetics, Ethology, Faculty of Veterinary Medicine, Ghent University, Heidestraat 19, Merelbeke, 9820, Belgium; Department of Veterinary Public Health and Food Safety, Faculty of Veterinary Medicine, Ghent University, Salisburylaan 133, Merelbeke, 9820, Belgium	Devos G., Department of Animal Nutrition, Genetics, Ethology, Faculty of Veterinary Medicine, Ghent University, Heidestraat 19, Merelbeke, 9820, Belgium, Department of Veterinary Public Health and Food Safety, Faculty of Veterinary Medicine, Ghent University, Salisburylaan 133, Merelbeke, 9820, Belgium; Moons C.P.H., Department of Animal Nutrition, Genetics, Ethology, Faculty of Veterinary Medici…	Data on slaughter and stunning protocols in Belgian poultry abattoirs were collected, and subsequently the survival rate after electrical waterbath stunning in 1,400 animals across 7 selected slaughterhouses was determined. The majority of the abattoirs applied electrical waterbath stunning (72%), whereas the other methods were gas stunning (13%), head-only stunning (6%), and dry stunning (3%). I…	electrical waterbath stunning; poultry; survival rate; technical setting	English	Article	Final	All Open Access; Hybrid Gold Open Access	Scopus	2-s2.0-85055078950
	Schild S.L.A.; Rousing T.; Jensen H.E.; Barington K.; Herskin M.S.	56452603800; 6603642018; 35595226100; 55949752500; 6701544023	Do umbilical outpouchings affect the behaviour or clinical condition of pigs during 6h housing in a pre-transport pick-up facility?	no slaughter context	2015	Research in Veterinary Science	101			126	131	5	10.1016/j.rvsc.2015.06.005	10	https://www.scopus.com/inward/record.uri?eid=2-s2.0-84938687131&doi=10.1016%2fj.rvsc.2015.06.005&partnerID=40&md5=d737ceff8c91a10d24ce08a06ef62bf0	Department of Animal Science, Aarhus University, Blichers Allé 20, Tjele, DK-8830, Denmark; Department of Veterinary Disease Biology, University of Copenhagen, Copenhagen, Denmark	Schild S.L.A., Department of Animal Science, Aarhus University, Blichers Allé 20, Tjele, DK-8830, Denmark; Rousing T., Department of Animal Science, Aarhus University, Blichers Allé 20, Tjele, DK-8830, Denmark; Jensen H.E., Department of Veterinary Disease Biology, University of Copenhagen, Copenhagen, Denmark; Barington K., Department of Veterinary Disease Biology, University of Copenhagen, Cope…	This study focused on behavioural and clinical effects of umbilical outpouchings (UOs) in pigs. Matched pairs of pigs with UOs (diameter 12 cm; range 4-20; diagnosed p.m. as hernia or non-hernia) and controls (N = 28) were compared during a 6-h stay in a pick-up facility. Overall, skin lesion scores were increased after the 6-h stay. Behaviour of the UO-pigs differed from the controls (a shorter …	Behaviour; Fitness for transport; Slaughter pigs; Umbilical hernia; Umbilical outpouching; Welfare	English	Article	Final		Scopus	2-s2.0-84938687131
	Harley S.; Boyle L.A.; O'Connell N.E.; More S.J.; Teixeira D.L.; Hanlon A.	56246675900; 23491537100; 7006123507; 57226208474; 7005728028; 7005016358	Docking the value of pigmeat? Prevalence and financial implications of welfare lesions in Irish slaughter pigs	no slaughter context	2014	Animal Welfare	23	3		275	285	10	10.7120/09627286.23.3.275	70	https://www.scopus.com/inward/record.uri?eid=2-s2.0-84905826644&doi=10.7120%2f09627286.23.3.275&partnerID=40&md5=49ecf4219ccd2573a4c5e76d2b110fea	School of Veterinary Science, University of Liverpool, Neston, Cheshire CH64 7TE, United Kingdom; Animal and Grassland Research and Innovation Centre, Teagasc Moorepark, Fermoy, Co Cork, Ireland; Institute for Global Food Security, Northern Ireland Technology Centre, Queens University Belfast, Belfast BT9 5HN, Malone Road, United Kingdom; UCD School of Veterinary Medicine, University College Dubl…	Harley S., School of Veterinary Science, University of Liverpool, Neston, Cheshire CH64 7TE, United Kingdom; Boyle L.A., Animal and Grassland Research and Innovation Centre, Teagasc Moorepark, Fermoy, Co Cork, Ireland; O'Connell N.E., Institute for Global Food Security, Northern Ireland Technology Centre, Queens University Belfast, Belfast BT9 5HN, Malone Road, United Kingdom; More S.J., UCD Scho…	Expansion of the meat inspection process to incorporate animal-based welfare measurements could contribute towards significant improvements in pig (Sus scrofa domesticus) welfare and farm profitability. This study aimed to determine the prevalence of different welfare-related lesions on the carcase and their relationship with carcase condemnations (CC) and carcase weight (CW). The financial impli…	Animal welfare; Carcase; Economics; Meat inspection; Pig; Tail biting	English	Article	Final		Scopus	2-s2.0-84905826644
	Pesenti Rossi G.; Dalla Costa E.; Filipe J.F.S.; Mazzola S.M.; Motta A.; Borciani M.; Gastaldo A.; Canali E.; Pilia F.; Argenton M.; Caniatti M.; Pecile A.; Minero M.; Barbieri S.	57862903800; 57219222248; 57209327096; 7004071321; 57215559415; 56764613200; 57204406319; 6603626963; 57863408600; 57863675500; 56091949600; 7006713796; 21935074300; 56786632200	Does Immunocastration Affect Behaviour and Body Lesions in Heavy Pigs?	no slaughter context	2022	Veterinary Sciences	9	8	410				10.3390/vetsci9080410	0	https://www.scopus.com/inward/record.uri?eid=2-s2.0-85136809542&doi=10.3390%2fvetsci9080410&partnerID=40&md5=5805ede4b29d2cab0a2c289157e947f4	Department of Veterinary Medicine and Animal Science, Università degli Studi di Milano, Lodi, 26900, Italy; Fondazione C.R.P.A. Studi Ricerche, Reggio Emilia, 42121, Italy	Pesenti Rossi G., Department of Veterinary Medicine and Animal Science, Università degli Studi di Milano, Lodi, 26900, Italy; Dalla Costa E., Department of Veterinary Medicine and Animal Science, Università degli Studi di Milano, Lodi, 26900, Italy; Filipe J.F.S., Department of Veterinary Medicine and Animal Science, Università degli Studi di Milano, Lodi, 26900, Italy; Mazzola S.M., Department o…	Immunocastration has been pointed out as an alternative to surgical castration; though, most of the scientific studies were performed in light pig production. This study aimed to evaluate the effect of immunocastration on animal welfare in heavy pig production through the evaluation of behaviour and body lesions. A total of 188 commercial-hybrid pigs were randomly allocated into two treatment gro…	animal welfare; behaviour; body lesion; carcass traits; heavy pig; immunocastration; productive performances; salivary testosterone	English	Article	Final	All Open Access; Gold Open Access; Green Open Access	Scopus	2-s2.0-85136809542
	Nasr M.A.F.; Mohammed H.; Hassan R.A.; Swelum A.A.; Saadeldin I.M.	50262515100; 36182074500; 57194649036; 57192975672; 37862173300	Does light intensity affect the behavior, welfare, performance, meat quality, amino acid profile, and egg quality of Japanese quails?	no slaughter context	2019	Poultry Science	98	8		3093	3102	9	10.3382/ps/pez089	11	https://www.scopus.com/inward/record.uri?eid=2-s2.0-85069310073&doi=10.3382%2fps%2fpez089&partnerID=40&md5=1e7e4c5ee0c11eddedb887878d118a42	Animal Wealth Development Department, Faculty of Veterinary Medicine, Zagazig University, 44511, Egypt; Department of Veterinary Public Health, Faculty of Veterinary Medicine, Zagazig University, 44511, Egypt; Animal Wealth Development Department, Animal Production Division, Faculty of Veterinary Medicine, Suez Canal University, Ismailia, 41522, Egypt; Department of Animal Production, College of …	Nasr M.A.F., Animal Wealth Development Department, Faculty of Veterinary Medicine, Zagazig University, 44511, Egypt; Mohammed H., Department of Veterinary Public Health, Faculty of Veterinary Medicine, Zagazig University, 44511, Egypt; Hassan R.A., Animal Wealth Development Department, Animal Production Division, Faculty of Veterinary Medicine, Suez Canal University, Ismailia, 41522, Egypt; Swelu…	The current study aimed to explore the impact of different light intensities on behavior, welfare, performance, meat quality, amino acid content, and egg quality of Japanese quails. A total of 600 1-day-old Japanese quail chicks were used (300/batch). Chicks were homogeneously classified into 3 groups (each of 100); low (10 lux), moderate (50 lux). and high light intensity (250 lux) groups. There…	egg quality; light intensity; meat quality; quails performance	English	Article	Final	All Open Access; Hybrid Gold Open Access	Scopus	2-s2.0-85069310073
	Graunke K.L.; Telezhenko E.; Hessle A.; Bergsten C.; Loberg J.M.	36545000100; 22954834200; 6507896511; 7004666996; 16424608800	Does rubber flooring improve welfare and production in growing bulls in fully slatted floor pens?	no slaughter context	2011	Animal Welfare	20	2		173	183	10		29	https://www.scopus.com/inward/record.uri?eid=2-s2.0-79955366226&partnerID=40&md5=c2e5808df93af6036c96b951b17f1d2a	Swedish University of Agricultural Sciences, Department of Animal Environment and Health, SE-532 23 Skara, PO Box 234, Sweden; Swedish Dairy Association, SE-532 23 Skara, PO Box 234, Sweden	Graunke K.L., Swedish University of Agricultural Sciences, Department of Animal Environment and Health, SE-532 23 Skara, PO Box 234, Sweden; Telezhenko E., Swedish University of Agricultural Sciences, Department of Animal Environment and Health, SE-532 23 Skara, PO Box 234, Sweden; Hessle A., Swedish University of Agricultural Sciences, Department of Animal Environment and Health, SE-532 23 Skara…	This study compared the effects of concrete slats (CS), synthetic rubber slats on aluminium profiles (RS) and slotted rubber mats on concrete slats (RM) in fully slatted floor pens on behaviour, claw and leg disorders, claw horn growth, cleanliness and production parameters of growing dairy bulls from 225 to 650 kg average liveweight. Each pen housed five bulls up to 400 kg average liveweight and…	Animal welfare; Behaviour; Cattle; Claw health; Cleanliness; Performance	English	Article	Final		Scopus	2-s2.0-79955366226
	Schild S.L.A.; Brandt P.; Rousing T.; Herskin M.S.	56452603800; 55860862300; 6603642018; 6701544023	Does the presence of umbilical outpouchings affect the behaviour of pigs during the day of slaughter?	no slaughter context	2015	Livestock Science	176			146	151	5	10.1016/j.livsci.2015.03.023	7	https://www.scopus.com/inward/record.uri?eid=2-s2.0-84928927000&doi=10.1016%2fj.livsci.2015.03.023&partnerID=40&md5=a9f087d746ccf923a7bb4487dcb2f108	Department of Animal Science, Aarhus University, Blichers Allé 20, Tjele, DK-8830, Denmark; Danish Meat Research Institute, Maglegaardsvej 2, Roskilde, DK-4000, Denmark	Schild S.L.A., Department of Animal Science, Aarhus University, Blichers Allé 20, Tjele, DK-8830, Denmark; Brandt P., Danish Meat Research Institute, Maglegaardsvej 2, Roskilde, DK-4000, Denmark; Rousing T., Department of Animal Science, Aarhus University, Blichers Allé 20, Tjele, DK-8830, Denmark; Herskin M.S., Department of Animal Science, Aarhus University, Blichers Allé 20, Tjele, DK-8830, De…	The aim of the present study was to examine behavioural and clinical consequences of the presence of umbilical outpouchings (UOs) in pigs during the day of slaughter, in order to establish new knowledge of relevance for the assessment of fitness for transport of these animals. Based on the Danish national guidelines involving the diameter of the UOs, considerable attention was paid to this measur…	Animal welfare; Behaviour; Pig; Slaughter; Umbilical hernia; Umbilical outpouching	English	Article	Final		Scopus	2-s2.0-84928927000
	Carroll A.D.; Cisneros A.; Porter H.; Moody C.; Stellato A.C.	57730453800; 57730430400; 57730462900; 57203313031; 57192980370	Dog Owner Perceptions of Veterinary Handling Techniques	no slaughter context	2022	Animals	12	11	1387				10.3390/ani12111387	0	https://www.scopus.com/inward/record.uri?eid=2-s2.0-85131457404&doi=10.3390%2fani12111387&partnerID=40&md5=27ba97fff492db95d0f600eba773b152	Department of Animal and Food Sciences, Texas Tech University, 2500 Broadway, Lubbock, 79409, TX, United States; Department of Animal Science, University of California Davis, One Shields Ave, Davis, 95616, CA, United States	Carroll A.D., Department of Animal and Food Sciences, Texas Tech University, 2500 Broadway, Lubbock, 79409, TX, United States; Cisneros A., Department of Animal and Food Sciences, Texas Tech University, 2500 Broadway, Lubbock, 79409, TX, United States; Porter H., Department of Animal and Food Sciences, Texas Tech University, 2500 Broadway, Lubbock, 79409, TX, United States; Moody C., Department o…	Veterinary care can be a source of stress for domestic dogs and their owners. If a dog owner is not satisfied with the veterinary experience, this may reduce the frequency of veterinary visits and negatively impact a dog’s health and welfare. Allowing dog owners to offer their perspectives on aspects of the veterinary appointment may help improve owner satisfaction. We assessed owner agreement to…	dog 1; handling 2; owner perspectives 4; veterinary clinic 3	English	Article	Final	All Open Access; Gold Open Access	Scopus	2-s2.0-85131457404
	Shih H.-Y.; Phillips C.J.C.; Mills D.S.; Yang Y.; Georgiou F.; Paterson M.B.A.	57209712559; 57216214020; 55963188300; 57226507771; 57211136984; 55574798000	Dog Pulling on the Leash: Effects of Restraint by a Neck Collar vs. a Chest Harness	no slaughter context	2021	Frontiers in Veterinary Science	8		735680				10.3389/fvets.2021.735680	2	https://www.scopus.com/inward/record.uri?eid=2-s2.0-85115267257&doi=10.3389%2ffvets.2021.735680&partnerID=40&md5=52136725c184e9140c3986575e8e1b5f	School of Veterinary Science, University of Queensland, Gatton, QLD, Australia; Curtin University Sustainability Policy Institute, Bentley, WA, Australia; School of Life Sciences, University of Lincoln, Lincoln, United Kingdom; School of Mathematical and Physical Sciences, University of Newcastle, Callaghan, NSW, Australia; Royal Society for the Prevention of Cruelty to Animals Queensland, Brisba…	Shih H.-Y., School of Veterinary Science, University of Queensland, Gatton, QLD, Australia; Phillips C.J.C., Curtin University Sustainability Policy Institute, Bentley, WA, Australia; Mills D.S., School of Life Sciences, University of Lincoln, Lincoln, United Kingdom; Yang Y., School of Veterinary Science, University of Queensland, Gatton, QLD, Australia; Georgiou F., School of Mathematical and P…	Leash pulling is a concern for dog owners and can be detrimental to the health and welfare of dogs. Neck-collars and back-connection harnesses are popular restraint types. Harnesses have been proposed as a better and more considerate option for canine health and welfare. Anecdotally, dogs pull more when wearing a back-connection harness; however, there is no scientific evidence for this perceptio…	collar; dog; food; harness; leash; pull; tension; toy	English	Article	Final	All Open Access; Gold Open Access; Green Open Access	Scopus	2-s2.0-85115267257
	Baldinger L.; Bussemas R.	36738774700; 35267891700	Dual-purpose production of eggs and meat — Part 1: cockerels of crosses between layer and meat breeds achieve moderate growth rates while showing unimpaired animal welfare	no slaughter context	2021	Organic Agriculture	11	3		489	498	9	10.1007/s13165-021-00357-z	4	https://www.scopus.com/inward/record.uri?eid=2-s2.0-85107029362&doi=10.1007%2fs13165-021-00357-z&partnerID=40&md5=69f0f8079d09bd7126474597d0dc96fc	Thünen Institute of Organic Farming, Trenthorst 32, Westerau, 23847, Germany	Baldinger L., Thünen Institute of Organic Farming, Trenthorst 32, Westerau, 23847, Germany; Bussemas R., Thünen Institute of Organic Farming, Trenthorst 32, Westerau, 23847, Germany	The use of modern chicken genotypes with high egg or meat performance results in the ethically unacceptable practice of culling day-old male layer chicks because of their inefficient fattening performance. Dual-purpose genotypes with a balanced performance profile for both eggs and meat are one option to avoid this practice. In this study, four chicken crosses of a layer breed (White Rock or New …	Broiler; Brother rooster; Dual-purpose chicken	English	Article	Final	All Open Access; Hybrid Gold Open Access	Scopus	2-s2.0-85107029362
	Mulder M.; Zomer S.	55609230700; 57191343574	Dutch Consumers’ Willingness to Pay for Broiler Welfare	no slaughter context	2017	Journal of Applied Animal Welfare Science	20	2		137	154	17	10.1080/10888705.2017.1281134	42	https://www.scopus.com/inward/record.uri?eid=2-s2.0-85011649863&doi=10.1080%2f10888705.2017.1281134&partnerID=40&md5=ccbc21de7dda5fc022ee043bb94323c1	Department of Economics and Business, University of Groningen, Groningen, Netherlands; Department of Economics and Business, Vrije Universiteit, Amsterdam, Netherlands	Mulder M., Department of Economics and Business, University of Groningen, Groningen, Netherlands; Zomer S., Department of Economics and Business, Vrije Universiteit, Amsterdam, Netherlands	This article analyzes Dutch consumers’ willingness to pay (WTP) for the welfare of broiler chickens and the consequences for nonhuman animal welfare policies. Using data from a discrete-choice experiment and a random parameter logit model, this study showed that consumers particularly value opportunities for outdoor access and the method used for anesthesia before slaughter. The WTP was also posi…	Broiler welfare; choice experiment; The Netherlands; willingness to pay	English	Article	Final	All Open Access; Green Open Access; Hybrid Gold Open Access	Scopus	2-s2.0-85011649863
	Werner D.; Baldinger L.; Bussemas R.; Büttner S.; Weißmann F.; Ciulu M.; Mörlein J.; Mörlein D.	57197480348; 36738774700; 35267891700; 57221731986; 16317715200; 23099323600; 57195408229; 22951040500	Early immunocastration of pigs: From farming to meat quality	no slaughter context	2021	Animals	11	2	298	1	15	14	10.3390/ani11020298	3	https://www.scopus.com/inward/record.uri?eid=2-s2.0-85099926794&doi=10.3390%2fani11020298&partnerID=40&md5=4bca0d42dc845a187a50ef579bfbc090	Institute of Organic Farming, Johann Heinrich von Thuenen Institute, Trenthorst 32, Westerau, 23847, Germany; Department of Animal Sciences, University of Goettingen, Kellnerweg 6, Göttingen, 37077, Germany	Werner D., Institute of Organic Farming, Johann Heinrich von Thuenen Institute, Trenthorst 32, Westerau, 23847, Germany; Baldinger L., Institute of Organic Farming, Johann Heinrich von Thuenen Institute, Trenthorst 32, Westerau, 23847, Germany; Bussemas R., Institute of Organic Farming, Johann Heinrich von Thuenen Institute, Trenthorst 32, Westerau, 23847, Germany; Büttner S., Institute of Organi…	Immunocastration of boars to prevent boar taint in meat is usually performed during the fattening phase of pigs, which is sometimes impractical for pig fatteners. The aim of this study was to test the practicability of the immunization of suckling pigs against boar taint and to assess its influence on production performance and animal welfare in the fattening phase. The fattening and slaughtering…	Animal welfare; Boar taint; Fatty acid composition; Meat production; Performance	English	Article	Final	All Open Access; Gold Open Access	Scopus	2-s2.0-85099926794
	Calderón Díaz J.A.; Boyle L.A.; Diana A.; Leonard F.C.; Moriarty J.P.; McElroy M.C.; McGettrick S.; Kelliher D.; García Manzanilla E.	55830819900; 23491537100; 57195489083; 7005304157; 16031894900; 9250993700; 57195483559; 57195486067; 12792007200	Early life indicators predict mortality, illness, reduced welfare and carcass characteristics in finisher pigs	no slaughter context	2017	Preventive Veterinary Medicine	146			94	102	8	10.1016/j.prevetmed.2017.07.018	38	https://www.scopus.com/inward/record.uri?eid=2-s2.0-85028368098&doi=10.1016%2fj.prevetmed.2017.07.018&partnerID=40&md5=f3442c14190580eebaa08f3c37423889	Pig Development Department, Teagasc Animal and Grassland Research and Innovation Centre, Moorepark, Fermoy, Co. Cork, Ireland; Department of Animal Behaviour and Welfare, Institute of Genetics and Animal Breeding, Polish Academy of Sciences, Jastrzębiec, Magdalenka, Poland; School of Veterinary Medicine, University College Dublin, Dublin, Ireland; Central Veterinary Research Laboratory, Departmen…	Calderón Díaz J.A., Pig Development Department, Teagasc Animal and Grassland Research and Innovation Centre, Moorepark, Fermoy, Co. Cork, Ireland, Department of Animal Behaviour and Welfare, Institute of Genetics and Animal Breeding, Polish Academy of Sciences, Jastrzębiec, Magdalenka, Poland; Boyle L.A., Pig Development Department, Teagasc Animal and Grassland Research and Innovation Centre, Moo…	The objective of this study was to investigate associations between early life indicators, lactation management factors and subsequent mortality, health, welfare and carcass traits of offspring. A total of 1016 pigs from a batch born during one week were used. During lactation, number of liveborn piglets, stillborn and mummies, sow parity, number of times cross-fostered, weaning age, birth and we…	Lactation period; Mortality; Organ condemnations; Performance; Pigs; Respiratory diseases	English	Article	Final	All Open Access; Bronze Open Access; Green Open Access	Scopus	2-s2.0-85028368098
	Andersson K.; Brunius C.; Zamaratskaia G.; Lundström K.	7402135765; 43961010700; 8153227900; 7005204209	Early vaccination with Improvac®: Effects on performance and behaviour of male pigs	no slaughter context	2012	Animal	6	1		87	95	8	10.1017/S1751731111001200	41	https://www.scopus.com/inward/record.uri?eid=2-s2.0-82955239808&doi=10.1017%2fS1751731111001200&partnerID=40&md5=859709e4bbce554816dcdf5f167c6966	Department of Animal Nutrition and Management, Swedish University of Agricultural Sciences, Box 7024, SE-750 07 Uppsala, Sweden; Department of Food Science, Swedish University of Agricultural Sciences, Box 7051, SE-750 07 Uppsala, Sweden	Andersson K., Department of Animal Nutrition and Management, Swedish University of Agricultural Sciences, Box 7024, SE-750 07 Uppsala, Sweden; Brunius C., Department of Food Science, Swedish University of Agricultural Sciences, Box 7051, SE-750 07 Uppsala, Sweden; Zamaratskaia G., Department of Food Science, Swedish University of Agricultural Sciences, Box 7051, SE-750 07 Uppsala, Sweden; Lundstr…	The aim of this study was to investigate the effect of giving a two-dose regimen of gonadotropin-releasing hormone vaccine, Improvac® (Pfizer Ltd), earlier than currently recommended, on performance and behaviour of growing/finishing pigs. Cross-bred male pigs (n = 192) were randomly allocated, within a litter, into four groups at birth: one group of pigs surgically castrated without anaesthesia …	behaviour; early vaccination against GnRH; male pigs; performance	English	Article	Final	All Open Access; Green Open Access	Scopus	2-s2.0-82955239808
	Dawkins M.S.; Roberts S.J.; Cain R.J.; Nickson T.; Donnelly C.A.	7006098988; 57203276441; 55235639900; 57190116882; 35468127900	Early warning of footpad dermatitis and hockburn in broiler chicken flocks using optical flow, bodyweight and water consumption	no slaughter context	2017	Veterinary Record	180	20		499			10.1136/vr.104066	32	https://www.scopus.com/inward/record.uri?eid=2-s2.0-85017566085&doi=10.1136%2fvr.104066&partnerID=40&md5=5d32d1dc96aebf776729fb5dec07e7d3	Department of Zoology, University of Oxford, Oxford, United Kingdom; Department of Engineering Science, University of Oxford, Oxford, United Kingdom; Department of Infectious Disease Epidemiology, MRC Centre for Outbreak Analysis and Modelling, School of Public Health, Imperial College, London, United Kingdom	Dawkins M.S., Department of Zoology, University of Oxford, Oxford, United Kingdom; Roberts S.J., Department of Engineering Science, University of Oxford, Oxford, United Kingdom; Cain R.J., Department of Zoology, University of Oxford, Oxford, United Kingdom; Nickson T., Department of Engineering Science, University of Oxford, Oxford, United Kingdom; Donnelly C.A., Department of Infectious Disease …	Footpad dermatitis and hockburn are serious welfare and economic issues for the production of broiler (meat) chickens. The authors here describe the use of an inexpensive camera system that monitors the movements of broiler flocks throughout their lives and suggest that it is possible to predict, even in young birds, the cross-sectional prevalence at slaughter of footpad dermatitis and hockburn b…	automated assessment; Chicken welfare; flock behaviour; foot pd dermatitis; hock burn	English	Article	Final	All Open Access; Green Open Access	Scopus	2-s2.0-85017566085
[truncated: 969 more rows]
